# Supplementary material
Source: PubMed Central journal article supplement (PMC2872544)
Supplement: NIHMS187230-supplement-1.pdf [file NIHMS187230-supplement-1.pdf]

## Supplementary Information

for

### Genome Remodeling in a Basal-like Breast Cancer Metastasis and Xenograft

Li Ding<sup>\*1,2</sup>, Matthew J. Ellis<sup>\*3,4</sup>, Shunqiang Li<sup>3</sup>, David E. Larson<sup>1</sup>, Ken Chen<sup>1</sup>, John W. Wallis<sup>1,2</sup>, Christopher C. Harris<sup>1</sup>, Michael D. McLellan<sup>1</sup>, Robert S. Fulton<sup>1,2</sup>, Lucinda L. Fulton<sup>1,2</sup>, Rachel M. Abbott<sup>1</sup>, Jeremy Hoog<sup>3</sup>, David J. Dooling<sup>1,2</sup>, Daniel C. Koboldt<sup>1</sup>, Heather Schmidt<sup>1</sup>, Joelle Kalicki<sup>1</sup>, Qunyuan Zhang<sup>2,5</sup>, Lei Chen<sup>1</sup>, Ling Lin<sup>1</sup>, Michael C. Wendl<sup>1,2</sup>, Joshua F. McMichael<sup>1</sup>, Vincent J. Magrini<sup>1,2</sup>, Lisa Cook<sup>1</sup>, Sean D. McGrath<sup>1</sup>, Tammi L. Vickery<sup>1</sup>, Elizabeth Appelbaum<sup>1</sup>, Katherine DeSchryver<sup>3</sup>, Sherri Davies<sup>3</sup>, Therese Guintoli<sup>3</sup>, Li Lin<sup>3</sup>, Robert Crowder<sup>3</sup>, Yu Tao<sup>6</sup>, Jacqueline E. Snider<sup>3</sup>, Scott M. Smith<sup>1</sup>, Adam F. Dukes<sup>1</sup>, Gabriel E. Sanderson<sup>1</sup>, Craig S. Pohl<sup>1</sup>, Kim D. Delehaunty<sup>1</sup>, Catrina C. Fronick<sup>1</sup>, Kimberley A. Pape<sup>1</sup>, Jerry S. Reed<sup>1</sup>, Jody S. Robinson<sup>1</sup>, Jennifer S. Hodges<sup>1</sup>, William Schierding<sup>1</sup>, Nathan D. Dees<sup>1</sup>, Dong Shen<sup>1</sup>, Devin P. Locke<sup>1</sup>, Madeline E. Wiechert<sup>1</sup>, James M. Eldred<sup>1</sup>, Josh B. Peck<sup>1</sup>, Benjamin J. Oberkfell<sup>1</sup>, Justin T. Lolofie<sup>1</sup>, Feiyu Du<sup>1</sup>, Amy E. Hawkins<sup>1</sup>, Michelle D. O'Laughlin<sup>1</sup>, Kelly E. Bernard<sup>1</sup>, Mark Cunningham<sup>1</sup>, Glendoria Elliott<sup>1</sup>, Mark D. Mason<sup>1</sup>, Dominic M. Thompson, Jr.<sup>7</sup>, Jennifer L. Ivanovich<sup>7</sup>, Paul J. Goodfellow<sup>7</sup>, Charles M. Perou<sup>8</sup>, George M. Weinstock<sup>1,2</sup>, Rebecca Aft<sup>7</sup>, Mark Watson<sup>9</sup>, Timothy J. Ley<sup>1,2,3,4</sup>, Richard K. Wilson<sup>1,2,4\*\*</sup>, and Elaine R. Mardis<sup>1,2,4</sup>

\*These authors contributed equally to this work

\*\*Correspondence to Richard K. Wilson (Email: [rwilson@wustl.edu](mailto:rwilson@wustl.edu))

<sup>1</sup>The Genome Center at Washington University, <sup>2</sup>Department of Genetics, <sup>3</sup>Department of Medicine, <sup>4</sup>Siteman Cancer Center, <sup>5</sup>Division of Statistical Genomics, <sup>6</sup>Division of Biostatistics, <sup>7</sup>Department of Surgery and the Young Women's Breast Cancer Program, <sup>9</sup>Department of Pathology and Immunology, Washington University School of Medicine, St Louis, Missouri 63108, USA. <sup>8</sup>Department of Genetics, Lineberger Cancer Center, University of North Carolina, Chapel Hill, NC 27599, USA.

Excel spreadsheets can be downloaded from [http://genome.wustl.edu/supplemental/BCA\\_nature\\_2010](http://genome.wustl.edu/supplemental/BCA_nature_2010)

## Table of Content

A. Supplementary Materials and Methods (pg 3-23)

B. Supplementary Figures (pg 24-26)

C. Supplementary Figure Legends (pg 27)

D. Supplementary Tables (pg 28-71)

E. Supplementary References (pg 72)

## A. Supplementary Materials and Methods

### Illumina library construction

We followed the procedure described by Mardis *et al*(1), modified for low input DNA amounts. Briefly, we started with 100ng of DNA from primary tumor, metastasis, xenograft, and the matched normal, in duplicate. After the DNA was fragmented, end repaired, and ligated with adaptors, we amplified the products and ran them on a polyacrylamide gel. We then excised gel slices between 100 bp and 400 bp at 50 bp increments, and eluted the DNA from each gel slice for making independent libraries. We prepared 4, 7, 4, and 16 libraries for primary tumor, metastasis, xenograft, and the matched normal, respectively. All libraries except for one normal library were used for subsequent sequencing.

- Normal: We used 15 of the 16 libraries (Library 11 had a single failed flowcell). Of those 15 libraries, Libraries 9 and 10 were fragment reads of length 75 bp.
- Primary tumor: 4 libraries were used.
- Brain metastasis: 7 libraries were used. Of those 7, Library 7 consisted of fragment reads of length 75 bp.
- Xenograft: 4 libraries were used.

We also made one library using normal male mouse spleen DNAs of NOD/SCID strain from the Jackson Laboratory. We combined 1ug genomic DNA from 4 samples to a final concentration of 100ng/ul. Then we prepared a single 1ug Illumina PE library from the pooled DNA (shearing the DNA with the wide range Covaris program). The final library DNA was size-fractionated to obtain a 200-500 bp library size range.

NOD/SCID has a spontaneous mutation congenic on a NOD/ShiLtJ background. Mice are homozygous for the *scid* mutation (*Prkdc*<sup>*scid*</sup>, commonly referred to as *scid*). The mutation occurs in the gene that encodes the catalytic sub-unit of the DNA-activated protein kinase (*Prkdc*).

### **Illumina sequencing**

After diluting the libraries to a 10nM concentration, we utilized the paired-end flow cell and cluster generation kits to produce flow cells with an average cluster density ranging between 170,000 to 220,000 clusters per tile. We employed the standard sequencing kits (Illumina Sequencing Kit v3) and performed 36-100 cycles of nucleotide incorporation. Following this first round of end sequencing, the flow cell was treated to remove the synthesized fragments, clusters were re-amplified, and the resulting fragments were linearized. We then annealed the read 2 sequencing primer, and initiated another round of sequencing by synthesis to complete the read pairs. The read length for the second sequencing round matched that of the first. Following each instrument run, we utilized the Illumina sequencing pipeline, version 1.3, to analyze the data and produced files containing high quality (“passed filter”) reads with associated quality values.

### **Alignment, coverage analysis, and SNV/Indel calling**

Illumina reads from metastasis, primary tumor, xenograft, and matched normal blood sample were aligned separately to the human NCBI Build 36 reference sequence using Maq(2). Genome-wide coverages were assessed by comparing SNVs detected by Maq with SNPs genotyped using Illumina 1M duo arrays for the primary tumor, the brain metastasis, and the matched normal. SNP array hybridization was not performed with xenograft DNA. Instead, we used the SNP array for the brain metastasis as a surrogate for monitoring the genome coverage of the xenograft. SNV positions detected by Maq were further filtered using Maq SNPfilter. Tumor indels detected by SAMtools(3) and supported by reads from at least two libraries were used for downstream somatic validation.

### **Comparison to dbSNP and other personal SNPs**

We again followed the same procedure as described in Mardis *et al*(1). Predicted SNVs and Indels were compared to dbSNP 129. For SNVs, we require a position match for determining concordance between the variant and dbSNP 129. In addition, we compared (by position) predicted SNVs with SNPs found in the CEU and YRI trios as determined from the 1,000 Genomes project. CEU SNPs were predicted by Maq using alignment files downloaded from the

1,000 Genomes web portal. Maq was used to align the YRI trio reads generated by our center to human NCBI Build 36 and to predict SNPs.

### **Identification of Somatic SNVs and small Indels**

**SNVs:** The Maq variant calling model, which takes into account basecall and mapping errors, was used to generate genotype likelihood files (GLF, exported with Maq glfgen) for primary tumor, metastasis, xenograft, and the matched normal. Using these files as inputs, we used a Bayesian calculation to determine a “Somatic” score. This score is a Phred-scaled probability that the tumor and normal genotypes were different at a position by error (e.g. when comparing primary tumor to the matched normal, metastasis to the matched normal, or xenograft to the matched normal). We simplified this calculation by assuming that the tumor and normal genotypes and data were independent. The prior probability is estimated based upon a population frequency of heterozygous variants of 0.001. We also computed the probability of different genotypes in metastasis and primary tumor to identify metastasis-specific SNVs. Variants where the Somatic score is greater than 40 and the average mapping qualities of reads supporting the variant in the tumor are greater than or equal to 70 are considered to be high-quality somatic variants, while the rest are designated as low-quality somatic variants. The high-quality cutoffs were determined by analysis of validation data from other in-house genomes. Manual review using IGV (<http://www.broadinstitute.org/igv/>) was performed on low-quality variants found in primary tumor, brain metastasis, and xenograft to eliminate false positives.

**Indels:** Indels were detected using a modified SAMtools indel-calling algorithm, tuned to detect differences between tumor and normal samples. Three filters were applied to this list: 1. remove any indel calls without multiple libraries supporting the call; 2. remove any indel calls with any normal support; and 3. remove all 1-bp indels without at least 10% of their total read coverage supporting the variant call. All remaining sites were annotated to identify coding and splice site indels. Reviewers examined each of these sites manually in whole genome data to select sites for experimental validation. Using available paired-end data, we can detect insertions up to 13 bp and deletions up to 30 bp .

*Summary of mutation detection in the primary tumor, metastasis, and xenograft*

We identified 4,121,595; 3,860,638; and 3,618,536 high quality SNVs in the primary tumor, metastasis, and xenograft, respectively. The process for selecting candidate somatic SNVs is shown in Supplementary Table 2. Briefly, we predicted 23,772 (3,372 high confidence (HC)), 28,308 (5,799 HC), and 23,558 (7,559 HC) putative somatic SNVs in the respective genomes. We further classified variants into four tiers according to genome annotations. Putative somatic SNVs that overlap with coding sequence, splice sites, and RNA genes were included as “tier 1”. Based on confidence assignment and manual review, 67, 65, and 54 tier 1 SNV sites detected in the primary tumor, metastasis, and xenograft were selected for experimental validation (Supplementary Table 2a). In parallel, we predicted 45,946; 61,857; and 19,844 small indels in the respective samples as novel potential somatic mutations and successfully assembled 1,683; 2,026; and 827 putative somatic multi-base indels in their respective genomes. There were 48, 59, and 91 tier 1 indels that passed manual review in each respective sample, and these were selected for experimental validation (Supplementary Table 2b). Among the 28 predicted tier 1 HC SNVs and 48 indels in the primary tumor, 16 SNVs and 4 indels were validated as somatic sites (Supplementary Table 2a and 2b). In the metastasis, 46 HC SNVs and 59 indels were predicted, of which 33 and 7, respectively, were validated as somatic sites (Supplementary Table 2a and 2b). In the xenograft, 37 HC SNVs were validated and are present in primary tumor and/or the metastasis (Supplementary Table 2a and 2b).

#### *Identification of point mutations and small indels in primary tumor genome*

We identified 4,967,429 SNVs in the primary tumor genome, of which 4,121,595 passed Maq SNPfilter. Of these, 3,540,263 were previously described in dbSNP 129 or found in CEU and YRI trios as determined from the 1,000 Genomes project (Supplementary Table 2a), indicating that they were inherited variants. Of the 581,332 potentially novel SNVs, 554,159 were also detected in the genome of normal cells from the same patient, suggesting that they are the patient’s private inherited SNPs. After eliminating 2,007 LOH sites and 1,394 SNVs from Mitochondria and NT random contigs without annotation in the UCSC genome database (September 2008 download), we classified the remaining 25,166 potential novel somatic SNVs into four tiers, which are detailed in the “Tier annotation and SIFT annotation” section below. We identified 200 (28 high confidence (HC)) potential tier 1 mutations, 911 (185 HC) potential tier 2 mutations, 4,503 (920 HC) potential tier 3 mutations, and 18,158 (2,239 HC) potential tier 4

mutations. Of the 172 tier 1 variants that were called with low confidence, manual review was performed and 39 were selected for experimental validation (Supplementary Table 2a).

Indels were detected using a modified SAMtools indel-calling algorithm tuned to discover differences between tumor and normal samples. Of the 4,396,160 primary tumor indels detected by SAMtools, 631,536 are supported by reads from multiple primary tumor libraries. Among them, 60,399 are supported by reads from the normal, suggesting that they are germline indels. Since a 1-bp indel is often simply just a sequencing artifact, we required these cases to be additionally supported by greater than or equal to 10% of their total tumor coverage to reduce systematic noise. We identified 45,946 indels as novel potential somatic indels and further selected 116 that could potentially affect the coding or splice sites. Of the 116 putative somatic indels, 48 passed manual review and were subjected to experimental validation (Supplementary Table 2b).

#### *Identification of point mutations and small indels in metastasis genome*

In parallel, we identified 4,647,103 SNVs in the metastasis genome. Of the 3,860,638 that passed Maq SNPfilter, 3,321,746 were previously described, indicating that they were inherited variants. Of the 538,892 potentially novel SNVs, 487,182 were also detected in the normal genome. This leaves 51,710 as potentially novel somatic SNVs including 21,690 LOH sites, 28,308 sites that were further grouped into four tiers, and 1,712 MT and NT sites without tier assignment. Tier 1 includes 46 high confidence and 179 low confidence sites. Of the 179 variants that were called as low confidence, manual review (Supplementary Table 2a) was performed and 19 were selected for experimental validation.

Of the 4,684,771 metastasis indels detected by SAMtools, 713,933 are supported by reads from multiple libraries. Among them, 628,891 are supported by reads from the normal, suggesting that they are germline indels. After further filtering 1-bp indels with the same strategy used for primary tumor indel analysis, we identified 61,857 as novel potential somatic indels and further selected 125 that could potentially affect the coding or splice sites/regions for manual review. The 59 that passed manual review were subjected to experimental validation (Supplementary Table 2b).

### *Identification of point mutations and small indels in xenograft genome*

We identified 4,489,151 SNVs in the xenograft genome, of which 3,618,536 passed Maq SNPfilter. Of these SNVs, 3,144,926 were previously described in dbSNP 129 or found in CEU and YRI trios as determined from the 1,000 Genomes project (Supplementary Table 2a), indicating that they were inherited variants. Of the 473,610 potentially novel SNVs, 3,171 were detected in NOD/SCID and 361,361 were also detected in the genome of normal cells from the same patient, suggesting that they are the patient's private inherited SNPs. After eliminating 83,763 LOH sites and another 1,757 SNVs from Mitochondria and NT random contigs which were without annotation in the UCSC genome database, we classified the remaining potential novel somatic SNVs into four tiers, which are detailed in the "Tier annotation and SIFT annotation" section below. We identified 328 (100 high confidence (HC)) potential tier 1 mutations, 1,475 (675 HC) potential tier 2 mutations, 4,832 (2,287 HC) potential tier 3 mutations, and 16,923 (4,497 HC) potential tier 4 mutations. Of the 100 HC tier 1 variants, manual review was performed and 54 were selected for experimental validation (Supplementary Table 2a).

Of the 3,604,771 xenograft indels detected by SAMtools, 438,603 are supported by reads from multiple primary tumor libraries. Among them, 418,678 are supported by reads from the normal, suggesting that they are germline indels. After removing those 1-bp indels supported by less than 10% of their total tumor read coverage, we identified 19,844 indels as novel potential somatic and further selected 128 that could affect coding or splice sites. Of the 128 putative somatic indels, 91 passed manual review and we successfully designed primers for 90 sites that were then subjected to experimental validation (Supplementary Table 2b).

### *Comparison of brain metastasis and primary tumor genomes*

In order to identify mutations that are unique to or enriched in metastasis, we compared the metastasis genome with the primary tumor genome. We predicted 18 high confidence tier 1 SNV sites and 203 low confidence tier 1 SNV sites, of which 48 passed manual review (Supplementary Table 2c). In addition, we predicted 70 tier 1 indels, of which 56 passed manual review (Supplementary Table 2d).



## **Manual review guidelines for candidate selection and validation review:**

### *Illumina data*

Manual review and validation selection of low quality putative somatic SNVs and all putative somatic Insertions and Deletions.

1. The variant should be supported by at least 10% of high quality, unique reads in the tumor sample, with a minimum of two reads supporting a variant in the tumor sample and no high quality reads supporting the variant in the normal sample.
2. Variant supporting, high quality reads should not contain more than two high quality basepair mismatches.
3. Variant supporting reads or read pairs should map uniquely in the human genome.
4. Unique reads are identified and duplicate reads removed based on identical start positions of both reads if mapped.
5. Variants supported by extremely high levels of localized coverage are discarded.
6. Variants occurring only in reads containing simple repeat sequences are discarded as amplification artifacts.
7. Variants with excessive levels of support on only the positive or negative strand are discarded.
8. Indels occurring in homopolymers larger than 6 bp are reported as PCR amplification artifacts.

### *3730/Sanger sequencing validation with genomic PCR products*

1. 3730 scf formatted trace files are basecalled by Phred and aligned to a sequence representative of the PCR product derived from NCBI Build 36.
2. Variants are considered validated when supported by high quality sequence from at least one PCR product with little to no background at base positions surrounding the variant site for SNVs, and little or no background preceding the breakpoint for heterozygous indels.
3. If coverage is available for both strands and the variant is only supported by a single strand the variant is discarded as a sequencing or capillary migration artifact

4. If high background signals occur in the reads supporting the variant, the variant is considered ambiguous and the validation experiment is repeated.
5. If more than two novel variants occur within a single read the sequence is realigned to the genome to exclude the possibility of paralog amplification.
6. If reads from multiple samples derived from different individuals support an identical somatic mutation, the validation is repeated to exclude the possibility of contamination.

### **Tier annotation and SIFT annotation**

Transcripts from Ensembl build (46) and GenBank download (August 27th, 2007) were used for SNV and indel annotation in primary tumor and brain metastasis during the discovery phase. Transcripts from Ensembl build (54) and GenBank download (May 21<sup>st</sup>, 2009) were used for SNV and indel annotation in xenograft and also the final annotation for Table 1. Variants were classified into the following four tiers as described in Mardis *et al*(1).

**Tier 1:** Coding synonymous, nonsynonymous, splice site, and RNA variants

**Tier 2:** Conserved variants (cutoff: conservation score greater than or equal to 500 based on either the phastConsElements28way table or the phastConsElements17way table from the UCSC genome browser, and variants in regulatory regions annotated by UCSC annotation (Regulatory annotations included are targetScanS, ORegAnno, tfbsConsSites, vistaEnhancers, eponine, firstEF, L1 TAF1 Valid, Poly(A), switchDbTss, encodeUViennaRnaz, laminB1, cpgIslandExt)

**Tier 3:** Variants in non-repeat masked regions

**Tier 4:** The remaining SNVs

SIFT(3), which searches against the human SWALL database, was used to evaluate the potential impact on protein function for the eight validated missense mutations.

### **Validation of putative somatic SNVs and Indels by ABI 3730 and deep Illumina and/or 454 read counts**

We combined tier 1 sites identified in primary tumor and brain metastasis and obtained deep read count data for the unique set including 156 substitutions (64 HC and 92 LC) and 140 indels. We attempted to design three independent primer pairs per site whenever possible and ensured all primers did not include SNP sites detected in this patient's genome. All primer pairs were used

for PCR amplification of DNA samples from peripheral blood, primary tumor, brain metastasis, and xenograft. PCR products from each sample were pooled and then prepared for Illumina sequencing. We also PCR amplified and sequenced 140 indels using the ABI 3730 platform. The combined analysis of Illumina and 3730 data initially yielded 46 somatic sites including 39 SNVs and 7 indels.

We then combined these 46 sites with the 251 putative tier 1 somatic sites (160 SNVs and 91 indels) detected in the xenograft to generate a unique set of 168 SNVs and 92 indels for ABI 3730 validation and Roche/454 deep read count analysis using all 4 samples. We were unable to design primers for one indel from a highly repetitive region. Four germline sites were included as controls. All validation reads were mapped to the NCBI build36 reference sequence, and to a modified reference where the putative variants were present, to obtain the number of reads supporting the variant and reference alleles in each sample.

#### *3730 validation*

We designed PCR primers that were tailed with universal forward and reverse primers, to produce optimal size amplicons ranging from 200 to 300 bp. Larger or smaller amplicons were picked if optimal size amplicons were otherwise not feasible. DNA samples from primary tumor, metastasis, xenograft, and the matched normal were used for PCR amplification and then the individual PCR product was sequenced on ABI 3730 using universal primers. Manual review was performed using amplicon-based assembly in Consed to determine the somatic status for each site.

#### *Illumina and 454 deep read count*

We prepared the pooled PCR products from validation reactions for Illumina and/or 454 sequencing in order to generate deep sampling of read counts for tier 1 SNV and indel sites. We ensured all primers did not span any SNP sites detected in this patient's genome.

**Illumina:** PCR products were concatenated and fragmented using the Covaris sonicator. Illumina adaptors were ligated to the resulting fragments, and we subsequently size-selected a 250-300 bp insert size for sequencing. We obtained 75 bp Illumina fragment reads, which were

then analyzed through the manufacturer's primary pipeline. For SNVs, these reads were aligned to the NCBI Build 36 reference sequence using Maq. Read counts of the reference and variant bases piling up at putative somatic positions were then tallied to validate these sites using a mapping quality threshold ( $\geq q30$ ) to remove noise resulting from poor alignments. For indels, a set of 100 bp contigs was created, one contig containing the mutated putative sequence, the other the reference sequence. The contig length forces all reads aligning to the contig to cross the putative indel site. Maq was again used to perform this alignment. Average coverage of these contigs was used as an approximation for site counts, with a high quality mapping cutoff used as in the SNV analysis.

The detailed procedure for pooling and concatenation and amplicon size are listed as the following:

The 3 designed amplicons (primer pairs) for each site as described in the text were split into 3 different groups: Set1, Set2, and Set3. This resulted in 12 different pools:

#### Primary Tumor

primer set1 -> pool #1

primer set2 -> pool #2

primer set3 -> pool #3

#### Normal

primer set1 -> pool #4

primer set2 -> pool #5

primer set3 -> pool #6

#### Metastasis

primer set1 -> pool #7

primer set2 -> pool #8

primer set3 -> pool #9

#### Xenograft

primer set1 -> pool #10  
primer set2 -> pool #11  
primer set3 -> pool #12

All 12 pools were concatenated and run on 1 lane Illumina for a total of 12 lanes (75 bp fragments).

#### AMPLICON SIZES:

all "set1" pools -> 79 - 1115 bp  
all "set2" pools -> 62 - 1175 bp  
all "set3" pools -> 63 - 1233 bp

Each pool was concatenated with the following methods:

1) End repair the amplicon pools using the Lucigen DNA Terminator End Repair Kit:

y ul purified, amplicon DNA (1-5ug)  
x ul H<sub>2</sub>O  
10 ul 5X DNA Terminator End Repair Buffer  
2 ul DNA Terminator End Repair Enzymes  
50 ul final volume

Incubate at room temperature for 30 minutes.

2) Perform a QIAGEN minelute column clean-up, according to the manufacturer's instructions, with the following exception - elute 2X with 15uL of EB buffer (30uL total recovery).

3) Run a 1.2% Lonza Flashgel to verify DNA recovery (1uL of each sample).

4) Set up ligation reactions with a control using the New England BioLabs Quick Ligase Kit.

Sample cocktail:

50 ul 2X Quick Ligase Buffer

18 ul 40% PEG-8000

25 ul DNA

5 ul H<sub>2</sub>O

2 ul T4 DNA Quick Ligase \_

100 ul final volume

no ligase control cocktail:

50 ul 2X Quick Ligase Buffer

18 ul 40% PEG-8000

3 ul DNA

29 ul H<sub>2</sub>O

0 ul T4 DNA Quick Ligase

100 ul final volume

Incubate at room temperature for 30 minutes.

5) Run a 2.2% Lonza FlashGel to confirm concatenation (5uL of each ligation).

6) Precipitate concatenated products prior to fragmentation on the Covaris. The excess glycerol in the amplification reaction will inhibit fragmentation.

Add 2.5x ice cold EtOH to volume of sample.

Add 0.1x 3M NaOAc to volume of sample.

Spin 15 minutes at 15,000 rpm.

Dump supernatant.

Wash with 500ul of ice cold 70% EtOH.

Spin 10 minutes at 15,000 rpm.

Air dry.

Another round of Illumina pooling experiment was conducted for 9 sites without sufficient read counts. Only primer pair 1 was used the second pooling experiment.

**454:** PCR products from the first primer pair for each site were pooled and then were subjected to 454 library construction followed by Titanium sequencing. Read sequences and quality scores were extracted with sffinfo (454 proprietary software), and then aligned to NCBI Build 36 using SSAHA2 with the SAM output option(4). Alignments were imported to BAM format using SAMtools. A SAMtools pileup file was generated, and read counts were determined by VarScan(5). We required a minimum base quality of 15, with at least 20 reads aligned, to report the allele frequencies. Variant frequencies were corrected based on tumor pathology as described above for Illumina reads.

#### **Significance testing of allele frequency enrichment across tissue types.**

To minimize the potential bias introduced by an individual sequencing platform, we generated read count data for 50 point mutations and indels using both Illumina and 454 technologies. We produced Illumina read counts using three independent primer pairs (designated as primer pairs 1, 2, and 3) for 41 out of 50 somatic sites, finding high concordance (correlation coefficients of 0.82775, 0.87437 and 0.94234 for primary tumor, metastasis, and xenograft, respectively) of mutant allele frequencies derived from the read counts of the three primer pairs. Furthermore, we generated read count data from primer pair 1 in duplicate (two Illumina lanes: 1A and 1B) for all four samples (normal, primary tumor, metastasis, and xenograft) and found strong cross-lane consistency (Normal 1A vs 1B, Tumor 1A vs 1B, Met 1A vs 1B, Xeno 1A vs 1B) as demonstrated by the high correlation (coefficients range from 0.997 to 0.999) of coverage depth per site across lanes of the same sample. Finally, we used primer pair 1 to generate Illumina read counts for the 9 sites without sufficient counts from the first round of validation.

In order to determine enrichment in a tissue, we developed a significance test that takes into account the different platforms, experiments and primer pairs that we generated. In this test, a t-value for each variant was calculated as  $t=D/SD$  (where D is the mean difference of variant

frequency between two tested tissue groups, and SD is the standard deviation of variant frequency within tissue groups), and then p-values were calculated based on the t-distribution. Prior to the test, tumor read counts were adjusted based on the observed read counts of the normal tissue at that site and the pathology estimate of tumor cellularity of the tumor in question. Briefly, we assumed that, for an amplicon, the pathology estimate is accurate and the distribution of alleles contributed by the normal is identical to what was observed from the direct sequencing of the normal tissue. Therefore, if pathology predicted that 30% of cells in the tumor are normal, we calculate the contribution of the normal tissue to the tumor reference allele count as:

$(T_V + T_R) \cdot 0.3 \cdot \left( \frac{N_V}{N_V + N_R} \right)$ , where  $T_V$  and  $T_R$  are the tumor variant and reference allele counts, respectively, and  $N_V$  and  $N_R$  are the respective normal variant and reference allele counts.

### **Measurement of expression levels and potential splicing effects of a subset of identified somatic mutations using RT-PCR followed by 3730 sequencing and 454 read counts**

Based on transcript sequences surrounding the validated mutations with 200 base pairs of repeat-masked flanking sequence, we designed primers using Primer3 v0.4.0 (see below for citation) and successfully performed RT-PCR for 24 mutations using metastasis and xenograft RNAs. Due to the lack of RNA, RT-PCR was not performed for the primary tumor. For some of the mutations, we expanded the repeat-masked sequence to find suitable primers. Primer pairs were subsequently checked for uniqueness by BLAST to the entire CCDS transcriptome. The detailed RT-PCR experimental procedure is described in Mardis *et al*(1).

We were able to successfully amplify the mutant allele in the following genes and sequence using the ABI 3730: *GUK1*, *IGFBP3*, *SLC44A1*, *SHE*, *DYNC2H1*, *CHST7*, *FAM107B*, *NALCN*, *PPPDE1*, *PTPRJ*, *ZRSR2*, *MAP3K8*, *DDX11*, *TADA2L*, *TP53*, *RBM47*, *GTF3C3*, *IRAK2*, *JAK2*, *CHRNA9*, *KIAA0467*, and *WWTR1*.

We obtained sufficient 454 read counts for 11 mutations in both metastasis and xenograft. They are *GUK1*, *SLC44A1*, *PPDE1*, *DEPE3*, *MAP3K8*, *TADA2L*, *TP53*, *GTF3C3*, *JAK2*, *CHRNA9*, and *KIAA0467*. We have observed greater than 1% mutant allele frequency in 10 of them (not in *KIAA0467*). We have found notable expression differences in the mutant allele in *CHRNA9*



between brain metastasis (3%) and primary xenograft passage 1 (17%) used for whole genome sequencing (Supplementary Table 16).

### **Screening for recurrent somatic mutations in additional breast primary tumor and metastasis samples**

PCR-based 3730 sequencing was performed on 115 additional primary tumors (62 with matched normal) and 65 metastatic tumors (0 with matched normal) for validated point mutations and small indels. The breakdown of the samples is described below.

#### Primary Tumor:

\* Basal

2 matched

32 unmatched

\* Her2

3 matched

\* Her2-E

9 unmatched

\* Luminal B

49 matched

2 unmatched (these are potentially 2 pairs but the "matched" normal has a discrepant Participant ID)

7 unmatched

\* Luminal A

6 unmatched

\* Normal

2 unmatched

\* Unknown

0

Total = 112 (54 matched [for CHGB screening, 55 matched were used]; 58 unmatched)

### Metastatic tumor:

- \* 53 unmatched
- \* 14 unmatched (from 7 individuals)
- \* 6 unmatched (potentially from 3 individuals)

Total = 73 (0 matched)

### **Screening for recurrently mutated genes in additional breast tumors**

We screened the coding exons for 9 genes (*MAP3K8*, *GUK1*, *NRG1*, *IRAK2*, *JAK2*, *PTPRJ*, *WWTR1*, *CSMD1*, and *NRK*) in 116 breast tumors to identify additional mutations. Matched normals were sequenced to determine somatic status. Significantly mutated gene test was performed as described previously(6). The background mutation rate ( $1 \times 10^{-06}$ ) used in this analysis was based on a previous report(7).

Subtype classification of 116 tumor samples:

- 2 are normal subtype (pathology status = malignant)
- 5 are basal subtype
- 4 are Her2 subtype
- 42 are Luminal A subtype
- 63 are Luminal B subtype

### Recurrent Screening

To identify recurrent functional somatic mutations in the nine genes where validated somatic mutations were identified in the original sample quartet, a panel of 116 additional tumor samples were selected. The panel consisted the following sample subtypes: 63 luminal B, 42 luminal A subtype samples, 5 basal subtype, 4 Her2 subtype, and 2 normal subtype. A total of 271 primer pairs were designed to target all coding exons from Ensembl database release 45 and the corresponding version of GenBank from *CSMD1*, *GUK1*, *IRAK2*, *JAK2*, *MAP3K8*, *NRG1*, *NRK*,

*PTPRJ*, and *WWTR1*. All 116 new tumor samples in addition to the original quartet were individually amplified with PCR using the standard Amplitaq Gold protocol and subsequently sequenced with Big Dye Terminators on the ABI 3730xl capillary sequencer. Nine Consed gene-based assemblies were created using crossmatch alignments of Phred basecalled scf files. The aligned and assembled data were processed with PolyScan and PolyPhred to identify novel, potentially somatic SNVs and Indels that would result in translational changes affecting the amino acid sequence of the protein according to Ensembl and GenBank transcript annotation. (Annotation types: missense, nonsense, frameshift, in-frame, splice site, non-start, non-stop/readthrough). Known germline variants from dbSNP130 were filtered and remaining putative variants were reamplified and resequenced using both the tumor and matched normal DNA in order to validate the variants and determine somatic status.

### **Array CGH Methodology**

Agilent's aCGH platform uses a two-color competitive hybridization process to measure genome-wide DNA variation between two samples. Genomic DNAs from both a tumor and germline reference sample treated by restriction digestion (*AluI/RsaI*), then fluorescently labeled with either a Cy5 dye (tumor) or a Cy3 dye (germline reference), and the resulting DNA is column purified using the Bioprime Total Genomic Labeling System from Invitrogen (18097-011). Both tumor and germline purified samples are co-hybridized to an Agilent Human Genome 244K CGH array and washed according to Agilent protocols. Fluorescent signals are then extracted for each array feature using an Agilent scanner and Feature Extraction software, v9.1. We obtained aCGH data for metastasis and xenograft.

### **Illumina Array**

We followed Illumina protocols to use Illumina 1M duo arrays for peripheral blood, primary tumor, and metastasis.

### **Identification of genomic regions with copy number alterations in primary tumor, metastasis, and xenograft**

Our in-house algorithm cnvHMM (unpublished) was used to identify copy number alterations genome-wide. The numbers of confidently mapped reads (mapping quality > 35) in 5kb non-

overlapping windows were extracted from both the tumor and the normal genomes. Copy number segments were obtained using a Hidden Markov Model (HMM) that models the distribution of read counts as functions of the underlying copy number and the purity of the DNA. The log likelihood ratio score (likelihood of being a copy number altered segment/likelihood of being a copy number neutral segment, LLR) was calculated for each copy number segment of each sample. The likelihood is estimated by HMM and is the product of emission probabilities and transition probabilities. It summarizes both the observed read counts and the length of the segments. An LLR score of 10 was used as the cutoff for selecting regions with copy number alterations.

### **Correlation Analysis of Copy Number Estimations from array CGH, Illumina SNP array, and whole genome sequencing**

Copy number data computed from Illumina SNP array, array CGH and whole genome sequencing have different chromosome coordinate systems. To merge these datasets, we mapped aCGH and Illumina data onto the windows used in the analysis of whole genome sequencing data. Since coordinate ranges for probes used in aCGH are much smaller than the 10kb windows used in the depth analysis of the whole genome sequencing data, the start positions of the aCGH probes have been used for mapping. A Pearson correlation test was used in this analysis.

### **Structural variations (SVs) prediction using BreakDancer and de novo assembly of SVs**

We performed SV detection using paired-end sequence data obtained from tumor and normal samples using BreakDancer(8). Multiple libraries were constructed from the genomic DNA of tumor and normal cells with insert sizes ranging from 117 bp to 387 bp. Empirical insert size distributions were obtained from the mapping results. All libraries had unimodal insert size distributions, although the standard deviation (SD) varied across libraries. In this experiment, all anomalous read pairs (ARPs) were required to have a Maq mapping quality greater than 35 with a separation distance exceeding 4 SD, or be in an unexpected orientation. SVs receiving minimal confidence scores (60 for deletions, and 90 for insertions, inversions, and translocations) and supported only by the tumor reads were selected for downstream analysis.

We performed de novo assembly for all predicted deletions, insertions, and inversions using an in-house assembler Tigra (unpublished) and for translocations using Phrap (<http://www.phrap.org/>). We used SAMtools to extract all Maq-mapped reads within 500-1,000 bp of each predicted breakpoint. Unmapped reads with mates mapping to the SV region were also included. For Tigra assembly, we used a kmer size of 25 and a minimal coverage of 2 to help remove tips caused by potential sequencing errors. Tigra confidence scores were defined as the N50 size of the local assembly/size of the region from where the reads were extracted. For Phrap assembly, the Illumina quality values were converted to Phred-like values as described online (<http://maq.sourceforge.net/fastq.shtml>). Assemblies were performed with Phrap version 1.080721 using the following parameters: -minscore 20 -vector\_bound 0 -bandwidth 2 -max\_group\_size 0 -view -revise\_greedy. All resulting contigs from both assemblers were compared to the SV region (+/- 500-1000 bp of breakpoints) from human NCBI Build 36 using cross\_match.

### **Criteria for defining breakpoints and SV types using assembled contigs**

1. Indel-containing contigs had two alignments in the same orientation and the alignment boundaries defined the indel breakpoints.
2. Overlapping alignments indicated direct repeats in the reference that were involved in the event.
3. Contigs with a single alignment to the reference were checked for smaller indels.
4. Contigs containing translocation breakpoints had alignments to both chromosomes.
5. Contigs spanning the entire inversion had three alignments, the middle of which is in the opposite orientation from the outer two.
6. If the inversion was larger than the contig size, only one inversion breakpoint was present. In this case, the contig had two alignments in the opposite orientation. A second contig defining the other inversion breakpoint was expected. The breakpoint positions on the reference indicated the inversion size.

### **Identify breakpoint reads by read remapping and assign tissue sources for SVs**

For assembled and/or validated SVs, we used SAMtools to extract all Maq-mapped reads within 500-1,000 bp of each breakpoint and unmapped reads with mates mapping to the SV region.

Then we mapped the reads to SV-containing contigs using `cross_match`. Reads crossing breakpoints of SV contigs were tallied. The number of reads spanning the breakpoints but supporting the reference allele was also recorded. In addition, we annotated the tissue source of the reads supporting the reference or SV allele for determining the source of SVs. Specifically, we obtained all reads that mapped within 500 bp of SV breakpoints and generated contigs using the NCBI Build 36 reference sequence +/- 500 bp of each SV breakpoint. Then, we aligned reads with a Maq alignment score of 30 or greater to assembled SV contigs and to reference sequence using `cross_match` (parameters: `-discrep_lists -alignments -minmatch 10 -maxmatch 10 -minscore 15`).

We filtered read to contig/reference hits as follows:

1. A read could not have  $\geq 5$  bp of unaligned bases on its ends.
2. `cross_match` score  $\geq 20$  was required.
3. If `cross_match` scores were between 20 to 30, no substitutions were allowed.
4. If `cross_match` score is  $> 30$ , 4% substitutions were allowed.
5. Reads supported the SV if the read crossed the breakpoint with at least 2 extra bases and the read did not align to the reference sequence.

### **Pairoscope-based manual review of translocations**

We selected translocations supported by at least 5 read pairs and 2 libraries for further study. Translocations were manually reviewed using the “Pairoscope graph”. Pairoscope is a software package that was developed to provide a means to visualize the read pairs in regions of a genome, along with the read depth and gene structure, that have been identified as containing a structural variant. Manual reviewers evaluated the read pair mapping patterns in normal, primary tumor, brain metastasis, and xenograft to eliminate false predictions.

### **Validation of SVs by PCR followed by ABI 3730 and 454 sequencing**

For small insertions, small inversions, and deletions of most sizes, PCR primers were designed approximately 100-200 bp outside the boundaries of the breakpoints defined by BreakDancer. For large inversions, a total of 4 primers were designed for 2 breakpoints and 2 independent PCR reactions targeting 2 breakpoints were performed. For translocations, a total of 4 primers that

reside 5' and 3' from the predicted breakpoints were designed for each prediction and all 6 possible combinations of the 4 primers were used for PCR amplification to determine the efficiency of the primers and the orientations of the translocation. SVs were considered validated if any single resulting read sequence spanned the predicted breakpoints. All PCR products were evaluated on a 2% agarose gel. Regardless of yield, all products were sequenced in both directions using Big Dye Terminator reactions and subsequently loaded on an ABI 3730 capillary sequencer. The resulting traces were assembled onto an SV-containing reference sequence extracted from the region surrounding the predicted SV site on NCBI Build 36 with an additional 500-1,000 bp of flanking 3' and 5' sequence. All resulting diploid trace data were manually reviewed and those traces showing unambiguous evidence of homozygous or heterozygous SVs were classified as either somatic or germline events, or were alternatively labeled as variants if the somatic status could not be determined due to lack of sequence data from the matched normal sample. In addition, all 3730 traces were aligned to NCBI Build 36 using `cross_match` for classifying SV events using the same standards as those used in manual review. Moreover, we pooled all PCR products from normal, primary tumor, brain metastasis, and xenograft independently and sequenced the four pools on the Roche 454 platform. The 454 reads were analyzed through the manufacturer's primary pipeline, and aligned to the NCBI Build 36 reference sequence using `cross_match`. The alignments were interpreted as described in the "Criteria for defining breakpoints and SV types using assembled contigs" section above.

The overlap of point mutation, indel, and SV between primary tumor, metastasis, and xenograft is shown in Supplementary Figure 2.

## **B. Supplementary Figures**



Supplementary Figure 1

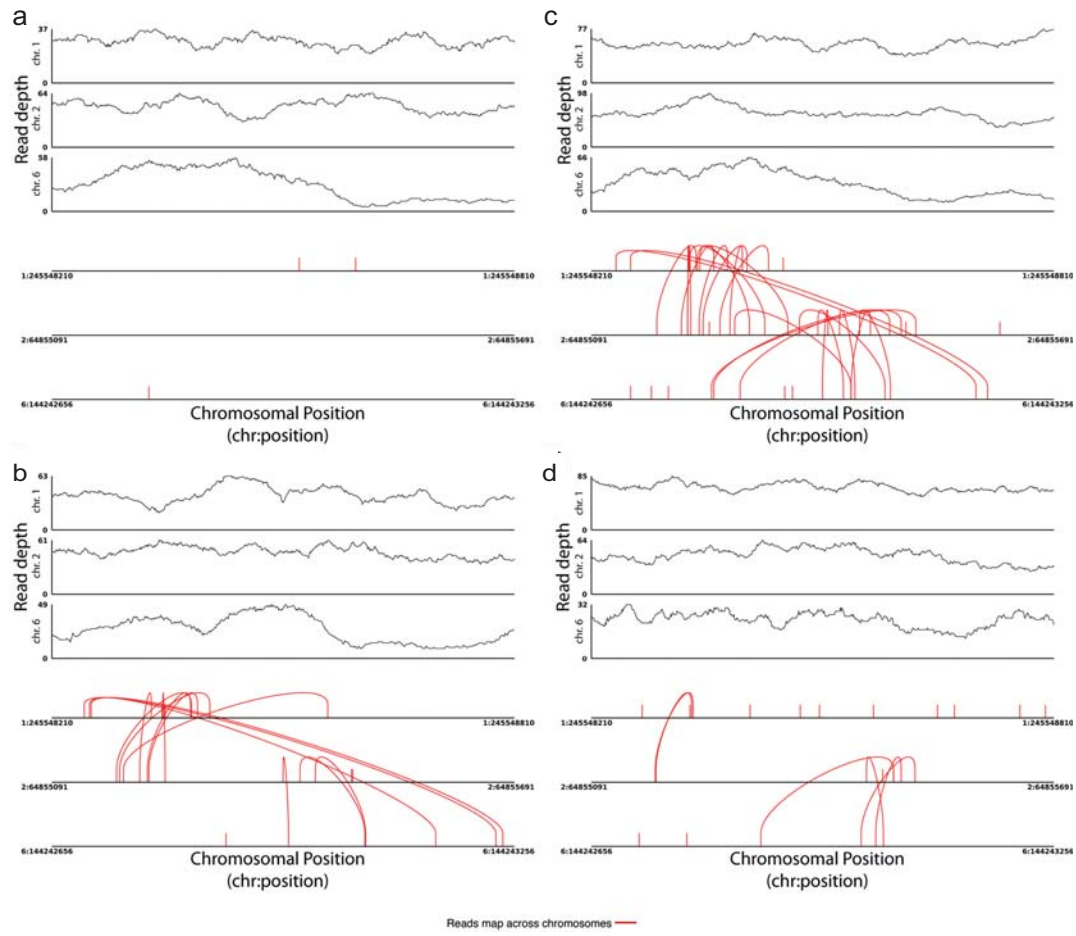

Supplementary Figure 2

**Point Mutation, Indel, and SV overlap  
between primary tumor, metastasis,  
and xenograft samples**

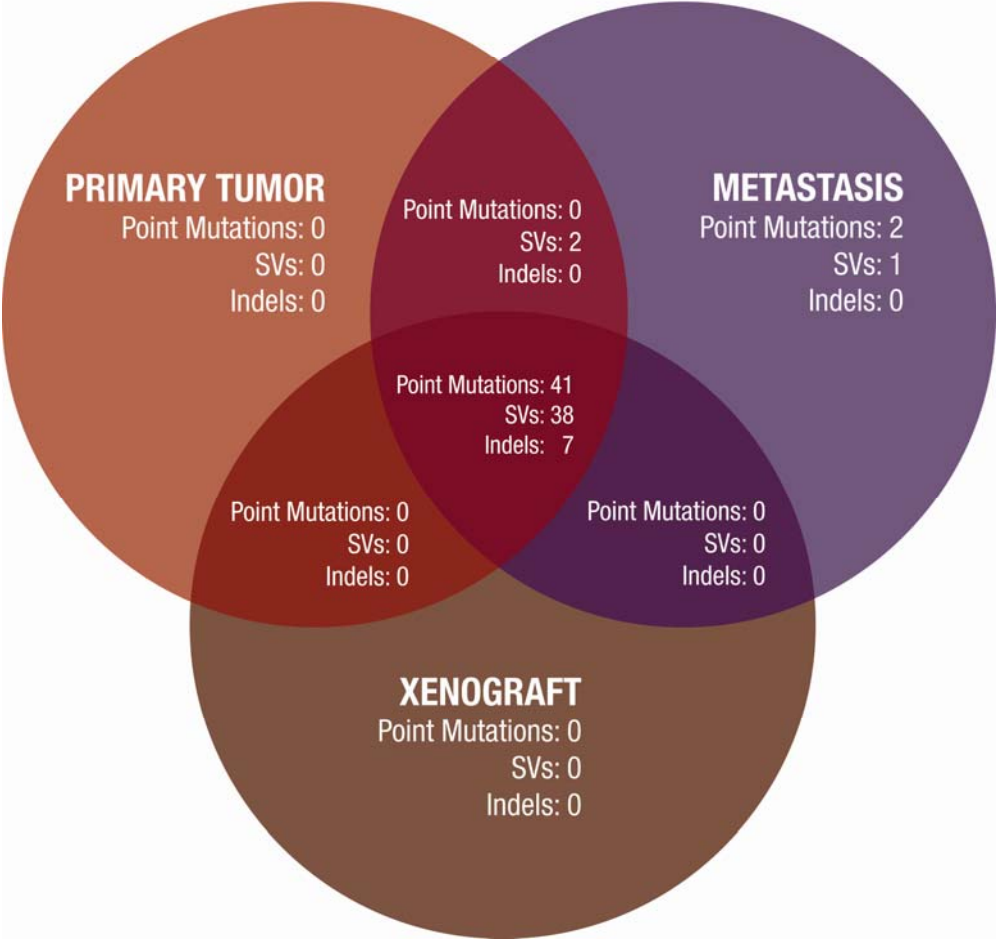

## C. Supplementary Figure Legends

**Supplementary Figure 1.** Three linked translocations. A graph of read pairs in a 1,000 bp region containing 3 separate translocations for the normal (a), the primary tumor (b), the metastasis (c), and the xenograft (d). The top sections display the read depth at each base. The bottom sections show each read within the region whose mate mapped to a different chromosome as red bars, with matched pairs connected by arcs.

**Supplementary Figure 2.** The overlap of point mutation, indel, and SV between primary tumor, metastasis, and xenograft.

## **D. Supplementary Tables**

**Supplementary Table 1.** Genomic Coverage

|                             | Blood     | Primary Tumor | Brain Metastasis | Xenograft |
|-----------------------------|-----------|---------------|------------------|-----------|
| Bases Sequenced (Gbp)       | 130.7     | 124.9         | 111.8            | 149.2     |
| SNVs detected               | 4,325,512 | 4,121,595     | 3,860,638        | 3,626,361 |
| Concordance with dbSNP      | 78.54%    | 78.87%        | 79.00%           | 79.48%    |
| Estimated Haploid Coverage  | 38.8X     | 29.0X         | 32.0X            | 23.8X     |
| Known Heterozygote Coverage | 98.27%    | 96.79%        | 96.17%           | 88.77%    |
| Known Homozygote Coverage   | 99.28%    | 93.70%        | 97.15%           | 98.70%    |

**Supplementary Table 2a.** The process for selecting candidate somatic SNVs in primary tumor, brain metastasis, and xenograft. Identification of somatic mutations. Putative somatic variants were separated from germline variants as shown in the primary tumor, the brain metastasis and the mouse xenograft. Variants are listed as validated in each column if they were somatic in any of the three samples.

| Category                     | Primary Tumor | Metastasis | Xenograft |
|------------------------------|---------------|------------|-----------|
| Tumor SNVs detected          | 4,967,429     | 4,647,103  | 4,489,151 |
| SNVs passing maq SNP filter  | 4,121,595     | 3,860,638  | 3,618,536 |
| SNVs described previously    | 3,540,263     | 3,321,746  | 3,144,926 |
| Novel SNVs                   | 581,332       | 538,892    | 473,610   |
| SNVs also detected in normal | 554,159       | 487,182    | 361,361   |
| SNVs called in NOD/Scid      | —             | —          | 3,171     |
| Novel potential somatic SNVs | 27,173        | 51,710     | 109,078   |
| LOH SNVs                     | 2,007         | 21,690     | 83,763    |
| SNVs unable to be classified | 1,394         | 1,712      | 1,757     |
| Tier1 SNVs                   | 200           | 225        | 328       |
| Tier1 HC SNVs                | 28            | 46         | 100       |
| Tier1 LC SNVs                | 172           | 179        | 228       |
| Tier1 HC SNVs passing review | —             | —          | 54        |
| Tier1 LC SNVs passing review | 39            | 19         | —         |
| Tier1 Validated HC SNVs      | 16            | 33         | 37        |
| Tier1 Validated LC SNVs      | 6             | 3          | 0         |
| Tier2 SNVs                   | 911           | 1,059      | 1,475     |
| Tier 2 HC SNVs               | 185           | 313        | 675       |
| Tier3 SNVs                   | 4,503         | 5,754      | 4,832     |
| Tier3 HC SNVs                | 920           | 1,689      | 2,287     |
| Tier4 SNVs                   | 18,158        | 21,270     | 16,923    |
| Tier4 HC SNVs                | 2,239         | 3,751      | 4,497     |

**Supplementary Table 2b.** The process for selecting candidate somatic Indels in primary tumor, brain metastasis, and xenograft. Putative somatic variants were separated from germline variants as shown in the primary tumor, the brain metastasis and the mouse xenograft. Variants are listed as validated in each column if they were somatic in any of the three samples.

| Category                                                   | Primary Tumor | Metastasis | Xenograft |
|------------------------------------------------------------|---------------|------------|-----------|
| Tumor indels detected                                      | 4,396,160     | 4,684,771  | 3,604,771 |
| Indels with multiple library support                       | 631,536       | 782,629    | 438,603   |
| Indels detected in the normal                              | 571,137       | 628,891    | 418,678   |
| Novel indels                                               | 60,399        | 85,042     | 19,925    |
| 1 bp indels without 10% of total tumor coverage as support | 14,453        | 23,185     | 81        |
| Novel potential somatic indels                             | 45,946        | 61,857     | 19,844    |
| Tier 1 indels                                              | 98            | 106        | 128       |
| Tier1 indels passing review                                | 48            | 59         | 91        |
| Tier1 Validated HC SNVs                                    | 4             | 7          | 0         |
| Tier2 indels                                               | 1070          | 1,439      | 1,780     |
| Tier 2 HC indels                                           | 57            | 75         | 126       |
| Tier3 indels                                               | 6,973         | 9,482      | 5,613     |
| Tier3 HC indels                                            | 457           | 500        | 281       |
| Tier4 indels                                               | 40,512        | 59,560     | 12,238    |
| Tier4 HC indels                                            | 1,161         | 1,446      | 409       |

**Supplementary Table 2c.** The process for selecting candidate metastasis specific somatic SNVs.

| Category                                 | Metastasis |
|------------------------------------------|------------|
| Tumor SNVs detected                      | 4,647,103  |
| SNVs passing maq SNP filter              | 3,860,638  |
| SNVs described previously                | 3,321,746  |
| Novel SNVs                               | 538,892    |
| SNVs also detected in primary tumor      | 488,697    |
| SNVs called in NOD/Scid                  | —          |
| Novel potential metastasis-enriched SNVs | 50,195     |
| LOH SNVs                                 | 18,062     |
| SNVs unable to be classified             | 1,467      |
| Tier1 SNVs                               | 221        |
| Tier1 HC SNVs                            | 18         |
| Tier1 LC SNVs                            | 203        |
| Tier1 HC SNVs passing review             | —          |
| Tier1 LC SNVs passing review             | 48         |
| Tier1 Validated HC SNVs                  | 7          |
| Tier1 Validated LC SNVs                  | 2          |
| Tier2 SNVs                               | 1,244      |
| Tier 2 HC SNVs                           | 137        |
| Tier3 SNVs                               | 6,332      |
| Tier3 HC SNVs                            | 824        |
| Tier4 SNVs                               | 22,869     |
| Tier4 HC SNVs                            | 2,301      |



**Supplementary Table 2d.** The process for selecting candidate metastasis specific somatic Indels.

| Category                                                   | Metastasis |
|------------------------------------------------------------|------------|
| Tumor indels detected                                      | 4,684,771  |
| Indels with multiple library support                       | 782,629    |
| Indels detected in the primary tumor                       | 681,071    |
| Novel indels                                               | 101,198    |
| 1 bp indels without 10% of total tumor coverage as support | 15,700     |
| Novel potential metastasis-enriched indels                 | 85,498     |
| Tier 1 indels                                              | 155        |
| Tier1 indels passing review                                | 63         |
| Tier1 Validated HC SNVs                                    | 3          |
| Tier2 indels                                               | 1768       |
| Tier 2 HC indels                                           | 21         |
| Tier3 indels                                               | 11,845     |
| Tier3 HC indels                                            | 112        |
| Tier4 indels                                               | 61,054     |
| Tier4 HC indels                                            | 534        |

**Supplementary Table 3a.** Illumina and 454 deep read count and corrected readcount for 50 somatic sites in excel spreadsheet.

**Supplementary Table 3b.** Summary of 50 somatic point mutations and small indels identified in the primary tumor, brain metastasis, and xenograft in excel spreadsheet.

**Supplementary Table 4.** Recurrent screening identified 4 *CSMD1* and 1 *JAK2* mutations.

| <b>Chromosome</b> | <b>Genomic position</b> | <b>NCBI build</b> | <b>Gene</b> | <b>Reference allele</b> | <b>Variant allele</b> |
|-------------------|-------------------------|-------------------|-------------|-------------------------|-----------------------|
| 8                 | 3193010                 | 36                | CSMD1       | G                       | A                     |
| 8                 | 2996427                 | 36                | CSMD1       | C                       | G                     |
| 8                 | 2842969                 | 36                | CSMD1       | A                       | G                     |
| 8                 | 2783657                 | 36                | CSMD1       | C                       | T                     |
| 9                 | 5116757                 | 36                | JAK2        | G                       | C                     |

**Supplementary Table 5.** Summary of regions with significant copy number alterations in primary tumor.

| Chromosome | Start position | End position | Size    | Number of markers | HMM state | Copy Number | LLR score |
|------------|----------------|--------------|---------|-------------------|-----------|-------------|-----------|
| 1          | 0              | 790000       | 790000  | 62                | 0         | 0.21        | 40.36     |
| 1          | 1250000        | 1660000      | 410000  | 42                | 0         | 0.63        | 14.96     |
| 1          | 12760000       | 13650000     | 890000  | 72                | 0         | 0.16        | 47.57     |
| 1          | 83370000       | 83720000     | 350000  | 36                | 0         | 0.47        | 17.58     |
| 1          | 103570000      | 104090000    | 520000  | 41                | 0         | 0.48        | 20.4      |
| 1          | 108560000      | 108830000    | 270000  | 28                | 0         | 0.48        | 13.6      |
| 1          | 115710000      | 115920000    | 210000  | 22                | 0         | 0.25        | 13.62     |
| 1          | 120340000      | 120730000    | 390000  | 34                | 0         | 0.36        | 19.3      |
| 1          | 141600000      | 142710000    | 1110000 | 82                | 0         | 0.35        | 44.7      |
| 1          | 142730000      | 143220000    | 490000  | 32                | 0         | 0.16        | 21.88     |
| 1          | 143270000      | 143620000    | 350000  | 19                | 0         | 0.27        | 11.71     |
| 1          | 144470000      | 144870000    | 400000  | 35                | 0         | 0.16        | 23.88     |
| 1          | 145880000      | 146160000    | 280000  | 29                | 0         | 0.04        | 21.59     |
| 1          | 146310000      | 147220000    | 910000  | 74                | 0         | 0.39        | 41.89     |
| 1          | 147520000      | 148100000    | 580000  | 53                | 0         | 0.51        | 26.71     |
| 1          | 241120000      | 241430000    | 310000  | 32                | 0         | 0.85        | 10        |
| 2          | 86920000       | 88070000     | 1150000 | 116               | 0         | 0.2         | 74.87     |
| 2          | 89060000       | 89370000     | 310000  | 32                | 0         | 0.44        | 15.96     |
| 2          | 89590000       | 89950000     | 360000  | 37                | 0         | 0.57        | 15.89     |
| 2          | 91200000       | 91620000     | 420000  | 43                | 0         | 0.45        | 20.67     |
| 2          | 95440000       | 96080000     | 640000  | 65                | 0         | 0.84        | 17.19     |
| 2          | 97040000       | 97610000     | 570000  | 56                | 0         | 0.47        | 26.85     |
| 2          | 109820000      | 110170000    | 350000  | 36                | 0         | 0.02        | 27.05     |
| 2          | 110520000      | 111100000    | 580000  | 43                | 0         | 0.04        | 31.9      |
| 2          | 111730000      | 112080000    | 350000  | 36                | 0         | 0.27        | 21.73     |
| 2          | 113860000      | 114130000    | 270000  | 28                | 0         | 0.36        | 15.41     |
| 2          | 130870000      | 131180000    | 310000  | 32                | 0         | 0.09        | 22.63     |
| 2          | 132240000      | 132680000    | 440000  | 45                | 0         | 0.58        | 18.25     |
| 2          | 242170000      | 242350000    | 180000  | 19                | 0         | 0.04        | 14.1      |
| 3          | 46320000       | 46460000     | 140000  | 15                | 0         | 0.09        | 10.61     |
| 3          | 68010000       | 68140000     | 130000  | 14                | 0         | 0.05        | 10.28     |
| 3          | 76320000       | 76480000     | 160000  | 17                | 0         | 0.08        | 12.25     |
| 3          | 121760000      | 121900000    | 140000  | 15                | 0         | 0.09        | 10.69     |
| 4          | 8960000        | 9360000      | 400000  | 41                | 0         | 0.51        | 12.64     |
| 4          | 68910000       | 69620000     | 710000  | 61                | 0         | 0.21        | 39.44     |
| 4          | 132800000      | 133120000    | 320000  | 33                | 0         | 0.78        | 10.75     |
| 5          | 12840000       | 13250000     | 410000  | 42                | 0         | 0.11        | 29.72     |
| 5          | 20730000       | 20970000     | 240000  | 25                | 0         | 0.62        | 10.61     |
| 5          | 34110000       | 34430000     | 320000  | 33                | 0         | 0.54        | 15.35     |

|    |           |           |         |     |   |      |        |
|----|-----------|-----------|---------|-----|---|------|--------|
| 5  | 68860000  | 71160000  | 2300000 | 231 | 0 | 0.14 | 155.7  |
| 5  | 175260000 | 175480000 | 220000  | 23  | 0 | 0.29 | 13.15  |
| 5  | 176980000 | 177410000 | 430000  | 44  | 0 | 0.41 | 22.2   |
| 5  | 180190000 | 180330000 | 140000  | 15  | 0 | 0.09 | 10.64  |
| 6  | 9100000   | 9350000   | 250000  | 20  | 0 | 0.03 | 14.91  |
| 6  | 26790000  | 27070000  | 280000  | 29  | 0 | 0.6  | 12.27  |
| 6  | 57800000  | 58820000  | 1020000 | 97  | 0 | 0.89 | 22.68  |
| 6  | 115340000 | 115680000 | 340000  | 35  | 0 | 0.03 | 26.21  |
| 6  | 157510000 | 157980000 | 470000  | 42  | 0 | 0.01 | 31.71  |
| 6  | 167690000 | 168030000 | 340000  | 32  | 0 | 0.21 | 19.66  |
| 7  | 56780000  | 57190000  | 410000  | 36  | 0 | 0.37 | 19.45  |
| 7  | 61110000  | 61240000  | 130000  | 14  | 0 | 0.07 | 10.1   |
| 7  | 62330000  | 62730000  | 400000  | 41  | 0 | 0.34 | 23.09  |
| 7  | 64600000  | 64880000  | 280000  | 29  | 0 | 0.65 | 10.96  |
| 7  | 72050000  | 72350000  | 300000  | 31  | 0 | 0.12 | 21.3   |
| 7  | 73790000  | 74980000  | 1190000 | 94  | 0 | 0.14 | 63.32  |
| 7  | 75910000  | 76640000  | 730000  | 74  | 0 | 0.45 | 35.83  |
| 7  | 101910000 | 102220000 | 310000  | 32  | 0 | 0.24 | 19.42  |
| 7  | 142940000 | 143190000 | 250000  | 26  | 0 | 0.24 | 16.19  |
| 7  | 143510000 | 143690000 | 180000  | 19  | 0 | 0.12 | 13.07  |
| 7  | 149230000 | 149620000 | 390000  | 40  | 0 | 0.65 | 14.46  |
| 8  | 0         | 140000    | 140000  | 15  | 0 | 0.09 | 10.68  |
| 8  | 6930000   | 8100000   | 1170000 | 107 | 0 | 0.18 | 69.46  |
| 8  | 11900000  | 12430000  | 530000  | 43  | 0 | 0.45 | 20.87  |
| 9  | 0         | 180000    | 180000  | 19  | 0 | 0.24 | 11.96  |
| 9  | 38760000  | 47100000  | 8340000 | 733 | 0 | 0.07 | 529.71 |
| 9  | 65230000  | 66550000  | 1320000 | 109 | 0 | 0.13 | 74.25  |
| 9  | 66680000  | 67880000  | 1200000 | 103 | 0 | 0.17 | 68.3   |
| 9  | 67940000  | 70210000  | 2270000 | 186 | 0 | 0.14 | 125.07 |
| 10 | 17830000  | 18250000  | 420000  | 37  | 0 | 0.05 | 27.4   |
| 10 | 45490000  | 46370000  | 880000  | 73  | 0 | 0.07 | 52.3   |
| 10 | 46580000  | 47910000  | 1330000 | 86  | 0 | 0.08 | 59.98  |
| 10 | 48280000  | 49050000  | 770000  | 62  | 0 | 0.04 | 45.88  |
| 10 | 50720000  | 51660000  | 940000  | 83  | 0 | 0.36 | 45.09  |
| 10 | 80920000  | 81660000  | 740000  | 73  | 0 | 0.09 | 52.02  |
| 10 | 88730000  | 89240000  | 510000  | 52  | 0 | 0.4  | 26.98  |
| 11 | 89020000  | 89460000  | 440000  | 45  | 0 | 0.27 | 26.96  |
| 13 | 17930000  | 18340000  | 410000  | 42  | 0 | 0.39 | 20.82  |
| 13 | 51670000  | 52060000  | 390000  | 40  | 0 | 0.75 | 11.03  |
| 14 | 18130000  | 18490000  | 360000  | 37  | 0 | 0.27 | 22.12  |
| 14 | 18550000  | 19250000  | 700000  | 71  | 0 | 0.19 | 46.05  |

|    |          |          |         |     |   |      |       |
|----|----------|----------|---------|-----|---|------|-------|
| 15 | 18280000 | 19660000 | 1380000 | 139 | 0 | 0.58 | 53.96 |
| 15 | 20660000 | 21180000 | 520000  | 47  | 0 | 0.15 | 31.53 |
| 15 | 26110000 | 26890000 | 780000  | 68  | 0 | 0.28 | 40.07 |
| 15 | 28160000 | 28890000 | 730000  | 74  | 0 | 0.27 | 44.28 |
| 15 | 30230000 | 30700000 | 470000  | 48  | 0 | 0.09 | 33.91 |
| 15 | 80270000 | 81000000 | 730000  | 67  | 0 | 0.19 | 43.6  |
| 15 | 82530000 | 82900000 | 370000  | 31  | 0 | 0.56 | 13.04 |
| 16 | 14690000 | 15390000 | 700000  | 71  | 0 | 0.4  | 36.41 |
| 16 | 16200000 | 16750000 | 550000  | 56  | 0 | 0.18 | 36.45 |
| 16 | 18080000 | 18690000 | 610000  | 62  | 0 | 0.16 | 41.05 |
| 16 | 21260000 | 21460000 | 200000  | 21  | 0 | 0.4  | 10.64 |
| 16 | 21660000 | 21850000 | 190000  | 20  | 0 | 0.2  | 12.75 |
| 16 | 22350000 | 22520000 | 170000  | 18  | 0 | 0.15 | 11.95 |
| 16 | 28250000 | 28380000 | 130000  | 14  | 0 | 0.05 | 10.25 |
| 16 | 28530000 | 28720000 | 190000  | 20  | 0 | 0.14 | 13.42 |
| 16 | 28950000 | 29720000 | 770000  | 78  | 0 | 0.58 | 31.56 |
| 16 | 31850000 | 32390000 | 540000  | 55  | 0 | 0.41 | 27.86 |
| 16 | 32570000 | 33260000 | 690000  | 70  | 0 | 0.18 | 46.09 |
| 16 | 33540000 | 33760000 | 220000  | 23  | 0 | 0.33 | 12.88 |
| 17 | 15370000 | 15730000 | 360000  | 37  | 0 | 0.62 | 14.26 |
| 17 | 16510000 | 16700000 | 190000  | 20  | 0 | 0.36 | 10.71 |
| 17 | 18230000 | 18680000 | 450000  | 46  | 0 | 0.3  | 26.56 |
| 17 | 18870000 | 19070000 | 200000  | 21  | 0 | 0.02 | 15.76 |
| 17 | 20160000 | 20750000 | 590000  | 60  | 0 | 0.65 | 22.01 |
| 17 | 31510000 | 31880000 | 370000  | 27  | 0 | 0.02 | 20.25 |
| 17 | 33290000 | 33720000 | 430000  | 33  | 0 | 0.24 | 20.14 |
| 17 | 36350000 | 36530000 | 180000  | 19  | 0 | 0.04 | 14.03 |
| 17 | 41650000 | 42130000 | 480000  | 49  | 0 | 0.13 | 33.35 |
| 18 | 14110000 | 15400000 | 1290000 | 130 | 0 | 0.74 | 41.89 |
| 19 | 30000    | 200000   | 170000  | 18  | 0 | 0.11 | 12.68 |
| 21 | 13290000 | 14320000 | 1030000 | 104 | 0 | 0.52 | 44.55 |
| 22 | 14450000 | 15760000 | 1310000 | 116 | 0 | 0.46 | 56.77 |
| 22 | 17020000 | 17330000 | 310000  | 32  | 0 | 0.42 | 16.11 |
| 22 | 18670000 | 19050000 | 380000  | 33  | 0 | 0.15 | 22.09 |
| 22 | 19790000 | 20240000 | 450000  | 46  | 0 | 0.14 | 30.96 |
| X  | 3700000  | 3950000  | 250000  | 26  | 0 | 0    | 19.83 |
| X  | 52120000 | 52580000 | 460000  | 41  | 0 | 0.03 | 30.55 |
| X  | 71880000 | 72110000 | 230000  | 24  | 0 | 0.08 | 17.16 |
| X  | 76150000 | 76450000 | 300000  | 31  | 0 | 0.1  | 21.91 |
| X  | 76610000 | 77330000 | 720000  | 73  | 0 | 0.12 | 50.39 |
| X  | 88340000 | 90160000 | 1820000 | 183 | 0 | 0.41 | 92.26 |

|    |           |           |          |      |   |      |        |
|----|-----------|-----------|----------|------|---|------|--------|
| X  | 90630000  | 92250000  | 1620000  | 163  | 0 | 0.43 | 80.75  |
| X  | 101330000 | 101620000 | 290000   | 30   | 0 | 0.12 | 20.57  |
| 2  | 165130000 | 168230000 | 3100000  | 311  | 1 | 1.42 | 15.74  |
| 2  | 179540000 | 190730000 | 11190000 | 1120 | 1 | 1.41 | 59.62  |
| 2  | 192520000 | 199670000 | 7150000  | 716  | 1 | 1.4  | 38.71  |
| 2  | 208860000 | 215860000 | 7000000  | 701  | 1 | 1.42 | 35.33  |
| 3  | 82850000  | 86500000  | 3650000  | 366  | 1 | 1.56 | 10.9   |
| 3  | 163570000 | 168090000 | 4520000  | 453  | 1 | 1.54 | 16.22  |
| 4  | 70000     | 3530000   | 3460000  | 341  | 1 | 1.12 | 19.95  |
| 4  | 10000000  | 36800000  | 26800000 | 2666 | 1 | 1.23 | 170.78 |
| 4  | 42670000  | 48770000  | 6100000  | 611  | 1 | 1.38 | 28.82  |
| 5  | 49460000  | 53100000  | 3640000  | 365  | 1 | 1.42 | 21.63  |
| 5  | 61540000  | 65520000  | 3980000  | 399  | 1 | 1.49 | 15.38  |
| 5  | 80740000  | 94950000  | 14210000 | 1417 | 1 | 1.47 | 66.26  |
| 5  | 96510000  | 110950000 | 14440000 | 1441 | 1 | 1.42 | 87.51  |
| 5  | 116310000 | 123290000 | 6980000  | 699  | 1 | 1.5  | 25.99  |
| 5  | 127360000 | 131310000 | 3950000  | 396  | 1 | 1.48 | 16.65  |
| 5  | 160420000 | 166420000 | 6000000  | 601  | 1 | 1.48 | 25.19  |
| 8  | 111150000 | 115960000 | 4810000  | 482  | 1 | 1.56 | 14.68  |
| 9  | 28060000  | 32220000  | 4160000  | 417  | 1 | 1.51 | 22.59  |
| 9  | 70230000  | 85840000  | 15610000 | 1562 | 1 | 1.23 | 124.53 |
| 9  | 103410000 | 106570000 | 3160000  | 317  | 1 | 1.42 | 21.69  |
| 10 | 51680000  | 59980000  | 8300000  | 831  | 1 | 1.43 | 55.25  |
| 10 | 65550000  | 69560000  | 4010000  | 402  | 1 | 1.44 | 24.52  |
| 11 | 48360000  | 50270000  | 1910000  | 192  | 1 | 1.22 | 21.96  |
| 11 | 88160000  | 89000000  | 840000   | 85   | 1 | 1.17 | 11.64  |
| 12 | 7370000   | 11460000  | 4090000  | 410  | 1 | 1.37 | 30.78  |
| 12 | 15060000  | 25600000  | 10540000 | 1055 | 1 | 1.55 | 35.39  |
| 12 | 31090000  | 34180000  | 3090000  | 310  | 1 | 1.49 | 13     |
| 12 | 36160000  | 43670000  | 7510000  | 752  | 1 | 1.55 | 25.53  |
| 12 | 57340000  | 61280000  | 3940000  | 395  | 1 | 1.46 | 25.01  |
| 12 | 68390000  | 90670000  | 22280000 | 2203 | 1 | 1.49 | 113.36 |
| 13 | 52950000  | 72550000  | 19600000 | 1961 | 1 | 1.33 | 152.67 |
| 14 | 39630000  | 43860000  | 4230000  | 424  | 1 | 1.57 | 14.26  |
| 15 | 32460000  | 35780000  | 3320000  | 333  | 1 | 1.53 | 13.08  |
| 15 | 51570000  | 55340000  | 3770000  | 378  | 1 | 1.56 | 11.31  |
| 17 | 47680000  | 50580000  | 2900000  | 291  | 1 | 1.56 | 11.49  |
| 17 | 54130000  | 58000000  | 3870000  | 388  | 1 | 1.48 | 18.73  |
| 18 | 60180000  | 69460000  | 9280000  | 929  | 1 | 1.42 | 52.7   |
| 19 | 47900000  | 48590000  | 690000   | 70   | 1 | 1.03 | 11.83  |
| 1  | 35670000  | 43240000  | 7570000  | 758  | 3 | 3.18 | 109.9  |



|   |           |           |          |      |   |       |         |
|---|-----------|-----------|----------|------|---|-------|---------|
| 1 | 93520000  | 95910000  | 2390000  | 240  | 3 | 3.54  | 50.11   |
| 1 | 115940000 | 117680000 | 1740000  | 175  | 3 | 3.37  | 31.72   |
| 1 | 143640000 | 143820000 | 180000   | 19   | 3 | 9.78  | 33.48   |
| 1 | 144100000 | 144450000 | 350000   | 36   | 3 | 4.5   | 14.87   |
| 1 | 144950000 | 145860000 | 910000   | 92   | 3 | 4.39  | 34.59   |
| 1 | 148120000 | 159770000 | 11650000 | 1166 | 3 | 4.61  | 507.82  |
| 1 | 159920000 | 194970000 | 35050000 | 3506 | 3 | 4.16  | 1114.08 |
| 1 | 195100000 | 197900000 | 2800000  | 281  | 3 | 3.76  | 60.86   |
| 1 | 198040000 | 204180000 | 6140000  | 615  | 3 | 4.91  | 313.63  |
| 1 | 204660000 | 205750000 | 1090000  | 110  | 3 | 3.97  | 33.89   |
| 1 | 205820000 | 220700000 | 14880000 | 1489 | 3 | 3.58  | 316.85  |
| 1 | 220770000 | 221780000 | 1010000  | 102  | 3 | 3.66  | 23.85   |
| 1 | 222310000 | 226800000 | 4490000  | 450  | 3 | 3.66  | 106.5   |
| 1 | 226860000 | 240470000 | 13610000 | 1356 | 3 | 3.59  | 297.94  |
| 1 | 241450000 | 246640000 | 5190000  | 520  | 3 | 3.45  | 95.51   |
| 2 | 0         | 13180000  | 13180000 | 1301 | 3 | 3.28  | 224.43  |
| 2 | 14280000  | 18600000  | 4320000  | 427  | 3 | 3.17  | 59.82   |
| 2 | 19230000  | 34570000  | 15340000 | 1532 | 3 | 3.17  | 221.04  |
| 2 | 36200000  | 40560000  | 4360000  | 437  | 3 | 3.04  | 47.83   |
| 2 | 41460000  | 50940000  | 9480000  | 949  | 3 | 3.11  | 121.46  |
| 2 | 52660000  | 56620000  | 3960000  | 397  | 3 | 2.9   | 28.84   |
| 2 | 58490000  | 65150000  | 6660000  | 667  | 3 | 2.99  | 63.45   |
| 2 | 91130000  | 91180000  | 50000    | 6    | 3 | 14.35 | 19.09   |
| 2 | 91640000  | 91680000  | 40000    | 5    | 3 | 14.31 | 18.48   |
| 2 | 132700000 | 133200000 | 500000   | 51   | 3 | 3.77  | 20.17   |
| 4 | 48790000  | 48860000  | 70000    | 8    | 3 | 9.45  | 16.49   |
| 4 | 52380000  | 58060000  | 5680000  | 569  | 3 | 2.71  | 28.61   |
| 4 | 75870000  | 79840000  | 3970000  | 398  | 3 | 2.74  | 22.61   |
| 4 | 82330000  | 85830000  | 350000   | 351  | 3 | 2.64  | 11.36   |
| 4 | 105630000 | 116000000 | 10370000 | 1038 | 3 | 3.03  | 96.3    |
| 4 | 133140000 | 135310000 | 2170000  | 218  | 3 | 3.47  | 34.04   |
| 4 | 135910000 | 153560000 | 17650000 | 1766 | 3 | 5.56  | 1088.7  |
| 4 | 188420000 | 190910000 | 2490000  | 250  | 3 | 3.57  | 61.12   |
| 5 | 920000    | 11620000  | 10700000 | 1071 | 3 | 2.83  | 73.02   |
| 5 | 13270000  | 17560000  | 4290000  | 430  | 3 | 2.79  | 28.25   |
| 5 | 31080000  | 34090000  | 3010000  | 302  | 3 | 2.71  | 12.09   |
| 5 | 37750000  | 38960000  | 1210000  | 122  | 3 | 2.89  | 10.22   |
| 6 | 110000    | 9080000   | 8970000  | 898  | 3 | 3.13  | 149.33  |
| 6 | 9370000   | 26770000  | 17400000 | 1741 | 3 | 2.88  | 176.68  |
| 6 | 27090000  | 32040000  | 4950000  | 496  | 3 | 2.88  | 52.42   |
| 6 | 32750000  | 44810000  | 12060000 | 1207 | 3 | 2.73  | 109.8   |

|    |           |           |          |      |   |       |        |
|----|-----------|-----------|----------|------|---|-------|--------|
| 6  | 45510000  | 47500000  | 1990000  | 200  | 3 | 2.67  | 12.47  |
| 6  | 51900000  | 53980000  | 2080000  | 209  | 3 | 2.6   | 10.71  |
| 6  | 57310000  | 57780000  | 470000   | 48   | 3 | 3.9   | 21.25  |
| 6  | 58840000  | 58880000  | 40000    | 5    | 3 | 48.64 | 86.94  |
| 6  | 105640000 | 112830000 | 7190000  | 720  | 3 | 2.51  | 17.13  |
| 6  | 136380000 | 140010000 | 3630000  | 364  | 3 | 2.53  | 10.7   |
| 7  | 640000    | 5890000   | 5250000  | 526  | 3 | 3.59  | 145.51 |
| 7  | 6000000   | 6740000   | 740000   | 75   | 3 | 3.49  | 19.56  |
| 7  | 6900000   | 32610000  | 25710000 | 2572 | 3 | 3.27  | 444.57 |
| 7  | 33060000  | 35040000  | 1980000  | 199  | 3 | 3.08  | 28.2   |
| 7  | 35260000  | 43960000  | 8700000  | 871  | 3 | 3.21  | 155.08 |
| 7  | 44060000  | 45720000  | 1660000  | 167  | 3 | 3.44  | 41.54  |
| 7  | 45870000  | 55690000  | 9820000  | 973  | 3 | 3.11  | 146.39 |
| 7  | 61260000  | 62310000  | 1050000  | 94   | 3 | 2.87  | 10.97  |
| 7  | 66450000  | 71620000  | 5170000  | 518  | 3 | 3.04  | 88.7   |
| 7  | 72370000  | 73770000  | 1400000  | 141  | 3 | 2.72  | 14.46  |
| 7  | 97700000  | 99640000  | 1940000  | 195  | 3 | 2.49  | 12.22  |
| 7  | 104180000 | 106440000 | 2260000  | 227  | 3 | 2.53  | 10.9   |
| 7  | 126490000 | 127880000 | 1390000  | 140  | 3 | 2.67  | 11.97  |
| 7  | 128100000 | 135400000 | 7300000  | 731  | 3 | 2.54  | 37.83  |
| 7  | 136920000 | 142920000 | 6000000  | 597  | 3 | 2.49  | 24.27  |
| 7  | 147310000 | 149210000 | 1900000  | 191  | 3 | 2.51  | 10.24  |
| 7  | 149640000 | 151340000 | 1700000  | 171  | 3 | 2.63  | 14.07  |
| 7  | 153500000 | 158610000 | 5110000  | 493  | 3 | 2.62  | 38.7   |
| 9  | 200000    | 8280000   | 8080000  | 809  | 3 | 2.83  | 42.04  |
| 9  | 17560000  | 20390000  | 2830000  | 284  | 3 | 2.8   | 12.37  |
| 9  | 139030000 | 140130000 | 1100000  | 111  | 3 | 3.1   | 12.88  |
| 10 | 120000    | 17810000  | 17690000 | 1764 | 3 | 3.7   | 411.9  |
| 10 | 18270000  | 38550000  | 20280000 | 2029 | 3 | 3.44  | 346.56 |
| 10 | 41690000  | 41850000  | 160000   | 17   | 3 | 23.6  | 94.88  |
| 13 | 96230000  | 100630000 | 4400000  | 441  | 3 | 2.71  | 24.3   |
| 16 | 33780000  | 33930000  | 150000   | 16   | 3 | 5.86  | 17.35  |
| 16 | 44960000  | 45000000  | 40000    | 5    | 3 | 14.59 | 19.64  |
| 16 | 69280000  | 69750000  | 470000   | 48   | 3 | 6.04  | 42.57  |
| 16 | 80040000  | 85960000  | 5920000  | 593  | 3 | 2.43  | 11.19  |
| 20 | 20000     | 1490000   | 1470000  | 148  | 3 | 2.76  | 16.1   |
| 20 | 1550000   | 6850000   | 5300000  | 531  | 3 | 2.57  | 34.66  |
| 20 | 8590000   | 13270000  | 4680000  | 469  | 3 | 2.51  | 16.42  |
| 20 | 15320000  | 25680000  | 10360000 | 1037 | 3 | 2.65  | 82.81  |
| 20 | 29280000  | 52740000  | 23460000 | 2344 | 3 | 2.65  | 212.34 |
| 20 | 53920000  | 62380000  | 8460000  | 832  | 3 | 2.73  | 90.57  |

|           |           |           |          |      |   |      |       |
|-----------|-----------|-----------|----------|------|---|------|-------|
| <b>21</b> | 9730000   | 10200000  | 470000   | 48   | 3 | 4.88 | 42.5  |
| <b>21</b> | 26250000  | 27010000  | 760000   | 77   | 3 | 3.21 | 18.31 |
| <b>X</b>  | 5980000   | 20560000  | 14580000 | 1459 | 3 | 2.51 | 52.9  |
| <b>X</b>  | 37810000  | 40750000  | 2940000  | 295  | 3 | 2.74 | 29.86 |
| <b>X</b>  | 67770000  | 68710000  | 940000   | 95   | 3 | 2.87 | 12.75 |
| <b>X</b>  | 148880000 | 150910000 | 2030000  | 204  | 3 | 2.61 | 13.15 |

**Supplementary Table 6.** Summary of regions with significant copy number alterations in brain metastasis.

| Chromosome | Start position | End position | Size    | Number of markers | HMM state | Copy Number | LLR score |
|------------|----------------|--------------|---------|-------------------|-----------|-------------|-----------|
| 1          | 0              | 730000       | 730000  | 56                | 0         | 0.11        | 23.86     |
| 1          | 12760000       | 13640000     | 880000  | 71                | 0         | 0.13        | 29.3      |
| 1          | 103550000      | 104090000    | 540000  | 43                | 0         | 0.48        | 11.47     |
| 1          | 142210000      | 142710000    | 500000  | 39                | 0         | 0.14        | 16.14     |
| 1          | 142750000      | 143220000    | 470000  | 30                | 0         | 0.12        | 12.77     |
| 1          | 144470000      | 144870000    | 400000  | 35                | 0         | 0.2         | 13.66     |
| 1          | 145880000      | 146160000    | 280000  | 29                | 0         | 0.05        | 13.17     |
| 1          | 146310000      | 147180000    | 870000  | 70                | 0         | 0.37        | 22.56     |
| 1          | 147530000      | 148100000    | 570000  | 52                | 0         | 0.6         | 11.84     |
| 2          | 86920000       | 88060000     | 1140000 | 115               | 0         | 0.21        | 43.96     |
| 2          | 91200000       | 91620000     | 420000  | 43                | 0         | 0.49        | 10.92     |
| 2          | 97050000       | 97610000     | 560000  | 55                | 0         | 0.48        | 14.3      |
| 2          | 109820000      | 110170000    | 350000  | 36                | 0         | 0.02        | 16.7      |
| 2          | 110510000      | 111100000    | 590000  | 44                | 0         | 0.04        | 20.05     |
| 2          | 111730000      | 112080000    | 350000  | 36                | 0         | 0.3         | 12.36     |
| 2          | 130870000      | 131180000    | 310000  | 32                | 0         | 0.11        | 13.62     |
| 4          | 68910000       | 69620000     | 710000  | 61                | 0         | 0.22        | 23.08     |
| 5          | 12840000       | 13240000     | 400000  | 41                | 0         | 0.07        | 18.21     |
| 5          | 68860000       | 71160000     | 2300000 | 231               | 0         | 0.13        | 95.4      |
| 5          | 176980000      | 177410000    | 430000  | 44                | 0         | 0.38        | 13.09     |
| 6          | 115340000      | 115680000    | 340000  | 35                | 0         | 0.03        | 16.14     |
| 6          | 157510000      | 157980000    | 470000  | 42                | 0         | 0.01        | 19.62     |
| 6          | 167750000      | 168030000    | 280000  | 26                | 0         | 0.03        | 11.95     |
| 7          | 62340000       | 62920000     | 580000  | 59                | 0         | 0.57        | 13.56     |
| 7          | 72040000       | 72340000     | 300000  | 31                | 0         | 0.15        | 12.77     |
| 7          | 73790000       | 74980000     | 1190000 | 94                | 0         | 0.18        | 37.11     |
| 7          | 75910000       | 76630000     | 720000  | 73                | 0         | 0.55        | 17.27     |
| 7          | 101910000      | 102220000    | 310000  | 32                | 0         | 0.31        | 10.89     |
| 8          | 6940000        | 8100000      | 1160000 | 106               | 0         | 0.2         | 40.74     |
| 8          | 11910000       | 12430000     | 520000  | 42                | 0         | 0.51        | 10.46     |
| 9          | 38760000       | 47100000     | 8340000 | 733               | 0         | 0.06        | 327.41    |
| 9          | 65230000       | 66550000     | 1320000 | 109               | 0         | 0.11        | 45.86     |
| 9          | 66680000       | 67880000     | 1200000 | 103               | 0         | 0.14        | 42.24     |
| 9          | 67940000       | 70210000     | 2270000 | 186               | 0         | 0.12        | 77.19     |
| 10         | 17830000       | 18250000     | 420000  | 37                | 0         | 0.05        | 16.69     |
| 10         | 45490000       | 46370000     | 880000  | 73                | 0         | 0.07        | 32.21     |
| 10         | 46570000       | 47910000     | 1340000 | 87                | 0         | 0.04        | 38.86     |
| 10         | 48280000       | 49050000     | 770000  | 62                | 0         | 0.03        | 28.42     |
| 10         | 50720000       | 51660000     | 940000  | 83                | 0         | 0.32        | 26.9      |

|    |           |           |          |      |   |      |        |
|----|-----------|-----------|----------|------|---|------|--------|
| 10 | 80920000  | 81660000  | 740000   | 73   | 0 | 0.08 | 31.87  |
| 10 | 88730000  | 89240000  | 510000   | 52   | 0 | 0.35 | 16.14  |
| 11 | 89120000  | 89460000  | 340000   | 35   | 0 | 0.1  | 15     |
| 14 | 18130000  | 18490000  | 360000   | 37   | 0 | 0.28 | 12.96  |
| 14 | 18550000  | 19270000  | 720000   | 73   | 0 | 0.24 | 26.96  |
| 15 | 18280000  | 19660000  | 1380000  | 139  | 0 | 0.48 | 33.64  |
| 15 | 20660000  | 21060000  | 400000   | 41   | 0 | 0.16 | 16.27  |
| 15 | 26210000  | 26890000  | 680000   | 58   | 0 | 0.12 | 24.32  |
| 15 | 28160000  | 28890000  | 730000   | 74   | 0 | 0.25 | 26.57  |
| 15 | 30230000  | 30710000  | 480000   | 49   | 0 | 0.1  | 20.87  |
| 15 | 80370000  | 81000000  | 630000   | 57   | 0 | 0.01 | 26.87  |
| 16 | 14690000  | 15390000  | 700000   | 71   | 0 | 0.44 | 19.71  |
| 16 | 16200000  | 16760000  | 560000   | 57   | 0 | 0.22 | 21.41  |
| 16 | 18080000  | 18690000  | 610000   | 62   | 0 | 0.18 | 24.43  |
| 16 | 31870000  | 32390000  | 520000   | 53   | 0 | 0.43 | 14.88  |
| 16 | 32570000  | 33260000  | 690000   | 70   | 0 | 0.2  | 27.14  |
| 17 | 18230000  | 18680000  | 450000   | 46   | 0 | 0.28 | 15.73  |
| 17 | 31510000  | 31880000  | 370000   | 27   | 0 | 0.02 | 12.5   |
| 17 | 33300000  | 33720000  | 420000   | 32   | 0 | 0.2  | 12.18  |
| 17 | 41650000  | 42130000  | 480000   | 49   | 0 | 0.12 | 20.37  |
| 21 | 13290000  | 14320000  | 1030000  | 104  | 0 | 0.57 | 22.63  |
| 22 | 14450000  | 15070000  | 620000   | 63   | 0 | 0.11 | 26.7   |
| 22 | 18690000  | 19050000  | 360000   | 31   | 0 | 0.09 | 13.37  |
| 22 | 19790000  | 20230000  | 440000   | 45   | 0 | 0.12 | 18.78  |
| X  | 3700000   | 3950000   | 250000   | 26   | 0 | 0    | 12.28  |
| X  | 52120000  | 52580000  | 460000   | 41   | 0 | 0.04 | 18.76  |
| X  | 71890000  | 72110000  | 220000   | 23   | 0 | 0.09 | 10.02  |
| X  | 76150000  | 76450000  | 300000   | 31   | 0 | 0.1  | 13.33  |
| X  | 76610000  | 77330000  | 720000   | 73   | 0 | 0.14 | 30.29  |
| X  | 88340000  | 90160000  | 1820000  | 183  | 0 | 0.45 | 50.32  |
| X  | 90630000  | 92250000  | 1620000  | 163  | 0 | 0.46 | 44.29  |
| X  | 101330000 | 101620000 | 290000   | 30   | 0 | 0.14 | 12.38  |
| 2  | 131650000 | 132700000 | 1050000  | 106  | 1 | 0.93 | 13.67  |
| 2  | 165130000 | 172640000 | 7510000  | 752  | 1 | 1.37 | 15.29  |
| 2  | 179470000 | 204120000 | 24650000 | 2466 | 1 | 1.31 | 85.45  |
| 2  | 208790000 | 215880000 | 7090000  | 710  | 1 | 1.29 | 29.55  |
| 4  | 70000     | 37050000  | 36980000 | 3653 | 1 | 1.03 | 306.58 |
| 4  | 42380000  | 48770000  | 6390000  | 640  | 1 | 1.27 | 27.91  |
| 5  | 49460000  | 53540000  | 4080000  | 409  | 1 | 1.25 | 19.3   |
| 5  | 61540000  | 65520000  | 3980000  | 399  | 1 | 1.3  | 14.92  |
| 5  | 74030000  | 110950000 | 36920000 | 3684 | 1 | 1.31 | 127.59 |

|    |           |           |          |      |   |       |         |
|----|-----------|-----------|----------|------|---|-------|---------|
| 5  | 113180000 | 131310000 | 18130000 | 1814 | 1 | 1.37  | 39.12   |
| 5  | 138130000 | 138970000 | 840000   | 84   | 1 | 0.65  | 12.98   |
| 5  | 160420000 | 166880000 | 6460000  | 647  | 1 | 1.3   | 24.55   |
| 6  | 57800000  | 58870000  | 1070000  | 102  | 1 | 1.08  | 10.26   |
| 9  | 27870000  | 32290000  | 4420000  | 443  | 1 | 1.18  | 28.97   |
| 9  | 70230000  | 85930000  | 15700000 | 1571 | 1 | 0.88  | 178.63  |
| 9  | 101710000 | 107620000 | 5910000  | 592  | 1 | 1.29  | 23.13   |
| 10 | 51680000  | 61000000  | 9320000  | 933  | 1 | 1.25  | 45.36   |
| 10 | 64350000  | 70140000  | 5790000  | 580  | 1 | 1.28  | 23.47   |
| 11 | 48370000  | 51410000  | 3040000  | 284  | 1 | 1.27  | 14.44   |
| 12 | 7150000   | 11460000  | 4310000  | 432  | 1 | 1.17  | 26.9    |
| 12 | 15060000  | 34740000  | 19680000 | 1969 | 1 | 1.37  | 41.23   |
| 12 | 36160000  | 45740000  | 9580000  | 959  | 1 | 1.36  | 22.83   |
| 12 | 57300000  | 63190000  | 5890000  | 590  | 1 | 1.29  | 23.33   |
| 12 | 68390000  | 90770000  | 22380000 | 2213 | 1 | 1.3   | 86.94   |
| 13 | 34270000  | 39230000  | 4960000  | 497  | 1 | 1.37  | 11.03   |
| 13 | 52960000  | 72660000  | 19700000 | 1971 | 1 | 1.19  | 123.34  |
| 15 | 21140000  | 22830000  | 1690000  | 170  | 1 | 1.19  | 10.26   |
| 15 | 31950000  | 35910000  | 3960000  | 397  | 1 | 1.31  | 13.7    |
| 15 | 40820000  | 45360000  | 4540000  | 455  | 1 | 1.34  | 11.53   |
| 15 | 51570000  | 55340000  | 3770000  | 378  | 1 | 1.31  | 13.27   |
| 16 | 28950000  | 29720000  | 770000   | 78   | 1 | 0.66  | 14.67   |
| 17 | 15360000  | 16740000  | 1380000  | 139  | 1 | 1.07  | 11.99   |
| 17 | 18700000  | 20780000  | 2080000  | 209  | 1 | 1.09  | 17.17   |
| 17 | 47680000  | 50580000  | 2900000  | 291  | 1 | 1.29  | 11.4    |
| 17 | 54110000  | 58780000  | 4670000  | 468  | 1 | 1.27  | 18.96   |
| 18 | 14110000  | 15400000  | 1290000  | 130  | 1 | 0.78  | 20.85   |
| 18 | 60030000  | 69460000  | 9430000  | 944  | 1 | 1.25  | 46.52   |
| 19 | 19650000  | 24420000  | 4770000  | 478  | 1 | 1.32  | 13.15   |
| 1  | 35670000  | 43240000  | 7570000  | 758  | 3 | 3.68  | 184.64  |
| 1  | 93520000  | 95910000  | 2390000  | 240  | 3 | 4.23  | 83.26   |
| 1  | 115940000 | 118050000 | 2110000  | 212  | 3 | 3.51  | 44.27   |
| 1  | 119540000 | 120330000 | 790000   | 80   | 3 | 3.1   | 10.48   |
| 1  | 143640000 | 143820000 | 180000   | 19   | 3 | 10.72 | 32.09   |
| 1  | 144100000 | 144450000 | 350000   | 36   | 3 | 5.25  | 19.65   |
| 1  | 144950000 | 145860000 | 910000   | 92   | 3 | 4.98  | 45      |
| 1  | 147200000 | 147510000 | 310000   | 26   | 3 | 4.8   | 11.89   |
| 1  | 148120000 | 159780000 | 11660000 | 1167 | 3 | 5.34  | 658.26  |
| 1  | 159920000 | 194970000 | 35050000 | 3506 | 3 | 4.74  | 1542.58 |
| 1  | 195100000 | 197900000 | 2800000  | 281  | 3 | 4.33  | 99.55   |
| 1  | 198030000 | 204180000 | 6150000  | 616  | 3 | 5.74  | 396.76  |

|   |           |           |          |      |   |       |         |
|---|-----------|-----------|----------|------|---|-------|---------|
| 1 | 204660000 | 222140000 | 17480000 | 1743 | 3 | 3.99  | 520.98  |
| 1 | 222300000 | 241100000 | 18800000 | 1875 | 3 | 3.96  | 549.97  |
| 1 | 241450000 | 246650000 | 5200000  | 521  | 3 | 3.71  | 126.45  |
| 2 | 0         | 18620000  | 18620000 | 1839 | 3 | 3.52  | 384.49  |
| 2 | 191900000 | 65150000  | 45960000 | 4594 | 3 | 3.24  | 699.64  |
| 2 | 91130000  | 91180000  | 50000    | 6    | 3 | 16.13 | 17.25   |
| 2 | 91640000  | 91680000  | 40000    | 5    | 3 | 12.96 | 12.09   |
| 2 | 132720000 | 133130000 | 410000   | 42   | 3 | 3.61  | 11.41   |
| 4 | 52380000  | 58060000  | 5680000  | 569  | 3 | 2.67  | 24.26   |
| 4 | 75870000  | 79840000  | 3970000  | 398  | 3 | 2.73  | 21.02   |
| 4 | 82330000  | 85830000  | 3500000  | 351  | 3 | 2.62  | 11.18   |
| 4 | 104620000 | 119550000 | 14930000 | 1494 | 3 | 3.48  | 285.1   |
| 4 | 119820000 | 120300000 | 480000   | 49   | 3 | 3.77  | 12.25   |
| 4 | 133140000 | 135310000 | 2170000  | 218  | 3 | 3.85  | 55.91   |
| 4 | 135910000 | 156890000 | 20980000 | 2099 | 3 | 6.28  | 1546.73 |
| 4 | 188420000 | 190910000 | 2490000  | 250  | 3 | 3.82  | 67.61   |
| 5 | 910000    | 12000000  | 11090000 | 1110 | 3 | 2.94  | 109.15  |
| 5 | 13260000  | 17560000  | 4300000  | 431  | 3 | 2.84  | 34.93   |
| 5 | 31080000  | 34090000  | 3010000  | 302  | 3 | 2.77  | 19.54   |
| 5 | 34450000  | 36830000  | 2380000  | 239  | 3 | 2.77  | 14.89   |
| 5 | 37750000  | 43660000  | 5910000  | 592  | 3 | 2.59  | 14.07   |
| 6 | 100000    | 9080000   | 8980000  | 899  | 3 | 3.55  | 195.82  |
| 6 | 9370000   | 26770000  | 17400000 | 1741 | 3 | 3.25  | 269.43  |
| 6 | 27090000  | 32050000  | 4960000  | 497  | 3 | 3.3   | 82.74   |
| 6 | 32750000  | 44880000  | 12130000 | 1214 | 3 | 3.04  | 146.5   |
| 6 | 45450000  | 48010000  | 2560000  | 257  | 3 | 2.88  | 21.27   |
| 6 | 50780000  | 54070000  | 3290000  | 330  | 3 | 2.75  | 19.37   |
| 6 | 56280000  | 57780000  | 1500000  | 151  | 3 | 3.03  | 18.14   |
| 6 | 88450000  | 92060000  | 3610000  | 362  | 3 | 2.69  | 16.79   |
| 6 | 105640000 | 112860000 | 7220000  | 723  | 3 | 2.72  | 37.65   |
| 6 | 129850000 | 140010000 | 10160000 | 1017 | 3 | 2.63  | 32.38   |
| 7 | 140000    | 320000    | 180000   | 19   | 3 | 5.51  | 11.36   |
| 7 | 640000    | 5910000   | 5270000  | 528  | 3 | 4.65  | 228.1   |
| 7 | 6000000   | 6740000   | 740000   | 75   | 3 | 4.51  | 30.44   |
| 7 | 6900000   | 35050000  | 28150000 | 2816 | 3 | 4.05  | 861.65  |
| 7 | 35250000  | 56760000  | 21510000 | 2142 | 3 | 3.88  | 593.25  |
| 7 | 62940000  | 64110000  | 1170000  | 118  | 3 | 2.95  | 11.14   |
| 7 | 64840000  | 66080000  | 1240000  | 125  | 3 | 2.98  | 12.92   |
| 7 | 66440000  | 71610000  | 5170000  | 518  | 3 | 3.38  | 97.01   |
| 7 | 72360000  | 73770000  | 1410000  | 142  | 3 | 3.39  | 26.85   |
| 7 | 97690000  | 101890000 | 4200000  | 421  | 3 | 2.76  | 28.01   |

|    |           |           |          |      |   |       |        |
|----|-----------|-----------|----------|------|---|-------|--------|
| 7  | 104050000 | 108300000 | 4250000  | 426  | 3 | 2.7   | 20.88  |
| 7  | 126360000 | 127880000 | 1520000  | 153  | 3 | 2.98  | 16.21  |
| 7  | 128100000 | 142920000 | 14820000 | 1479 | 3 | 2.8   | 103.78 |
| 7  | 147200000 | 149210000 | 2010000  | 202  | 3 | 2.85  | 16.65  |
| 7  | 149640000 | 153020000 | 3380000  | 339  | 3 | 2.84  | 26.52  |
| 7  | 153500000 | 158610000 | 5110000  | 493  | 3 | 2.95  | 50.34  |
| 8  | 139620000 | 145350000 | 5730000  | 563  | 3 | 2.58  | 18.27  |
| 9  | 200000    | 8880000   | 8680000  | 869  | 3 | 2.67  | 36.97  |
| 9  | 13350000  | 15370000  | 2020000  | 203  | 3 | 2.73  | 10.38  |
| 9  | 16000000  | 20580000  | 4580000  | 459  | 3 | 2.64  | 16.29  |
| 9  | 139020000 | 140130000 | 1110000  | 112  | 3 | 3.44  | 21.78  |
| 10 | 70000     | 17810000  | 17740000 | 1769 | 3 | 4.04  | 548.78 |
| 10 | 18270000  | 38600000  | 20330000 | 2034 | 3 | 3.71  | 495.58 |
| 10 | 41690000  | 41860000  | 170000   | 18   | 3 | 19.57 | 66.92  |
| 11 | 68610000  | 69390000  | 780000   | 78   | 3 | 4.17  | 26.72  |
| 13 | 93560000  | 102880000 | 9320000  | 933  | 3 | 2.74  | 53.31  |
| 14 | 93240000  | 100440000 | 7200000  | 721  | 3 | 2.51  | 13.94  |
| 16 | 16780000  | 16890000  | 110000   | 12   | 3 | 27.78 | 58.98  |
| 16 | 52490000  | 57340000  | 4850000  | 486  | 3 | 3.06  | 60.77  |
| 16 | 63290000  | 68520000  | 5230000  | 524  | 3 | 2.9   | 49.13  |
| 16 | 68850000  | 74300000  | 5450000  | 546  | 3 | 3.13  | 75.95  |
| 16 | 75590000  | 86670000  | 11080000 | 1109 | 3 | 3.09  | 146.69 |
| 16 | 86880000  | 88670000  | 1790000  | 177  | 3 | 2.93  | 17.2   |
| 19 | 5850000   | 6110000   | 260000   | 27   | 3 | 4.5   | 10.99  |
| 19 | 16520000  | 17790000  | 1270000  | 128  | 3 | 3.26  | 21.2   |
| 20 | 20000     | 25680000  | 25660000 | 2567 | 3 | 2.86  | 209.94 |
| 20 | 29280000  | 62380000  | 33100000 | 3293 | 3 | 3.05  | 403.24 |
| 21 | 9730000   | 10200000  | 470000   | 48   | 3 | 4.13  | 20.93  |
| 21 | 26250000  | 27010000  | 760000   | 77   | 3 | 3.43  | 16.47  |
| X  | 5790000   | 20560000  | 14770000 | 1478 | 3 | 2.77  | 91.73  |
| X  | 21580000  | 25190000  | 3610000  | 362  | 3 | 2.63  | 11.75  |
| X  | 37340000  | 47490000  | 10150000 | 1016 | 3 | 2.68  | 44.52  |
| X  | 67770000  | 69640000  | 1870000  | 188  | 3 | 2.83  | 14.31  |
| X  | 128490000 | 134060000 | 5570000  | 558  | 3 | 2.65  | 20.74  |
| X  | 134810000 | 139890000 | 5080000  | 509  | 3 | 2.58  | 11.46  |
| X  | 148870000 | 150910000 | 2040000  | 205  | 3 | 2.85  | 16.53  |



**Supplementary Table 7.** Summary of regions with significant copy number alterations in xenograft.

| Chromosome | Start position | End position | Size    | Number of markers | HMM state | Copy Number | LLR score |
|------------|----------------|--------------|---------|-------------------|-----------|-------------|-----------|
| 1          | 0              | 790000       | 790000  | 62                | 0         | 0.17        | 19.27     |
| 1          | 12770000       | 13640000     | 870000  | 70                | 0         | 0.12        | 22.97     |
| 1          | 142210000      | 142700000    | 490000  | 38                | 0         | 0.11        | 12.66     |
| 1          | 144470000      | 144870000    | 400000  | 35                | 0         | 0.23        | 10.12     |
| 1          | 145880000      | 146160000    | 280000  | 29                | 0         | 0.05        | 10.29     |
| 1          | 146310000      | 147180000    | 870000  | 70                | 0         | 0.41        | 15.4      |
| 2          | 86920000       | 88060000     | 1140000 | 115               | 0         | 0.24        | 32.76     |
| 2          | 109830000      | 110170000    | 340000  | 35                | 0         | 0.02        | 12.8      |
| 2          | 110520000      | 111100000    | 580000  | 43                | 0         | 0.04        | 15.36     |
| 2          | 130870000      | 131180000    | 310000  | 32                | 0         | 0.12        | 10.56     |
| 4          | 68910000       | 69620000     | 710000  | 61                | 0         | 0.21        | 18.09     |
| 5          | 12840000       | 13240000     | 400000  | 41                | 0         | 0.07        | 14.2      |
| 5          | 68880000       | 70770000     | 1890000 | 190               | 0         | 0.04        | 68.13     |
| 5          | 138140000      | 138660000    | 520000  | 53                | 0         | 0.03        | 19.2      |
| 6          | 115340000      | 115680000    | 340000  | 35                | 0         | 0.03        | 12.73     |
| 6          | 157660000      | 157980000    | 320000  | 33                | 0         | 0.01        | 12.16     |
| 7          | 73790000       | 74980000     | 1190000 | 94                | 0         | 0.24        | 26.79     |
| 8          | 6940000        | 8100000      | 1160000 | 106               | 0         | 0.21        | 31.39     |
| 9          | 38760000       | 47100000     | 8340000 | 733               | 0         | 0.06        | 257.27    |
| 9          | 65230000       | 66550000     | 1320000 | 109               | 0         | 0.1         | 36.51     |
| 9          | 66680000       | 67880000     | 1200000 | 103               | 0         | 0.15        | 32.66     |
| 9          | 67940000       | 70210000     | 2270000 | 186               | 0         | 0.13        | 60.47     |
| 10         | 17830000       | 18250000     | 420000  | 37                | 0         | 0.05        | 13.08     |
| 10         | 45510000       | 46370000     | 860000  | 71                | 0         | 0.06        | 24.85     |
| 10         | 46570000       | 47910000     | 1340000 | 87                | 0         | 0.01        | 32.04     |
| 10         | 48280000       | 49050000     | 770000  | 62                | 0         | 0.03        | 22.52     |
| 10         | 80920000       | 81660000     | 740000  | 73                | 0         | 0.08        | 25.22     |
| 14         | 18090000       | 19270000     | 1180000 | 119               | 0         | 0.42        | 25.87     |
| 15         | 18280000       | 19660000     | 1380000 | 139               | 0         | 0.44        | 29.04     |
| 15         | 26230000       | 26890000     | 660000  | 56                | 0         | 0.11        | 18.7      |
| 15         | 28160000       | 28850000     | 690000  | 70                | 0         | 0.21        | 20.56     |
| 15         | 80380000       | 81000000     | 620000  | 56                | 0         | 0.01        | 20.81     |
| 16         | 16210000       | 16750000     | 540000  | 55                | 0         | 0.24        | 15.7      |
| 16         | 18080000       | 18690000     | 610000  | 62                | 0         | 0.22        | 18.04     |
| 16         | 32570000       | 33260000     | 690000  | 70                | 0         | 0.22        | 20.3      |
| 17         | 18230000       | 18680000     | 450000  | 46                | 0         | 0.31        | 11.81     |
| 17         | 41650000       | 42130000     | 480000  | 49                | 0         | 0.15        | 15.48     |
| 22         | 14450000       | 15070000     | 620000  | 63                | 0         | 0.11        | 20.88     |
| 22         | 18690000       | 19050000     | 360000  | 31                | 0         | 0.11        | 10.35     |

|    |           |           |          |      |   |      |        |
|----|-----------|-----------|----------|------|---|------|--------|
| 22 | 19790000  | 20230000  | 440000   | 45   | 0 | 0.16 | 14.09  |
| X  | 52120000  | 52580000  | 460000   | 41   | 0 | 0.04 | 14.7   |
| X  | 76150000  | 76450000  | 300000   | 31   | 0 | 0.1  | 10.45  |
| X  | 76610000  | 77330000  | 720000   | 73   | 0 | 0.16 | 22.93  |
| X  | 88350000  | 90160000  | 1810000  | 182  | 0 | 0.39 | 41.25  |
| X  | 91440000  | 92250000  | 810000   | 82   | 0 | 0.32 | 20.84  |
| 1  | 48350000  | 51380000  | 3030000  | 304  | 1 | 1.3  | 11.13  |
| 1  | 55830000  | 70880000  | 15050000 | 1506 | 1 | 1.36 | 40.03  |
| 1  | 102350000 | 106680000 | 4330000  | 422  | 1 | 1.35 | 11.59  |
| 2  | 89060000  | 89950000  | 890000   | 74   | 1 | 0.63 | 12.01  |
| 2  | 97040000  | 97620000  | 580000   | 57   | 1 | 0.52 | 10.48  |
| 2  | 131660000 | 132700000 | 1040000  | 105  | 1 | 0.94 | 10.89  |
| 2  | 165130000 | 216400000 | 51270000 | 5128 | 1 | 1.24 | 244.72 |
| 2  | 220730000 | 231130000 | 10400000 | 1041 | 1 | 1.36 | 28.07  |
| 3  | 50000     | 4300000   | 4250000  | 426  | 1 | 1.36 | 11.08  |
| 4  | 70000     | 37200000  | 37130000 | 3668 | 1 | 0.89 | 418.91 |
| 4  | 42100000  | 48770000  | 6670000  | 668  | 1 | 1.1  | 49.37  |
| 4  | 177890000 | 179800000 | 1910000  | 192  | 1 | 1.21 | 10.31  |
| 5  | 49460000  | 68860000  | 19400000 | 1941 | 1 | 1.28 | 80.15  |
| 5  | 70790000  | 131310000 | 60520000 | 6044 | 1 | 1.2  | 337.1  |
| 5  | 142610000 | 148300000 | 5690000  | 570  | 1 | 1.24 | 27.35  |
| 5  | 151260000 | 153420000 | 2160000  | 217  | 1 | 1.23 | 10.99  |
| 5  | 154500000 | 159160000 | 4660000  | 465  | 1 | 1.38 | 10.82  |
| 5  | 159930000 | 167260000 | 7330000  | 734  | 1 | 1.13 | 50.9   |
| 6  | 144260000 | 148520000 | 4260000  | 427  | 1 | 1.26 | 19.13  |
| 6  | 151990000 | 157580000 | 5590000  | 560  | 1 | 1.34 | 16.93  |
| 7  | 75910000  | 76640000  | 730000   | 74   | 1 | 0.55 | 13.15  |
| 9  | 27530000  | 32300000  | 4770000  | 478  | 1 | 1.1  | 35.83  |
| 9  | 70230000  | 87820000  | 17590000 | 1760 | 1 | 0.75 | 245.63 |
| 9  | 101220000 | 108820000 | 7600000  | 761  | 1 | 1.19 | 43.9   |
| 9  | 116890000 | 121730000 | 4840000  | 485  | 1 | 1.27 | 21.08  |
| 10 | 51140000  | 69180000  | 18040000 | 1805 | 1 | 1.12 | 128.72 |
| 10 | 82470000  | 87650000  | 5180000  | 519  | 1 | 1.23 | 26.43  |
| 10 | 88730000  | 96970000  | 8240000  | 825  | 1 | 1.28 | 33.39  |
| 10 | 106600000 | 111580000 | 4980000  | 499  | 1 | 1.16 | 31.85  |
| 11 | 48220000  | 51410000  | 3190000  | 299  | 1 | 1.22 | 15.52  |
| 11 | 88140000  | 90780000  | 2640000  | 265  | 1 | 1.11 | 19.42  |
| 12 | 7240000   | 11520000  | 4280000  | 429  | 1 | 1.12 | 30.19  |
| 12 | 13430000  | 34230000  | 20800000 | 2081 | 1 | 1.24 | 100.12 |
| 12 | 36160000  | 46210000  | 10050000 | 1006 | 1 | 1.18 | 59.57  |
| 12 | 56630000  | 102520000 | 45890000 | 4564 | 1 | 1.2  | 253.15 |

|    |           |           |          |      |   |       |         |
|----|-----------|-----------|----------|------|---|-------|---------|
| 13 | 17930000  | 19050000  | 1120000  | 113  | 1 | 0.87  | 13.3    |
| 13 | 30710000  | 43590000  | 12880000 | 1289 | 1 | 1.31  | 45.51   |
| 13 | 45420000  | 72670000  | 27250000 | 2726 | 1 | 1.14  | 183.08  |
| 15 | 19790000  | 26210000  | 6420000  | 608  | 1 | 1.18  | 36.16   |
| 15 | 29680000  | 37500000  | 7820000  | 783  | 1 | 1.23  | 38.77   |
| 15 | 43890000  | 48250000  | 4360000  | 437  | 1 | 1.25  | 20.24   |
| 15 | 50410000  | 55340000  | 4930000  | 494  | 1 | 1.26  | 21.93   |
| 15 | 91850000  | 96340000  | 4490000  | 450  | 1 | 1.3   | 17.07   |
| 16 | 14700000  | 15390000  | 690000   | 70   | 1 | 0.6   | 11.82   |
| 16 | 31850000  | 32410000  | 560000   | 57   | 1 | 0.53  | 10.35   |
| 17 | 11490000  | 15730000  | 4240000  | 425  | 1 | 1.37  | 10.07   |
| 17 | 46880000  | 51930000  | 5050000  | 506  | 1 | 1.2   | 28.21   |
| 17 | 63430000  | 67440000  | 4010000  | 392  | 1 | 1.26  | 17.84   |
| 18 | 930000    | 8320000   | 7390000  | 740  | 1 | 1.36  | 18.77   |
| 18 | 13950000  | 15400000  | 1450000  | 146  | 1 | 0.9   | 16.48   |
| 18 | 46780000  | 52820000  | 6040000  | 599  | 1 | 1.22  | 30.81   |
| 18 | 55760000  | 69640000  | 13880000 | 1389 | 1 | 1.17  | 85.62   |
| 21 | 13290000  | 14320000  | 1030000  | 104  | 1 | 0.55  | 18.46   |
| X  | 90180000  | 91420000  | 1240000  | 125  | 1 | 0.78  | 16.87   |
| 1  | 35670000  | 43460000  | 7790000  | 780  | 3 | 4.47  | 287.12  |
| 1  | 93520000  | 95910000  | 2390000  | 240  | 3 | 4.39  | 84.52   |
| 1  | 109520000 | 110970000 | 1450000  | 146  | 3 | 3.1   | 16.39   |
| 1  | 115940000 | 118020000 | 2080000  | 209  | 3 | 3.76  | 49.36   |
| 1  | 143640000 | 143820000 | 180000   | 19   | 3 | 11.76 | 32.88   |
| 1  | 144100000 | 144450000 | 350000   | 36   | 3 | 7.14  | 31.18   |
| 1  | 144950000 | 145860000 | 910000   | 92   | 3 | 5.44  | 50.56   |
| 1  | 147200000 | 147510000 | 310000   | 26   | 3 | 5.13  | 12.79   |
| 1  | 148090000 | 159780000 | 11690000 | 1170 | 3 | 6.92  | 966.68  |
| 1  | 159920000 | 197900000 | 37980000 | 3799 | 3 | 4.99  | 1768.85 |
| 1  | 198030000 | 204180000 | 6150000  | 616  | 3 | 7.79  | 608.51  |
| 1  | 204660000 | 222140000 | 17480000 | 1743 | 3 | 4.27  | 574.91  |
| 1  | 222300000 | 241160000 | 18860000 | 1881 | 3 | 4.64  | 751.5   |
| 1  | 241450000 | 246650000 | 5200000  | 521  | 3 | 4.38  | 183.1   |
| 2  | 0         | 13180000  | 13180000 | 1301 | 3 | 3.98  | 358.88  |
| 2  | 14570000  | 18620000  | 4050000  | 400  | 3 | 3.2   | 52.34   |
| 2  | 19210000  | 34570000  | 15360000 | 1534 | 3 | 3.78  | 365.71  |
| 2  | 36200000  | 40540000  | 4340000  | 435  | 3 | 3.24  | 59.99   |
| 2  | 41530000  | 56590000  | 15060000 | 1507 | 3 | 3.34  | 236.46  |
| 2  | 57730000  | 65740000  | 8010000  | 802  | 3 | 3.22  | 108.54  |
| 2  | 84890000  | 86410000  | 1520000  | 153  | 3 | 3.03  | 15.04   |
| 2  | 90980000  | 91180000  | 200000   | 21   | 3 | 8.71  | 24.38   |

|   |           |           |          |      |   |       |         |
|---|-----------|-----------|----------|------|---|-------|---------|
| 2 | 91640000  | 91680000  | 40000    | 5    | 3 | 14.72 | 11.41   |
| 2 | 96110000  | 97020000  | 910000   | 92   | 3 | 3.25  | 12.97   |
| 2 | 120670000 | 122710000 | 2040000  | 205  | 3 | 3.12  | 23.57   |
| 2 | 127130000 | 129290000 | 2160000  | 217  | 3 | 2.84  | 13.86   |
| 2 | 132720000 | 132820000 | 100000   | 11   | 3 | 10.24 | 15.9    |
| 3 | 12430000  | 15130000  | 2700000  | 271  | 3 | 3.22  | 36.3    |
| 3 | 46480000  | 50700000  | 4220000  | 423  | 3 | 3.22  | 57.1    |
| 3 | 51340000  | 53890000  | 2550000  | 256  | 3 | 3.17  | 31.85   |
| 3 | 72010000  | 74230000  | 2220000  | 223  | 3 | 2.75  | 10.44   |
| 3 | 127200000 | 130870000 | 3670000  | 368  | 3 | 3.13  | 43.21   |
| 3 | 184180000 | 188220000 | 4040000  | 405  | 3 | 2.76  | 19.57   |
| 3 | 194900000 | 199260000 | 4360000  | 430  | 3 | 2.82  | 25.47   |
| 4 | 52380000  | 58070000  | 5690000  | 570  | 3 | 2.95  | 47.86   |
| 4 | 76610000  | 80100000  | 3490000  | 350  | 3 | 2.98  | 31.31   |
| 4 | 82440000  | 86260000  | 3820000  | 383  | 3 | 2.83  | 23.92   |
| 4 | 87940000  | 90470000  | 2530000  | 254  | 3 | 2.88  | 18.2    |
| 4 | 103370000 | 119550000 | 16180000 | 1619 | 3 | 3.33  | 251.41  |
| 4 | 119820000 | 120370000 | 550000   | 56   | 3 | 3.59  | 11.4    |
| 4 | 128860000 | 130010000 | 1150000  | 116  | 3 | 3.04  | 11.6    |
| 4 | 133150000 | 135310000 | 2160000  | 217  | 3 | 4.04  | 62.44   |
| 4 | 135910000 | 155220000 | 19310000 | 1932 | 3 | 6.93  | 1597.92 |
| 4 | 184470000 | 187320000 | 2850000  | 286  | 3 | 2.7   | 10.8    |
| 4 | 188420000 | 190910000 | 2490000  | 250  | 3 | 4.54  | 95.26   |
| 5 | 80000     | 11630000  | 11550000 | 1156 | 3 | 3.31  | 174.21  |
| 5 | 13260000  | 17560000  | 4300000  | 431  | 3 | 3.01  | 40.77   |
| 5 | 31110000  | 34090000  | 2980000  | 299  | 3 | 3.04  | 30.07   |
| 5 | 34460000  | 38960000  | 4500000  | 451  | 3 | 2.75  | 21.45   |
| 6 | 100000    | 9080000   | 8980000  | 899  | 3 | 3.96  | 245.16  |
| 6 | 9370000   | 26770000  | 17400000 | 1741 | 3 | 3.41  | 294.98  |
| 6 | 27090000  | 32550000  | 5460000  | 547  | 3 | 4.04  | 157.45  |
| 6 | 32750000  | 44890000  | 12140000 | 1215 | 3 | 3.9   | 318.87  |
| 6 | 45450000  | 47920000  | 2470000  | 248  | 3 | 2.83  | 15.49   |
| 6 | 51940000  | 53980000  | 2040000  | 205  | 3 | 3.04  | 20.67   |
| 6 | 56280000  | 57750000  | 1470000  | 148  | 3 | 3.16  | 18.24   |
| 6 | 87820000  | 91260000  | 3440000  | 345  | 3 | 2.78  | 17.78   |
| 6 | 105640000 | 112800000 | 7160000  | 717  | 3 | 2.92  | 55.78   |
| 6 | 136540000 | 140010000 | 3470000  | 348  | 3 | 2.78  | 18.23   |
| 7 | 140000    | 320000    | 180000   | 19   | 3 | 7.94  | 19.3    |
| 7 | 640000    | 6740000   | 6100000  | 611  | 3 | 6.96  | 508.95  |
| 7 | 6900000   | 35050000  | 28150000 | 2816 | 3 | 4.1   | 840.42  |
| 7 | 35250000  | 56760000  | 21510000 | 2142 | 3 | 4.11  | 644.07  |

|    |           |           |          |      |   |      |        |
|----|-----------|-----------|----------|------|---|------|--------|
| 7  | 57210000  | 57560000  | 350000   | 36   | 3 | 4.29 | 12.02  |
| 7  | 64840000  | 71620000  | 6780000  | 679  | 3 | 3.39 | 113    |
| 7  | 72360000  | 73770000  | 1410000  | 142  | 3 | 4.87 | 62.92  |
| 7  | 75000000  | 75890000  | 890000   | 90   | 3 | 3.59 | 18.26  |
| 7  | 97480000  | 101890000 | 4410000  | 442  | 3 | 4.04 | 127.53 |
| 7  | 104180000 | 108090000 | 3910000  | 392  | 3 | 2.97 | 34.28  |
| 7  | 126960000 | 135400000 | 8440000  | 845  | 3 | 2.93 | 67.37  |
| 7  | 136920000 | 142920000 | 6000000  | 597  | 3 | 3.18 | 75.71  |
| 7  | 147200000 | 149210000 | 2010000  | 202  | 3 | 3.54 | 39.09  |
| 7  | 149640000 | 153020000 | 3380000  | 339  | 3 | 3.53 | 65.04  |
| 7  | 153500000 | 158610000 | 5110000  | 493  | 3 | 3.8  | 119.71 |
| 8  | 390000    | 2260000   | 1870000  | 188  | 3 | 2.98 | 16.88  |
| 8  | 8120000   | 11880000  | 3760000  | 377  | 3 | 2.67 | 11.81  |
| 8  | 20010000  | 23480000  | 3470000  | 345  | 3 | 2.95 | 28.86  |
| 8  | 27140000  | 28710000  | 1570000  | 158  | 3 | 3.05 | 16.35  |
| 8  | 40800000  | 43210000  | 2410000  | 242  | 3 | 2.77 | 12.25  |
| 8  | 133940000 | 134930000 | 990000   | 100  | 3 | 3.1  | 11.28  |
| 8  | 139650000 | 145350000 | 5700000  | 560  | 3 | 3.6  | 115.51 |
| 9  | 200000    | 7780000   | 7580000  | 759  | 3 | 2.84 | 48.75  |
| 9  | 12990000  | 19670000  | 6680000  | 669  | 3 | 2.74 | 30.2   |
| 9  | 138340000 | 140130000 | 1790000  | 180  | 3 | 4.9  | 80.77  |
| 10 | 70000     | 17810000  | 17740000 | 1769 | 3 | 4.76 | 747.95 |
| 10 | 18270000  | 38600000  | 20330000 | 2034 | 3 | 4.21 | 648.38 |
| 10 | 41690000  | 43390000  | 1700000  | 165  | 3 | 8.27 | 177.95 |
| 11 | 190000    | 3210000   | 3020000  | 301  | 3 | 3.64 | 64.38  |
| 11 | 43850000  | 48200000  | 4350000  | 436  | 3 | 2.99 | 40.12  |
| 11 | 60220000  | 62550000  | 2330000  | 234  | 3 | 3.41 | 39.67  |
| 11 | 63020000  | 67220000  | 4200000  | 421  | 3 | 3.55 | 82.72  |
| 11 | 67530000  | 69390000  | 1860000  | 186  | 3 | 3.35 | 29.49  |
| 11 | 69500000  | 70970000  | 1470000  | 148  | 3 | 3.51 | 27.98  |
| 11 | 71310000  | 73420000  | 2110000  | 212  | 3 | 2.9  | 15.75  |
| 11 | 74520000  | 76600000  | 2080000  | 209  | 3 | 2.97 | 18.48  |
| 11 | 115410000 | 120360000 | 4950000  | 496  | 3 | 3.01 | 47.28  |
| 11 | 124430000 | 126370000 | 1940000  | 195  | 3 | 2.88 | 13.87  |
| 13 | 93750000  | 102700000 | 8950000  | 896  | 3 | 2.92 | 71.11  |
| 14 | 21920000  | 23200000  | 1280000  | 129  | 3 | 2.99 | 11.71  |
| 14 | 68010000  | 69720000  | 1710000  | 172  | 3 | 3.01 | 16.44  |
| 14 | 71950000  | 77780000  | 5830000  | 584  | 3 | 2.91 | 44.3   |
| 14 | 88500000  | 96290000  | 7790000  | 780  | 3 | 2.82 | 46.95  |
| 14 | 98330000  | 105080000 | 6750000  | 676  | 3 | 3.39 | 112.03 |
| 16 | 0         | 5910000   | 5910000  | 592  | 3 | 3.67 | 129.26 |

|    |           |           |          |      |   |      |        |
|----|-----------|-----------|----------|------|---|------|--------|
| 16 | 8450000   | 14680000  | 6230000  | 621  | 3 | 2.87 | 43.08  |
| 16 | 15410000  | 16190000  | 780000   | 79   | 3 | 3.29 | 11.64  |
| 16 | 22540000  | 25210000  | 2670000  | 268  | 3 | 2.87 | 18.37  |
| 16 | 26850000  | 28240000  | 1390000  | 140  | 3 | 3.32 | 21.42  |
| 16 | 30260000  | 31460000  | 1200000  | 121  | 3 | 3.45 | 21.51  |
| 16 | 33780000  | 33930000  | 150000   | 16   | 3 | 6.64 | 12.37  |
| 16 | 47920000  | 49590000  | 1670000  | 168  | 3 | 2.99 | 15.42  |
| 16 | 54790000  | 57340000  | 2550000  | 256  | 3 | 3.07 | 27.34  |
| 16 | 64590000  | 68530000  | 3940000  | 395  | 3 | 3.02 | 38.42  |
| 16 | 68850000  | 70720000  | 1870000  | 188  | 3 | 4.05 | 54.3   |
| 16 | 79480000  | 80530000  | 1050000  | 106  | 3 | 3.15 | 12.95  |
| 16 | 82260000  | 88670000  | 6410000  | 639  | 3 | 3.49 | 118    |
| 17 | 43110000  | 43410000  | 300000   | 31   | 3 | 4.52 | 11.72  |
| 18 | 41320000  | 44830000  | 3510000  | 352  | 3 | 2.77 | 17.93  |
| 19 | 220000    | 19640000  | 19420000 | 1940 | 3 | 3.06 | 201.94 |
| 20 | 20000     | 6230000   | 6210000  | 622  | 3 | 3.64 | 131.92 |
| 20 | 8590000   | 14010000  | 5420000  | 543  | 3 | 2.65 | 15.5   |
| 20 | 15320000  | 25680000  | 10360000 | 1037 | 3 | 3.21 | 136.68 |
| 20 | 29280000  | 52770000  | 23490000 | 2347 | 3 | 3.76 | 552.37 |
| 20 | 53960000  | 62380000  | 8420000  | 828  | 3 | 4.32 | 281.56 |
| 21 | 9730000   | 10200000  | 470000   | 48   | 3 | 4.26 | 15.75  |
| 21 | 26250000  | 27020000  | 770000   | 78   | 3 | 3.41 | 13.21  |
| 21 | 31390000  | 35160000  | 3770000  | 378  | 3 | 2.66 | 11.49  |
| 21 | 36260000  | 40300000  | 4040000  | 405  | 3 | 2.63 | 10.06  |
| X  | 110000    | 3680000   | 3570000  | 321  | 3 | 3.14 | 38.45  |
| X  | 6530000   | 14070000  | 7540000  | 755  | 3 | 2.82 | 45.32  |
| X  | 15120000  | 20410000  | 5290000  | 530  | 3 | 2.99 | 48.65  |
| X  | 21580000  | 25210000  | 3630000  | 364  | 3 | 2.84 | 23.22  |
| X  | 37850000  | 41930000  | 4080000  | 409  | 3 | 3.25 | 57.55  |
| X  | 43180000  | 48030000  | 4850000  | 486  | 3 | 2.82 | 28.94  |
| X  | 48180000  | 49050000  | 870000   | 88   | 3 | 4.02 | 24.99  |
| X  | 53030000  | 54600000  | 1570000  | 158  | 3 | 3.27 | 22.72  |
| X  | 67150000  | 70810000  | 3660000  | 367  | 3 | 3.02 | 35.72  |
| X  | 70950000  | 71870000  | 920000   | 93   | 3 | 3.09 | 10.24  |
| X  | 128450000 | 134060000 | 5610000  | 562  | 3 | 2.77 | 28.18  |
| X  | 134810000 | 136510000 | 1700000  | 171  | 3 | 2.86 | 11.62  |
| X  | 149000000 | 150910000 | 1910000  | 192  | 3 | 3    | 17.8   |
| X  | 151710000 | 153060000 | 1350000  | 136  | 3 | 3.91 | 35.88  |

**Supplementary Table 8. Genes found in focal regions ( $\leq 2$  Mbp) with copy number variations in primary tumor.**

| Chromosome | Start (bp) | End (bp)  | Size (bp) | Number of markers | HMM status | Copy number | LLR score | Gene                                                                                         |
|------------|------------|-----------|-----------|-------------------|------------|-------------|-----------|----------------------------------------------------------------------------------------------|
| 1          | 0          | 790000    | 790000    | 62                | 0          | 0.21        | 40.36     |                                                                                              |
| 1          | 1250000    | 1660000   | 410000    | 42                | 0          | 0.63        | 14.96     | VWA1,CDC2L1,SSU72,MMP23B,CCNL2,CDC2L2,SLC35E2,MGC10334,DVL1,MRPL20                           |
| 1          | 12760000   | 13650000  | 890000    | 72                | 0          | 0.16        | 47.57     | PRAMEF9,PRAMEF4,PRAMEF6,HNRPCL1                                                              |
| 1          | 83370000   | 83720000  | 350000    | 36                | 0          | 0.47        | 17.58     |                                                                                              |
| 1          | 103570000  | 104090000 | 520000    | 41                | 0          | 0.48        | 20.4      |                                                                                              |
| 1          | 108560000  | 108830000 | 270000    | 28                | 0          | 0.48        | 13.6      | CLCC1                                                                                        |
| 1          | 115710000  | 115920000 | 210000    | 22                | 0          | 0.25        | 13.62     |                                                                                              |
| 1          | 115940000  | 117680000 | 1740000   | 175               | 3          | 3.37        | 31.72     | VANGL1,TTF2,NHLH2,CD2,IGSF3,IGSF2,CASQ2,VTNCN1,ATPIA1                                        |
| 1          | 120340000  | 120730000 | 390000    | 34                | 0          | 0.36        | 19.3      | NOTCH2                                                                                       |
| 1          | 141600000  | 142710000 | 1110000   | 82                | 0          | 0.35        | 44.7      |                                                                                              |
| 1          | 142730000  | 143220000 | 490000    | 32                | 0          | 0.16        | 21.88     |                                                                                              |
| 1          | 143270000  | 143620000 | 350000    | 19                | 0          | 0.27        | 11.71     | PDE4DIP                                                                                      |
| 1          | 143640000  | 143820000 | 180000    | 19                | 3          | 9.78        | 33.48     | PDE4DIP,SEC22B                                                                               |
| 1          | 144100000  | 144450000 | 350000    | 36                | 3          | 4.5         | 14.87     | ANKRD34,ANKRD35,CD160,RBM8A,ITGA10,HFE2                                                      |
| 1          | 144470000  | 144870000 | 400000    | 35                | 0          | 0.16        | 23.88     |                                                                                              |
| 1          | 144950000  | 145860000 | 910000    | 92                | 3          | 4.39        | 34.59     | CHD1L,PRKAB2,FMOS,ACP6,GJA5,BCL9,GJA8                                                        |
| 1          | 145880000  | 146160000 | 280000    | 29                | 0          | 0.04        | 21.59     | GPR89B                                                                                       |
| 1          | 146310000  | 147220000 | 910000    | 74                | 0          | 0.39        | 41.89     |                                                                                              |
| 1          | 147520000  | 148100000 | 580000    | 53                | 0          | 0.51        | 26.71     | HIST2H2AA4,HIST2H4A,HIST2H4B,HIST2H3C,HIST2H2AA3,HIST2H3A                                    |
| 1          | 204660000  | 205750000 | 1090000   | 110               | 3          | 3.97        | 33.89     | DYRK3,IKBKE,C1orf116,CD55,C4BPB,IL24,LGTN,PKFB2,C4BPA,CR2,IL10,RASSF5,IL19,MAPKAPK2,IL20,CR1 |
| 1          | 220770000  | 221780000 | 1010000   | 102               | 3          | 3.66        | 23.85     | C1orf80,C1orf58,DISP1,TAF1A,TLR5,USD4                                                        |
| 1          | 241120000  | 241430000 | 310000    | 32                | 0          | 0.85        | 10        | CEP170                                                                                       |
| 2          | 86920000   | 88070000  | 1150000   | 116               | 0          | 0.2         | 74.87     | PLGLB2,CD8B,C2orf59,PLGLB1                                                                   |
| 2          | 89060000   | 89370000  | 310000    | 32                | 0          | 0.44        | 15.96     |                                                                                              |
| 2          | 89590000   | 89950000  | 360000    | 37                | 0          | 0.57        | 15.89     |                                                                                              |
| 2          | 91130000   | 91180000  | 50000     | 6                 | 3          | 14.35       | 19.09     |                                                                                              |
| 2          | 91200000   | 91620000  | 420000    | 43                | 0          | 0.45        | 20.67     |                                                                                              |
| 2          | 91640000   | 91680000  | 40000     | 5                 | 3          | 14.31       | 18.48     |                                                                                              |
| 2          | 95440000   | 96080000  | 640000    | 65                | 0          | 0.84        | 17.19     | FAHD2A                                                                                       |
| 2          | 97040000   | 97610000  | 570000    | 56                | 0          | 0.47        | 26.85     |                                                                                              |
| 2          | 109820000  | 110170000 | 350000    | 36                | 0          | 0.02        | 27.05     | RGPDS                                                                                        |
| 2          | 110520000  | 111100000 | 580000    | 43                | 0          | 0.04        | 31.9      |                                                                                              |
| 2          | 111730000  | 112080000 | 350000    | 36                | 0          | 0.27        | 21.73     |                                                                                              |
| 2          | 113860000  | 114130000 | 270000    | 28                | 0          | 0.36        | 15.41     | FOXD4L1,RABL2A                                                                               |
| 2          | 130870000  | 131180000 | 310000    | 32                | 0          | 0.09        | 22.63     | CFC1                                                                                         |

|   |           |           |         |     |   |       |       |                                                                                                      |
|---|-----------|-----------|---------|-----|---|-------|-------|------------------------------------------------------------------------------------------------------|
| 2 | 132240000 | 132680000 | 440000  | 45  | 0 | 0.58  | 18.25 | C2or27                                                                                               |
| 2 | 132700000 | 133200000 | 500000  | 51  | 3 | 3.77  | 20.17 | LYPD1,GPR39                                                                                          |
| 2 | 242170000 | 242350000 | 180000  | 19  | 0 | 0.04  | 14.1  | ATG4B,ING5                                                                                           |
| 3 | 46320000  | 46460000  | 140000  | 15  | 0 | 0.09  | 10.61 | LTF,CCR5,CCRL2                                                                                       |
| 3 | 68010000  | 68140000  | 130000  | 14  | 0 | 0.05  | 10.28 | FAM19A1                                                                                              |
| 3 | 76320000  | 76480000  | 160000  | 17  | 0 | 0.08  | 12.25 |                                                                                                      |
| 3 | 121760000 | 121900000 | 140000  | 15  | 0 | 0.09  | 10.69 | NDUFB4,RABL3                                                                                         |
| 4 | 8960000   | 9360000   | 400000  | 41  | 0 | 0.51  | 12.64 | DEFB131                                                                                              |
| 4 | 48790000  | 48860000  | 70000   | 8   | 3 | 9.45  | 16.49 |                                                                                                      |
| 4 | 68910000  | 69620000  | 710000  | 61  | 0 | 0.21  | 39.44 | UGT2B15,TMPRSS11E                                                                                    |
| 4 | 132800000 | 133120000 | 320000  | 33  | 0 | 0.78  | 10.75 |                                                                                                      |
| 5 | 12840000  | 13250000  | 410000  | 42  | 0 | 0.11  | 29.72 |                                                                                                      |
| 5 | 20730000  | 20970000  | 240000  | 25  | 0 | 0.62  | 10.61 |                                                                                                      |
| 5 | 34110000  | 34430000  | 320000  | 33  | 0 | 0.54  | 15.35 |                                                                                                      |
| 5 | 37750000  | 38960000  | 1210000 | 122 | 3 | 2.89  | 10.22 | EGFLAM,OSMR,GNF,LIFR                                                                                 |
| 5 | 175260000 | 175480000 | 220000  | 23  | 0 | 0.29  | 13.15 | THOC3                                                                                                |
| 5 | 176980000 | 177410000 | 430000  | 44  | 0 | 0.41  | 22.2  |                                                                                                      |
| 5 | 180190000 | 180330000 | 140000  | 15  | 0 | 0.09  | 10.64 |                                                                                                      |
| 6 | 9100000   | 9350000   | 250000  | 20  | 0 | 0.03  | 14.91 |                                                                                                      |
| 6 | 26790000  | 27070000  | 280000  | 29  | 0 | 0.6   | 12.27 |                                                                                                      |
| 6 | 45510000  | 47500000  | 1990000 | 200 | 3 | 2.67  | 12.47 | RUNX2,CLIC5,CYP39A1,MEP1A,ENPP4,TNFRSF21,GPRI10,ENPP5,GPR116                                         |
| 6 | 57310000  | 57780000  | 470000  | 48  | 3 | 3.9   | 21.25 |                                                                                                      |
| 6 | 57800000  | 58820000  | 1020000 | 97  | 0 | 0.89  | 22.68 | GUSBL2                                                                                               |
| 6 | 58840000  | 58880000  | 40000   | 5   | 3 | 48.64 | 86.94 |                                                                                                      |
| 6 | 115340000 | 115680000 | 340000  | 35  | 0 | 0.03  | 26.21 |                                                                                                      |
| 6 | 157510000 | 157980000 | 470000  | 42  | 0 | 0.01  | 31.71 | ARID1B                                                                                               |
| 6 | 167690000 | 168030000 | 340000  | 32  | 0 | 0.21  | 19.66 | MLLT4,TTL12                                                                                          |
| 7 | 6000000   | 6740000   | 740000  | 75  | 3 | 3.49  | 19.56 | PSCD3,RAC1,MGC12966,JTV1,PMS2,ZNF12,EIF2AK1,KDEL2                                                    |
| 7 | 33060000  | 35040000  | 1980000 | 199 | 3 | 3.08  | 28.2  | RP9,NTSC3,NPSR1,BBS9,BMPEP                                                                           |
| 7 | 44060000  | 45720000  | 1660000 | 167 | 3 | 3.44  | 41.54 | DBNL,RAMP3,GCK,PURB,YKT6,MYO1G,MYL7,NPC1L1,AEBP1,OGDH,DX56,CCM2,ADCY1,ZMIZ2,TBRG4,H2AFV,PGAM2,CAMK2B |
| 7 | 56780000  | 57190000  | 410000  | 36  | 0 | 0.37  | 19.45 |                                                                                                      |
| 7 | 61110000  | 61240000  | 130000  | 14  | 0 | 0.07  | 10.1  |                                                                                                      |
| 7 | 61260000  | 62310000  | 1050000 | 94  | 3 | 2.87  | 10.97 |                                                                                                      |
| 7 | 62330000  | 62730000  | 400000  | 41  | 0 | 0.34  | 23.09 |                                                                                                      |
| 7 | 64600000  | 64880000  | 280000  | 29  | 0 | 0.65  | 10.96 |                                                                                                      |
| 7 | 72050000  | 72350000  | 300000  | 31  | 0 | 0.12  | 21.3  | NSUN5C,LOC442578,POM121                                                                              |
| 7 | 72370000  | 73770000  | 1400000 | 141 | 3 | 2.72  | 14.46 | GTF2I,STX1A,REC2,GTF2IRD1,FZD9,EIF4H,WBSCR27,WBSCR22,WBSCR18,MLX1PL,LIMK1,CLDN3,BCL7B,CL             |



|    |           |           |         |     |   |      |       |                                                                                                                                                                                                                                         |
|----|-----------|-----------|---------|-----|---|------|-------|-----------------------------------------------------------------------------------------------------------------------------------------------------------------------------------------------------------------------------------------|
|    |           |           |         |     |   |      |       | DN4,ABHD11,WBS<br>CR28,CLIP2,TBL2,<br>BAZ1B,LAT2                                                                                                                                                                                        |
| 7  | 73790000  | 74980000  | 1190000 | 94  | 0 | 0.14 | 63.32 | GTF21,DKFZF434A<br>0131,PMS2L5,PMS<br>2L3,NSUNSB,GTF2<br>IRD2,GTF2IRD2B,<br>WBSCR16                                                                                                                                                     |
| 7  | 75910000  | 76640000  | 730000  | 74  | 0 | 0.45 | 35.83 | UPK3B,POMZP3,K<br>IAA1505,DTX2                                                                                                                                                                                                          |
| 7  | 97700000  | 99640000  | 1940000 | 195 | 3 | 2.49 | 12.22 | GAL3ST4,ZNF789,<br>COPS6,C7orf58,ZK<br>SCAN1,PTCD1,AP<br>4M1,LOC389541,C<br>PSF4,LOC255374,T<br>AF6,AZGP1,STAG<br>3,ATP5J2,ARPC1B,<br>MCM7,ZSCAN21,<br>ARPC1A,BR13,SM<br>URF1,PDAP1                                                     |
| 7  | 101910000 | 102220000 | 310000  | 32  | 0 | 0.24 | 19.42 | RASA4,POLR2J2                                                                                                                                                                                                                           |
| 7  | 126490000 | 127880000 | 1390000 | 140 | 3 | 2.67 | 11.97 | ARF5,NAG8,IMPJ<br>H1,PAX4,GCC1,GR<br>M8,LRRC4,LEP,SN<br>D1,ZNF800                                                                                                                                                                       |
| 7  | 142940000 | 143190000 | 250000  | 26  | 0 | 0.24 | 16.19 |                                                                                                                                                                                                                                         |
| 7  | 143510000 | 143690000 | 180000  | 19  | 0 | 0.12 | 13.07 | ARHGFE5                                                                                                                                                                                                                                 |
| 7  | 147310000 | 149210000 | 1900000 | 191 | 3 | 2.51 | 10.24 | EZH2,CUL1,ZNF21<br>2,ZNF398,PDIA4,C<br>NTNAP2                                                                                                                                                                                           |
| 7  | 149230000 | 149620000 | 390000  | 40  | 0 | 0.65 | 14.46 |                                                                                                                                                                                                                                         |
| 7  | 149640000 | 151340000 | 1700000 | 171 | 3 | 2.63 | 14.07 | TMEM176B,CDK5,<br>ABC88,NUB1,GIM<br>AP7,GIMAP1,GIM<br>AP2,RARRS2,AT<br>G9B,TMEM176A,S<br>MARCD3,GIMAP6,<br>GIMAP4,CRYGN,A<br>BCF2,GIMAP8,FAS<br>TK,GIMAP5,KCNH<br>2,RHEB,NOS3,SLC<br>4A2,C7orf29,ACCN<br>3,ASB10,REPIN1,P<br>RKAG2,ABP1 |
| 8  | 0         | 140000    | 140000  | 15  | 0 | 0.09 | 10.68 |                                                                                                                                                                                                                                         |
| 8  | 6930000   | 8100000   | 1170000 | 107 | 0 | 0.18 | 69.46 | DEFB103A,DEFB4,<br>SPAG11B                                                                                                                                                                                                              |
| 8  | 11900000  | 12430000  | 530000  | 43  | 0 | 0.45 | 20.87 | DUB3                                                                                                                                                                                                                                    |
| 9  | 0         | 180000    | 180000  | 19  | 0 | 0.24 | 11.96 | CBWD1                                                                                                                                                                                                                                   |
| 9  | 65230000  | 66550000  | 1320000 | 109 | 0 | 0.13 | 74.25 |                                                                                                                                                                                                                                         |
| 9  | 66680000  | 67880000  | 1200000 | 103 | 0 | 0.17 | 68.3  | FAM27E3                                                                                                                                                                                                                                 |
| 9  | 139030000 | 140130000 | 1100000 | 111 | 3 | 3.1  | 12.88 | FUT7,MRPL41,C9o<br>r167,ARRDC1,GRI<br>N1,ABC2,ANAPC<br>2,MGC14327,DPP7,<br>ENTPD2,COBRA1,<br>MAN1B1,LRRC26,<br>PNPLA7,NEFL,SL<br>C34A3,TUBB2C,Z<br>MYND19,ENTPD8,<br>EHMT1                                                              |
| 10 | 17830000  | 18250000  | 420000  | 37  | 0 | 0.05 | 27.4  | MRC1,MRC1L1                                                                                                                                                                                                                             |
| 10 | 41690000  | 41850000  | 160000  | 17  | 3 | 23.6 | 94.88 |                                                                                                                                                                                                                                         |
| 10 | 45490000  | 46370000  | 880000  | 73  | 0 | 0.07 | 52.3  | FAM21C                                                                                                                                                                                                                                  |
| 10 | 46580000  | 47910000  | 1330000 | 86  | 0 | 0.08 | 59.98 | ANXA8                                                                                                                                                                                                                                   |
| 10 | 48280000  | 49050000  | 770000  | 62  | 0 | 0.04 | 45.88 | FRMPD2,PTPN20B                                                                                                                                                                                                                          |
| 10 | 50720000  | 51660000  | 940000  | 83  | 0 | 0.36 | 45.09 | MSMB,LOC387680                                                                                                                                                                                                                          |
| 10 | 80920000  | 81660000  | 740000  | 73  | 0 | 0.09 | 52.02 | SFTPA1B                                                                                                                                                                                                                                 |
| 10 | 88730000  | 89240000  | 510000  | 52  | 0 | 0.4  | 26.98 | FAM35A                                                                                                                                                                                                                                  |
| 11 | 48360000  | 50270000  | 1910000 | 192 | 1 | 1.22 | 21.96 | OR4A47,FOLH1                                                                                                                                                                                                                            |
| 11 | 88160000  | 89000000  | 840000  | 85  | 1 | 1.17 | 11.64 | GRM5,TYR                                                                                                                                                                                                                                |
| 11 | 89020000  | 89460000  | 440000  | 45  | 0 | 0.27 | 26.96 | TRIM49                                                                                                                                                                                                                                  |
| 13 | 17930000  | 18340000  | 410000  | 42  | 0 | 0.39 | 20.82 |                                                                                                                                                                                                                                         |

|    |          |          |         |     |   |       |       |                                                                                                                                                     |
|----|----------|----------|---------|-----|---|-------|-------|-----------------------------------------------------------------------------------------------------------------------------------------------------|
| 13 | 51670000 | 52060000 | 390000  | 40  | 0 | 0.75  | 11.03 | CKAP2,THSD1,VP<br>S36                                                                                                                               |
| 14 | 18130000 | 18490000 | 360000  | 37  | 0 | 0.27  | 22.12 |                                                                                                                                                     |
| 14 | 18550000 | 19250000 | 700000  | 71  | 0 | 0.19  | 46.05 | ACTBL1                                                                                                                                              |
| 15 | 18280000 | 19660000 | 1380000 | 139 | 0 | 0.58  | 53.96 | LOC283755,POTE1<br>5                                                                                                                                |
| 15 | 20660000 | 21180000 | 520000  | 47  | 0 | 0.15  | 31.53 | GOLGA8E                                                                                                                                             |
| 15 | 26110000 | 26890000 | 780000  | 68  | 0 | 0.28  | 40.07 | GOLGA8G,HERC2                                                                                                                                       |
| 15 | 28160000 | 28890000 | 730000  | 74  | 0 | 0.27  | 44.28 | CHRFAM7A                                                                                                                                            |
| 15 | 30230000 | 30700000 | 470000  | 48  | 0 | 0.09  | 33.91 | ARHGAP11A,CHR<br>NA7                                                                                                                                |
| 15 | 80270000 | 81000000 | 730000  | 67  | 0 | 0.19  | 43.6  | RPS17                                                                                                                                               |
| 15 | 82530000 | 82900000 | 370000  | 31  | 0 | 0.56  | 13.04 |                                                                                                                                                     |
| 16 | 14690000 | 15390000 | 700000  | 71  | 0 | 0.4   | 36.41 | RRN3,NOMO1,NPI<br>P                                                                                                                                 |
| 16 | 16200000 | 16750000 | 550000  | 56  | 0 | 0.18  | 36.45 | NOMO3,ABCC6                                                                                                                                         |
| 16 | 18080000 | 18690000 | 610000  | 62  | 0 | 0.16  | 41.05 | NOMO2                                                                                                                                               |
| 16 | 21260000 | 21460000 | 200000  | 21  | 0 | 0.4   | 10.64 |                                                                                                                                                     |
| 16 | 21660000 | 21850000 | 190000  | 20  | 0 | 0.2   | 12.75 |                                                                                                                                                     |
| 16 | 22350000 | 22520000 | 170000  | 18  | 0 | 0.15  | 11.95 |                                                                                                                                                     |
| 16 | 28250000 | 28380000 | 130000  | 14  | 0 | 0.05  | 10.25 | LOC440350                                                                                                                                           |
| 16 | 28530000 | 28720000 | 190000  | 20  | 0 | 0.14  | 13.42 | EIF3S8,SULT1A1                                                                                                                                      |
| 16 | 28950000 | 29720000 | 770000  | 78  | 0 | 0.58  | 31.56 | SPN,QPRT,C16orf5<br>4,KIF22                                                                                                                         |
| 16 | 31850000 | 32390000 | 540000  | 55  | 0 | 0.41  | 27.86 |                                                                                                                                                     |
| 16 | 32570000 | 33260000 | 690000  | 70  | 0 | 0.18  | 46.09 | TP53TG3                                                                                                                                             |
| 16 | 33540000 | 33760000 | 220000  | 23  | 0 | 0.33  | 12.88 |                                                                                                                                                     |
| 16 | 33780000 | 33930000 | 150000  | 16  | 3 | 5.86  | 17.35 |                                                                                                                                                     |
| 16 | 44960000 | 45000000 | 40000   | 5   | 3 | 14.59 | 19.64 |                                                                                                                                                     |
| 16 | 69280000 | 69750000 | 470000  | 48  | 3 | 6.04  | 42.57 | VAC14,HYDIN                                                                                                                                         |
| 17 | 15370000 | 15730000 | 360000  | 37  | 0 | 0.62  | 14.26 | TRIM16,MGC5102<br>5                                                                                                                                 |
| 17 | 16510000 | 16700000 | 190000  | 20  | 0 | 0.36  | 10.71 |                                                                                                                                                     |
| 17 | 18230000 | 18680000 | 450000  | 46  | 0 | 0.3   | 26.56 | FLJ40244,LOC6543<br>46                                                                                                                              |
| 17 | 18870000 | 19070000 | 200000  | 21  | 0 | 0.02  | 15.76 | GRAP                                                                                                                                                |
| 17 | 20160000 | 20750000 | 590000  | 60  | 0 | 0.65  | 22.01 |                                                                                                                                                     |
| 17 | 31510000 | 31880000 | 370000  | 27  | 0 | 0.02  | 20.25 | TBC1D3G                                                                                                                                             |
| 17 | 33290000 | 33720000 | 430000  | 33  | 0 | 0.24  | 20.14 | MRPL45                                                                                                                                              |
| 17 | 36350000 | 36530000 | 180000  | 19  | 0 | 0.04  | 14.03 | KRTAP2-<br>4,KRTAP1-<br>3,KRTAP1-<br>1,KRT39,KRTAP3-<br>1,KRTAP1-<br>5,KRTAP3-<br>2,KRTAP3-3                                                        |
| 17 | 41650000 | 42130000 | 480000  | 49  | 0 | 0.13  | 33.35 | NSF,ARL17P1                                                                                                                                         |
| 18 | 14110000 | 15400000 | 1290000 | 130 | 0 | 0.74  | 41.89 |                                                                                                                                                     |
| 19 | 30000    | 200000   | 170000  | 18  | 0 | 0.11  | 12.68 | FLJ45445                                                                                                                                            |
| 19 | 47900000 | 48590000 | 690000  | 70  | 1 | 1.03  | 11.83 | PSG9,PSG3,PSG2,P<br>SG4,PSG7                                                                                                                        |
| 20 | 20000    | 1490000  | 1470000 | 148 | 3 | 2.76  | 16.1  | FKBP1A,RBCK1,T<br>RIB3,SNPH,C20orf<br>54,TCF15,RSPO4,C<br>SNK2A1,SOX12,PS<br>MF1,ANGPT4,NSF<br>L1C,FAM110A,DE<br>FB127,SDCBP2,DE<br>FB129,DEFB126,T |

|    |           |           |         |     |   |      |       |                                  |
|----|-----------|-----------|---------|-----|---|------|-------|----------------------------------|
|    |           |           |         |     |   |      |       | BC1D20                           |
| 21 | 9730000   | 10200000  | 470000  | 48  | 3 | 4.88 | 42.5  | TPTE                             |
| 21 | 13290000  | 14320000  | 1030000 | 104 | 0 | 0.52 | 44.55 | ANKRD21                          |
| 21 | 26250000  | 27010000  | 760000  | 77  | 3 | 3.21 | 18.31 | APP,CYYR1                        |
| 22 | 14450000  | 15760000  | 1310000 | 116 | 0 | 0.46 | 56.77 | ACTBL1,CESK1                     |
| 22 | 17020000  | 17330000  | 310000  | 32  | 0 | 0.42 | 16.11 | DGCR6,PRODH,U<br>SP18            |
| 22 | 18670000  | 19050000  | 380000  | 33  | 0 | 0.15 | 22.09 | DGCR6L                           |
| 22 | 19790000  | 20240000  | 450000  | 46  | 0 | 0.14 | 30.96 | LOC375133,HIC2                   |
| X  | 3700000   | 3950000   | 250000  | 26  | 0 | 0    | 19.83 |                                  |
| X  | 52120000  | 52580000  | 460000  | 41  | 0 | 0.03 | 30.55 | XAGE1D,XAGE2                     |
| X  | 67770000  | 68710000  | 940000  | 95  | 3 | 2.87 | 12.75 | TMEM28,EFNB1,P<br>JA1            |
| X  | 71880000  | 72110000  | 230000  | 24  | 0 | 0.08 | 17.16 |                                  |
| X  | 76150000  | 76450000  | 300000  | 31  | 0 | 0.1  | 21.91 |                                  |
| X  | 76610000  | 77330000  | 720000  | 73  | 0 | 0.12 | 50.39 | TAF9B,PGAM4,AT<br>P7A,COX7B,ATRX |
| X  | 88340000  | 90160000  | 1820000 | 183 | 0 | 0.41 | 92.26 | TGIF2LX                          |
| X  | 90630000  | 92250000  | 1620000 | 163 | 0 | 0.43 | 80.75 | PCDH11X                          |
| X  | 101330000 | 101620000 | 290000  | 30  | 0 | 0.12 | 20.57 | NXF2                             |

**Supplementary Table 9. Genes found in focal regions ( $\leq 2$  Mbp) with copy number variations in brain metastasis.**

| Chromosome | Start (bp) | End (bp)  | Size (bp) | Number of markers | HMM status | Copy number | LLR score | Gene                                                         |
|------------|------------|-----------|-----------|-------------------|------------|-------------|-----------|--------------------------------------------------------------|
| 1          | 0          | 730000    | 730000    | 56                | 0          | 0.11        | 23.86     |                                                              |
| 1          | 12760000   | 13640000  | 880000    | 71                | 0          | 0.13        | 29.3      | PRAMEF9,PRAMEF4,PRAMEF6,HNR PCL1                             |
| 1          | 103550000  | 104090000 | 540000    | 43                | 0          | 0.48        | 11.47     |                                                              |
| 1          | 119540000  | 120330000 | 790000    | 80                | 3          | 3.1         | 10.48     | HSD3B2,HAO2,NO TCH2,REG4,HMG CS2,ADAM30,HSD 3B1              |
| 1          | 142210000  | 142710000 | 500000    | 39                | 0          | 0.14        | 16.14     |                                                              |
| 1          | 142750000  | 143220000 | 470000    | 30                | 0          | 0.12        | 12.77     |                                                              |
| 1          | 143640000  | 143820000 | 180000    | 19                | 3          | 10.72       | 32.09     | PDE4DIP,SEC22B                                               |
| 1          | 144100000  | 144450000 | 350000    | 36                | 3          | 5.25        | 19.65     | CD160,ANKRD34, ANKRD35,RBM8A ,ITGA10,HFE2                    |
| 1          | 144470000  | 144870000 | 400000    | 35                | 0          | 0.2         | 13.66     |                                                              |
| 1          | 144950000  | 145860000 | 910000    | 92                | 3          | 4.98        | 45        | CHD1L,ACP6,PRK AB2,GJA5,FMO5,B CL9,GJA8                      |
| 1          | 145880000  | 146160000 | 280000    | 29                | 0          | 0.05        | 13.17     | GPR89B                                                       |
| 1          | 146310000  | 147180000 | 870000    | 70                | 0          | 0.37        | 22.56     |                                                              |
| 1          | 147200000  | 147510000 | 310000    | 26                | 3          | 4.8         | 11.89     |                                                              |
| 1          | 147530000  | 148100000 | 570000    | 52                | 0          | 0.6         | 11.84     | HIST2H2AA4,HIST 2H4A,HIST2H4B,H IST2H3C,HIST2H3 A,HIST2H2AA3 |
| 2          | 86920000   | 88060000  | 1140000   | 115               | 0          | 0.21        | 43.96     | PLGLB1,CD8B,PL GLB2,C2orf59                                  |
| 2          | 91130000   | 91180000  | 50000     | 6                 | 3          | 16.13       | 17.25     |                                                              |
| 2          | 91200000   | 91620000  | 420000    | 43                | 0          | 0.49        | 10.92     |                                                              |
| 2          | 91640000   | 91680000  | 40000     | 5                 | 3          | 12.96       | 12.09     |                                                              |
| 2          | 97050000   | 97610000  | 560000    | 55                | 0          | 0.48        | 14.3      |                                                              |
| 2          | 109820000  | 110170000 | 350000    | 36                | 0          | 0.02        | 16.7      | RGPD5                                                        |
| 2          | 110510000  | 111100000 | 590000    | 44                | 0          | 0.04        | 20.05     |                                                              |
| 2          | 111730000  | 112080000 | 350000    | 36                | 0          | 0.3         | 12.36     |                                                              |
| 2          | 130870000  | 131180000 | 310000    | 32                | 0          | 0.11        | 13.62     | CFC1                                                         |
| 2          | 131650000  | 132700000 | 1050000   | 106               | 1          | 0.93        | 13.67     | C2orf27,TUBA3D,P OTE2                                        |
| 2          | 132720000  | 133130000 | 410000    | 42                | 3          | 3.61        | 11.41     | GPR39,LYPD1                                                  |
| 4          | 68910000   | 69620000  | 710000    | 61                | 0          | 0.22        | 23.08     | TMPRSS11E,UGT2 B15                                           |
| 4          | 119820000  | 120300000 | 480000    | 49                | 3          | 3.77        | 12.25     | SEC24D                                                       |
| 5          | 12840000   | 13240000  | 400000    | 41                | 0          | 0.07        | 18.21     |                                                              |
| 5          | 138130000  | 138970000 | 840000    | 84                | 1          | 0.65        | 12.98     | PAIP2,SLC23A1,CT NNA1,MATR3,UB E2D2,SIL1                     |
| 5          | 176980000  | 177410000 | 430000    | 44                | 0          | 0.38        | 13.09     |                                                              |
| 6          | 56280000   | 57780000  | 1500000   | 151               | 3          | 3.03        | 18.14     | RAB23,ZNF451,BA G2                                           |
| 6          | 57800000   | 58870000  | 1070000   | 102               | 1          | 1.08        | 10.26     | GUSB1.2                                                      |
| 6          | 115340000  | 115680000 | 340000    | 35                | 0          | 0.03        | 16.14     |                                                              |
| 6          | 157510000  | 157980000 | 470000    | 42                | 0          | 0.01        | 19.62     | ARID1B                                                       |
| 6          | 167750000  | 168030000 | 280000    | 26                | 0          | 0.03        | 11.95     | MLLT4                                                        |
| 7          | 140000     | 320000    | 180000    | 19                | 3          | 5.51        | 11.36     |                                                              |
| 7          | 6000000    | 6740000   | 740000    | 75                | 3          | 4.51        | 30.44     | ZNF12,PSCD3,RA C1,MGC12966,EIF 2AK1,KDELRL2,IT V1,PMS2       |

|    |           |           |         |     |   |       |       |                                                                                                                                                                                   |
|----|-----------|-----------|---------|-----|---|-------|-------|-----------------------------------------------------------------------------------------------------------------------------------------------------------------------------------|
| 7  | 62340000  | 62920000  | 580000  | 59  | 0 | 0.57  | 13.56 |                                                                                                                                                                                   |
| 7  | 62940000  | 64110000  | 1170000 | 118 | 3 | 2.95  | 11.14 | ZNF588                                                                                                                                                                            |
| 7  | 64840000  | 66080000  | 1240000 | 125 | 3 | 2.98  | 12.92 | ASL,RCP9,C7orH2,<br>LOC285908,RABG<br>EF1,GUSB,VKORC<br>1L1                                                                                                                       |
| 7  | 72040000  | 72340000  | 300000  | 31  | 0 | 0.15  | 12.77 | LOC442578,NSUN<br>5C,POM121                                                                                                                                                       |
| 7  | 72360000  | 73770000  | 1410000 | 142 | 3 | 3.39  | 26.85 | GTF2I,STX1A,RFC<br>2,GTF2IRD1,FZD9,<br>EIF4H,WBSCR27,<br>WBSCR22,MLXIP<br>L,WBSCR18,LMXK<br>L,CLDN3,BCL17B,A<br>BHD11,CLDN4,WB<br>SCR28,NSUN5,CLI<br>P2,TBL2,BAZ1B,L<br>AT2       |
| 7  | 73790000  | 74980000  | 1190000 | 94  | 0 | 0.18  | 37.11 | GTF2I,DKFZP434A<br>0131,PMS2L5,PMS<br>2L3,NSUN5B,GTF2<br>IRD2,GTF2IRD2B,<br>WBSCR16                                                                                               |
| 7  | 75910000  | 76630000  | 720000  | 73  | 0 | 0.55  | 17.27 | UPK3B,POMZP3,K<br>IAA1505,DTX2                                                                                                                                                    |
| 7  | 101910000 | 102220000 | 310000  | 32  | 0 | 0.31  | 10.89 | RASA4,POLR2J2                                                                                                                                                                     |
| 7  | 126360000 | 127880000 | 1520000 | 153 | 3 | 2.98  | 16.21 | ARF5,NAG8,IMP<br>D1,PAX4,GCC1,GR<br>M8,LRRC4,I,EP<br>SN<br>D1,ZNF800                                                                                                              |
| 8  | 6940000   | 8100000   | 1160000 | 106 | 0 | 0.2   | 40.74 | DEFB103A,DEFB4,<br>SPAG11B                                                                                                                                                        |
| 8  | 11910000  | 12430000  | 520000  | 42  | 0 | 0.51  | 10.46 | DUB3                                                                                                                                                                              |
| 9  | 65230000  | 66550000  | 1320000 | 109 | 0 | 0.11  | 45.86 |                                                                                                                                                                                   |
| 9  | 66680000  | 67880000  | 1200000 | 103 | 0 | 0.14  | 42.24 | FAM27E3                                                                                                                                                                           |
| 9  | 139020000 | 140130000 | 1110000 | 112 | 3 | 3.44  | 21.78 | FUT7,MRPL41,C9o<br>rfl67,ARRDC1,GRI<br>N1,ABC A2,ANAPC<br>2,MGC14327,DP<br>P7,<br>ENTPD2,CORRA1,<br>MAN1B1,LRRC26,<br>PNPLA7,NELF,SL<br>C34A3,TUBB2C,Z<br>MYND19,ENTPD8,<br>EHMT1 |
| 10 | 17830000  | 18250000  | 420000  | 37  | 0 | 0.05  | 16.69 | MRC1,MRC1L1                                                                                                                                                                       |
| 10 | 41690000  | 41860000  | 170000  | 18  | 3 | 19.57 | 66.92 |                                                                                                                                                                                   |
| 10 | 45490000  | 46370000  | 880000  | 73  | 0 | 0.07  | 32.21 | FAM21C                                                                                                                                                                            |
| 10 | 46570000  | 47910000  | 1340000 | 87  | 0 | 0.04  | 38.86 | ANXA8                                                                                                                                                                             |
| 10 | 48280000  | 49050000  | 770000  | 62  | 0 | 0.03  | 28.42 | FRMPD2,PTPN20B                                                                                                                                                                    |
| 10 | 50720000  | 51660000  | 940000  | 83  | 0 | 0.32  | 26.9  | MSMB,LOC387680                                                                                                                                                                    |
| 10 | 80920000  | 81660000  | 740000  | 73  | 0 | 0.08  | 31.87 | SFTPA1B                                                                                                                                                                           |
| 10 | 88730000  | 89240000  | 510000  | 52  | 0 | 0.35  | 16.14 | FAM35A                                                                                                                                                                            |
| 11 | 68610000  | 69390000  | 780000  | 78  | 3 | 4.17  | 26.72 | TPCN2,FGF4,CCN<br>D1,FGF19,MYEOV,<br>FGF3,ORAOV1                                                                                                                                  |
| 11 | 89120000  | 89460000  | 340000  | 35  | 0 | 0.1   | 15    | TRIM49                                                                                                                                                                            |
| 14 | 18130000  | 18490000  | 360000  | 37  | 0 | 0.28  | 12.96 |                                                                                                                                                                                   |
| 14 | 18550000  | 19270000  | 720000  | 73  | 0 | 0.24  | 26.96 | ACTBL1                                                                                                                                                                            |
| 15 | 18280000  | 19660000  | 1380000 | 139 | 0 | 0.48  | 33.64 | LOC283755,POTE1<br>5                                                                                                                                                              |
| 15 | 20660000  | 21060000  | 400000  | 41  | 0 | 0.16  | 16.27 | GOLGA8E                                                                                                                                                                           |
| 15 | 21140000  | 22830000  | 1690000 | 170 | 1 | 1.19  | 10.26 | NDN,MKRN3,C15o<br>r12                                                                                                                                                             |
| 15 | 26210000  | 26890000  | 680000  | 58  | 0 | 0.12  | 24.32 | GOLGA8G,HERC2                                                                                                                                                                     |
| 15 | 28160000  | 28890000  | 730000  | 74  | 0 | 0.25  | 26.57 | CHRFAM7A                                                                                                                                                                          |
| 15 | 30230000  | 30710000  | 480000  | 49  | 0 | 0.1   | 20.87 | ARHGAP11A,CHR<br>NA7                                                                                                                                                              |
| 15 | 80370000  | 81000000  | 630000  | 57  | 0 | 0.01  | 26.87 | RPS17                                                                                                                                                                             |
| 16 | 14690000  | 15390000  | 700000  | 71  | 0 | 0.44  | 19.71 | RRN3,NOMO1,NP<br>P                                                                                                                                                                |

|    |          |          |        |     |   |       |       |                                                                                                                                                                                                                    |
|----|----------|----------|--------|-----|---|-------|-------|--------------------------------------------------------------------------------------------------------------------------------------------------------------------------------------------------------------------|
| 16 | 1620000  | 1676000  | 56000  | 57  | 0 | 0.22  | 21.41 | NOMO3,ABCC6                                                                                                                                                                                                        |
| 16 | 1678000  | 1689000  | 11000  | 12  | 3 | 27.78 | 58.98 |                                                                                                                                                                                                                    |
| 16 | 1808000  | 1869000  | 61000  | 62  | 0 | 0.18  | 24.43 | NOMO2                                                                                                                                                                                                              |
| 16 | 2895000  | 2972000  | 77000  | 78  | 1 | 0.66  | 14.67 | SPN,QPRT,C16orf5<br>4,KIF22                                                                                                                                                                                        |
| 16 | 3187000  | 3239000  | 52000  | 53  | 0 | 0.43  | 14.88 |                                                                                                                                                                                                                    |
| 16 | 3257000  | 3326000  | 69000  | 70  | 0 | 0.2   | 27.14 | TP53TG3                                                                                                                                                                                                            |
| 16 | 8688000  | 8867000  | 179000 | 177 | 3 | 2.93  | 17.2  | DBNDD1,FANCA,<br>CYBA,MGC16385,<br>TUBB3,SPG7,GAL<br>NS,FLJ20186,SPIR<br>E2,CPNE7,PRDM7,<br>MC1R,RPL13,AFG<br>3L1,APRT,CDK10,<br>CBFA2T3,ANKRD<br>11,ZFPM1,MVD,L<br>OC348180,SNAI3,<br>GAS8,CDH15,IL17<br>C,ZNF276 |
| 17 | 1536000  | 1674000  | 138000 | 139 | 1 | 1.07  | 11.99 | P1GL,ZNF287,TRI<br>M16,UBB,TRPV2,<br>NCOR1,ADORA2B<br>,PRR6,TTC19,MGC<br>51025                                                                                                                                     |
| 17 | 1823000  | 1868000  | 45000  | 46  | 0 | 0.28  | 15.73 | FL40244,LOC6543<br>46                                                                                                                                                                                              |
| 17 | 3151000  | 3188000  | 37000  | 27  | 0 | 0.02  | 12.5  | TBC1D3G                                                                                                                                                                                                            |
| 17 | 3330000  | 3372000  | 42000  | 32  | 0 | 0.2   | 12.18 | MRPL45                                                                                                                                                                                                             |
| 17 | 4165000  | 4213000  | 48000  | 49  | 0 | 0.12  | 20.37 | NSF,ARL17P1                                                                                                                                                                                                        |
| 18 | 1411000  | 1540000  | 129000 | 130 | 1 | 0.78  | 20.85 |                                                                                                                                                                                                                    |
| 19 | 585000   | 611000   | 26000  | 27  | 3 | 4.5   | 10.99 | CAPS,RFX2,NDUF<br>A11,RANBP3,ACS<br>BG2                                                                                                                                                                            |
| 19 | 1652000  | 1779000  | 127000 | 128 | 3 | 3.26  | 21.2  | B3GNT3,ABHD8,F<br>AM129C,INSL3,M<br>DS032,CRSP7,USH<br>BP1,NR2F6,PGLS,<br>NY-SAR-<br>48,MAP1S,MYO9B<br>,C19orf62,MRPL34,<br>F2RL3,BST2                                                                             |
| 21 | 973000   | 1020000  | 47000  | 48  | 3 | 4.13  | 20.93 | TPTE                                                                                                                                                                                                               |
| 21 | 1329000  | 1432000  | 103000 | 104 | 0 | 0.57  | 22.63 | ANKRD21                                                                                                                                                                                                            |
| 21 | 2625000  | 2701000  | 76000  | 77  | 3 | 3.43  | 16.47 | APP,CYR1                                                                                                                                                                                                           |
| 22 | 1445000  | 1507000  | 62000  | 63  | 0 | 0.11  | 26.7  | ACTBL1                                                                                                                                                                                                             |
| 22 | 1869000  | 1905000  | 36000  | 31  | 0 | 0.09  | 13.37 |                                                                                                                                                                                                                    |
| 22 | 1979000  | 2023000  | 44000  | 45  | 0 | 0.12  | 18.78 | LOC375133,HIC2                                                                                                                                                                                                     |
| X  | 370000   | 395000   | 25000  | 26  | 0 | 0     | 12.28 |                                                                                                                                                                                                                    |
| X  | 5212000  | 5258000  | 46000  | 41  | 0 | 0.04  | 18.76 | XAGE1D,XAGE2                                                                                                                                                                                                       |
| X  | 6777000  | 6964000  | 187000 | 188 | 3 | 2.83  | 14.51 | DLG3,P2RY4,DGA<br>T2L4,PDZD11,TME<br>M28,ARR3,EDA,IG<br>BP1,KIF4A,EFNB1,<br>PJA1                                                                                                                                   |
| X  | 7189000  | 7211000  | 22000  | 23  | 0 | 0.09  | 10.02 |                                                                                                                                                                                                                    |
| X  | 7615000  | 7645000  | 30000  | 31  | 0 | 0.1   | 13.33 |                                                                                                                                                                                                                    |
| X  | 7661000  | 7733000  | 72000  | 73  | 0 | 0.14  | 30.29 | TAF9B,PGAM4,AT<br>P7A,COX7B,ATRX                                                                                                                                                                                   |
| X  | 8834000  | 9016000  | 182000 | 183 | 0 | 0.45  | 50.32 | TGIF2LX                                                                                                                                                                                                            |
| X  | 9063000  | 9225000  | 162000 | 163 | 0 | 0.46  | 44.29 | PCDH11X                                                                                                                                                                                                            |
| X  | 10133000 | 10162000 | 29000  | 30  | 0 | 0.14  | 12.38 | NXF2                                                                                                                                                                                                               |

**Supplementary Table 10.** Genes found in focal regions ( $\leq 2$  Mbp) with copy number variations in xenograft.

| Chromosome | Start (bp) | End (bp)  | Size (bp) | Number of markers | HMM status | Copy number | LLR score | Gene                                                                                                                                                                                   |
|------------|------------|-----------|-----------|-------------------|------------|-------------|-----------|----------------------------------------------------------------------------------------------------------------------------------------------------------------------------------------|
| 1          | 0          | 790000    | 790000    | 62                | 0          | 0.17        | 19.27     |                                                                                                                                                                                        |
| 1          | 12770000   | 13640000  | 870000    | 70                | 0          | 0.12        | 22.97     | PRAMEF9,PRAMEF4,PRAMEF6,HNR PCL1                                                                                                                                                       |
| 1          | 109520000  | 110970000 | 1450000   | 146               | 3          | 3.1         | 16.39     | EPS8L3,KCNA2,PROK1,KCNC4,GSTM3,PSMA5,AMIG O1,RBM15,GSTM4 ,AMPD2,CELSR2, GSTM5,KIAA1324, HBXIP,FAM40A,A HCYL1,CSF1,GSTM1,GPR61,GNAT2, SORT1,UBL4B,SARS,SLC6A17,ALX3 ,PSRC1,KCNA10,GSTM2 |
| 1          | 142210000  | 142700000 | 490000    | 38                | 0          | 0.11        | 12.66     |                                                                                                                                                                                        |
| 1          | 143640000  | 143820000 | 180000    | 19                | 3          | 11.76       | 32.88     | PDE4DIP,SEC22B                                                                                                                                                                         |
| 1          | 144100000  | 144450000 | 350000    | 36                | 3          | 7.14        | 31.18     | ANKRD34,ANKRD35,CD160,HFE2,RB M8A,ITGA10                                                                                                                                               |
| 1          | 144470000  | 144870000 | 400000    | 35                | 0          | 0.23        | 10.12     |                                                                                                                                                                                        |
| 1          | 144950000  | 145860000 | 910000    | 92                | 3          | 5.44        | 50.56     | CHD1L,PRKAB2,FMO5,ACP6,GIA5,BCL9,GJA8                                                                                                                                                  |
| 1          | 145880000  | 146160000 | 280000    | 29                | 0          | 0.05        | 10.29     | GPR89B                                                                                                                                                                                 |
| 1          | 146310000  | 147180000 | 870000    | 70                | 0          | 0.41        | 15.4      |                                                                                                                                                                                        |
| 1          | 147200000  | 147510000 | 310000    | 26                | 3          | 5.13        | 12.79     |                                                                                                                                                                                        |
| 2          | 84890000   | 86410000  | 1520000   | 153               | 3          | 3.03        | 15.04     | VAMP5,TGOLN2,TMSB10,MRPL35,KCMF1,RNF181,IMMT,PTCD3,POLR1A,MAT2A,GNLY,SFTPB,VAMP8,USP39,CAPG                                                                                            |
| 2          | 86920000   | 88060000  | 1140000   | 115               | 0          | 0.24        | 32.76     | PLGLB2,CD8B,C2orf59,PLGLB1                                                                                                                                                             |
| 2          | 89060000   | 89950000  | 890000    | 74                | 1          | 0.63        | 12.01     |                                                                                                                                                                                        |
| 2          | 90980000   | 91180000  | 200000    | 21                | 3          | 8.71        | 24.38     |                                                                                                                                                                                        |
| 2          | 91640000   | 91680000  | 40000     | 5                 | 3          | 14.72       | 11.41     |                                                                                                                                                                                        |
| 2          | 96110000   | 97020000  | 910000    | 92                | 3          | 3.25        | 12.97     | ANKRD39,CNNM3,CIAO1,ASTL,CNNM4,ARID5A,NCAPH,ANKRD23,ASCC3L1,SEMA4C,DUSP2,KIAA1754L,STAR7                                                                                               |
| 2          | 97040000   | 97620000  | 580000    | 57                | 1          | 0.52        | 10.48     |                                                                                                                                                                                        |
| 2          | 109830000  | 110170000 | 340000    | 35                | 0          | 0.02        | 12.8      | RGPD5                                                                                                                                                                                  |
| 2          | 110520000  | 111100000 | 580000    | 43                | 0          | 0.04        | 15.36     |                                                                                                                                                                                        |
| 2          | 130870000  | 131180000 | 310000    | 32                | 0          | 0.12        | 10.56     | CFC1                                                                                                                                                                                   |
| 2          | 131660000  | 132700000 | 1040000   | 105               | 1          | 0.94        | 10.89     | POTE2,C2orf27,TUBA3D                                                                                                                                                                   |
| 2          | 132720000  | 132820000 | 100000    | 11                | 3          | 10.24       | 15.9      |                                                                                                                                                                                        |
| 4          | 68910000   | 69620000  | 710000    | 61                | 0          | 0.21        | 18.09     | UGT2B15,TMPRSS11E                                                                                                                                                                      |
| 4          | 119820000  | 120370000 | 550000    | 56                | 3          | 3.59        | 11.4      | SEC24D                                                                                                                                                                                 |
| 4          | 128860000  | 130010000 | 1150000   | 116               | 3          | 3.04        | 11.6      | PHF17,PLK4,LARP2                                                                                                                                                                       |
| 4          | 177890000  | 179800000 | 1910000   | 192               | 1          | 1.21        | 10.51     | AGA,VEGFC,NEIL3                                                                                                                                                                        |
| 5          | 12840000   | 13240000  | 400000    | 41                | 0          | 0.07        | 14.2      |                                                                                                                                                                                        |
| 5          | 68880000   | 70770000  | 1890000   | 190               | 0          | 0.04        | 68.13     | SMN1,SMN2,NAIP,OCLN,SERF1A,GT E2H2                                                                                                                                                     |
| 5          | 138140000  | 138660000 | 520000    | 53                | 0          | 0.03        | 19.2      | CTNNA1,SIL1,MA TR3                                                                                                                                                                     |
| 6          | 56280000   | 57750000  | 1470000   | 148               | 3          | 3.16        | 18.24     | RAB23,BAG2,ZNF451                                                                                                                                                                      |

|    |           |           |         |     |   |      |        |                                                                                                                                                                                                                                                                         |
|----|-----------|-----------|---------|-----|---|------|--------|-------------------------------------------------------------------------------------------------------------------------------------------------------------------------------------------------------------------------------------------------------------------------|
| 6  | 115340000 | 115680000 | 340000  | 35  | 0 | 0.03 | 12.73  |                                                                                                                                                                                                                                                                         |
| 6  | 157660000 | 157980000 | 320000  | 33  | 0 | 0.01 | 12.16  |                                                                                                                                                                                                                                                                         |
| 7  | 140000    | 320000    | 180000  | 19  | 3 | 7.94 | 19.3   |                                                                                                                                                                                                                                                                         |
| 7  | 57210000  | 57560000  | 350000  | 36  | 3 | 4.29 | 12.02  |                                                                                                                                                                                                                                                                         |
| 7  | 72360000  | 73770000  | 1410000 | 142 | 3 | 4.87 | 62.92  | GTF2I,STX1A,RFC2,GTF2IRD1,EZD9,EIF4H,WBSCR27,WBSCR22,WBSCR18,MLXIPL,LIMK1,CLDN3,BCL7B,CLDN4,ABHD11,WBSCR28,NSUN5,CLIP2,TBL2,BAZ1B,LA T2                                                                                                                                 |
| 7  | 73790000  | 74980000  | 1190000 | 94  | 0 | 0.24 | 26.79  | GTF2I,DKFZP434A0131,PMS2L5,PMS2L3,NSUN5B,GTF2IRD2,GTF2IRD2B,WBSCR16                                                                                                                                                                                                     |
| 7  | 75000000  | 75890000  | 890000  | 90  | 3 | 3.59 | 18.26  | STYXL1,HIPL,ZP3,CCL24,YWHAGC,CL26,MDH2                                                                                                                                                                                                                                  |
| 7  | 75910000  | 76640000  | 730000  | 74  | 1 | 0.55 | 13.15  | UPK3B,POMZP3,K1AA1505,DTX2                                                                                                                                                                                                                                              |
| 8  | 390000    | 2260000   | 1870000 | 188 | 3 | 2.98 | 16.88  | ARHGEF10,DGLGAP2,FBXO25,MYO M2                                                                                                                                                                                                                                          |
| 8  | 6940000   | 8100000   | 1160000 | 106 | 0 | 0.21 | 31.39  | DEFB103A,DEFB4,SPAG11B                                                                                                                                                                                                                                                  |
| 8  | 27140000  | 28710000  | 1570000 | 158 | 3 | 3.05 | 16.35  | EPHX2,CHRNA2,E,SCO2,PBK,TRIM35,SCARA3,FZD3,PNOC,CLU,ZNF395,FBXO16,PTK2B                                                                                                                                                                                                 |
| 8  | 133940000 | 134930000 | 990000  | 100 | 3 | 3.1  | 11.28  | TGST3GALI,SLA,NDRG1,WISP1                                                                                                                                                                                                                                               |
| 9  | 65230000  | 66550000  | 1320000 | 109 | 0 | 0.1  | 36.51  |                                                                                                                                                                                                                                                                         |
| 9  | 66680000  | 67880000  | 1200000 | 103 | 0 | 0.15 | 32.66  | FAM27E3                                                                                                                                                                                                                                                                 |
| 9  | 138340000 | 140130000 | 1790000 | 180 | 3 | 4.9  | 80.77  | MAMDC4,LCN12,LCN6,TRAF2,C9orf167,GRIN1,ABC A2,MGC14327,DPF7,ENTPD2,AGPAT2,MAN1B1,NELF,K1AA1984,INPP5E,ZMYND19,ENTPD8,C8GHEMT1,FUT7,MRPL41,C9orf86,FBXW5,ARRDC1,C LIC3,SDCCAG3,ANAPC2,SNAPC4,E,GPL7,COBRA1,LRRC26,PNPLA7,C9orf63,CARD9,TMEM141,SLC34A3,TUBB2C,EDF1,PTGDS |
| 10 | 17830000  | 18250000  | 420000  | 37  | 0 | 0.05 | 13.08  | MRC1,MRC1L1                                                                                                                                                                                                                                                             |
| 10 | 41690000  | 43390000  | 1700000 | 165 | 3 | 8.27 | 177.95 | FXVD4,HNRPE,ZNF239,RET                                                                                                                                                                                                                                                  |
| 10 | 45510000  | 46370000  | 860000  | 71  | 0 | 0.06 | 24.85  | FAM21C                                                                                                                                                                                                                                                                  |
| 10 | 46570000  | 47910000  | 1340000 | 87  | 0 | 0.01 | 32.04  | ANXA8                                                                                                                                                                                                                                                                   |
| 10 | 48280000  | 49050000  | 770000  | 62  | 0 | 0.03 | 22.52  | FRMPD2,PTPN20B                                                                                                                                                                                                                                                          |
| 10 | 80920000  | 81660000  | 740000  | 73  | 0 | 0.08 | 25.22  | SFTPA1B                                                                                                                                                                                                                                                                 |
| 11 | 67530000  | 69390000  | 1860000 | 186 | 3 | 3.35 | 29.49  | LRP5,CHKA,MTL5,FGF4,GAL,MRGPRD,MYEOV,CPT1A,FGF3,ORAOV1,IGHMBP2,TCIRG1,TPCN2,SAPS3,MRGPRF,CCND1,FGF19,SUV420H1,MRPL21                                                                                                                                                    |
| 11 | 69500000  | 70970000  | 1470000 | 148 | 3 | 3.51 | 27.98  | KRTAP5-10,KRTAP5-7,NADSYN1,CTTN,PPF1A1,FADD,TMEM16A,SHANK2,DHCR7                                                                                                                                                                                                        |
| 11 | 124430000 | 126370000 | 1940000 | 195 | 3 | 2.88 | 13.87  | CDON,FEZ1,FAM118B,DCPS,CHEK1,PATE,ACRV1,TIRAP                                                                                                                                                                                                                           |
| 13 | 17930000  | 19050000  | 1120000 | 113 | 1 | 0.87 | 13.3   | TUBA3C,TPTE2                                                                                                                                                                                                                                                            |
| 14 | 18090000  | 19270000  | 1180000 | 119 | 0 | 0.42 | 25.87  | ACTBL1                                                                                                                                                                                                                                                                  |



|    |          |          |         |     |   |      |       |                                                                                                                                                                                           |
|----|----------|----------|---------|-----|---|------|-------|-------------------------------------------------------------------------------------------------------------------------------------------------------------------------------------------|
| 14 | 21920000 | 23200000 | 1280000 | 129 | 3 | 2.99 | 11.71 | CMTM5,MMP14,C<br>EBPE,DAD1,MRPL<br>52,BCL2L2,PSMB5<br>,IL25,PRMT5,MYH<br>6,JUB,MYH7,ZFH<br>X2,AP1G2,SLC7A8<br>,EFS,ABHD4,PABP<br>N1,DHRS2,RBM23,<br>LRP10                                 |
| 14 | 68010000 | 69720000 | 1710000 | 172 | 3 | 3.01 | 16.44 | SMOC1,SLC8A3,R<br>AD51L1,SFRS5,ZF<br>P36L1,ACTN1,FLJ<br>39779,C14orf162                                                                                                                   |
| 15 | 18280000 | 19660000 | 1380000 | 139 | 0 | 0.44 | 29.04 | LOC283755,POTE1<br>5                                                                                                                                                                      |
| 15 | 26230000 | 26890000 | 660000  | 56  | 0 | 0.11 | 18.7  | GOLGA8GHERC2                                                                                                                                                                              |
| 15 | 28160000 | 28850000 | 690000  | 70  | 0 | 0.21 | 20.56 | CHRFAM7A                                                                                                                                                                                  |
| 15 | 80380000 | 81000000 | 620000  | 56  | 0 | 0.01 | 20.81 | RPS17                                                                                                                                                                                     |
| 16 | 14700000 | 15390000 | 690000  | 70  | 1 | 0.6  | 11.82 | RRN3,NOMO1,NPI<br>P                                                                                                                                                                       |
| 16 | 15410000 | 16190000 | 780000  | 79  | 3 | 3.29 | 11.64 | ABCC1,KIAA0430,<br>ABCC6,MYH11                                                                                                                                                            |
| 16 | 16210000 | 16750000 | 540000  | 55  | 0 | 0.24 | 15.7  | NOMO3,ABCC6                                                                                                                                                                               |
| 16 | 18080000 | 18690000 | 610000  | 62  | 0 | 0.22 | 18.04 | NOMO2                                                                                                                                                                                     |
| 16 | 26850000 | 28240000 | 1390000 | 140 | 3 | 3.32 | 21.42 | GSGL,NSMCE1.1<br>L21R,GTFC1,IL4<br>R                                                                                                                                                      |
| 16 | 30260000 | 31460000 | 1200000 | 121 | 3 | 3.45 | 21.51 | ERAF,COX6A2,FU<br>S,STX1B,ZNF688,S<br>LC5A2,ITGAM,LO<br>C283932,PRSS36,I<br>TGAX,BCL7C,AR<br>MC5,VKORC1,PO<br>L3S,SEPT1,FBXL1<br>9,SEPHS2,CTF1,R<br>NF40,PYCARD,IT<br>GAD,PRSS8,ITGA<br>L |
| 16 | 31850000 | 32410000 | 560000  | 57  | 1 | 0.53 | 10.35 |                                                                                                                                                                                           |
| 16 | 32570000 | 33260000 | 690000  | 70  | 0 | 0.22 | 20.3  | TP53TG3                                                                                                                                                                                   |
| 16 | 33780000 | 33930000 | 150000  | 16  | 3 | 6.64 | 12.37 |                                                                                                                                                                                           |
| 16 | 47920000 | 49590000 | 1670000 | 168 | 3 | 2.99 | 15.42 | CYLD,NOD2,PAPD<br>5,BRD7,ADCY7,Z<br>NF423                                                                                                                                                 |
| 16 | 68850000 | 70720000 | 1870000 | 188 | 3 | 4.05 | 54.3  | DDX19B,AP1G1,C<br>ALB2,DHX38,TAT,<br>MARVELD3,FUK,<br>PHLPL,DHODH,V<br>AC14,FLJ11171,SE<br>3B3,ZNF19,HPR,S<br>T3GAL2,AARS,HY<br>DIN,HP                                                    |
| 16 | 79480000 | 80530000 | 1050000 | 106 | 3 | 3.15 | 12.95 | GCSH,PKD1L2,AS<br>CIZ,PLCG2,GAN,C<br>ENPN,BCMO1,C16<br>orf46                                                                                                                              |
| 17 | 18230000 | 18680000 | 450000  | 46  | 0 | 0.31 | 11.81 | FLJ40244,LOC6543<br>46                                                                                                                                                                    |
| 17 | 41650000 | 42130000 | 480000  | 49  | 0 | 0.15 | 15.48 | ARL17P1,NSF                                                                                                                                                                               |
| 17 | 43110000 | 43410000 | 300000  | 31  | 3 | 4.52 | 11.72 | OSBP1.7,TBX21,PN<br>PO,SP6,CDKSRAP<br>3,KPNB1,MRPL10                                                                                                                                      |
| 18 | 13950000 | 15400000 | 1450000 | 146 | 1 | 0.9  | 16.48 |                                                                                                                                                                                           |
| 21 | 9730000  | 10200000 | 470000  | 48  | 3 | 4.26 | 15.75 | TPTE                                                                                                                                                                                      |
| 21 | 13290000 | 14320000 | 1030000 | 104 | 1 | 0.55 | 18.46 | ANKRD21                                                                                                                                                                                   |
| 21 | 26250000 | 27020000 | 770000  | 78  | 3 | 3.41 | 13.21 | APP,CYYR1                                                                                                                                                                                 |
| 22 | 14450000 | 15070000 | 620000  | 63  | 0 | 0.11 | 20.88 | ACTB.L1                                                                                                                                                                                   |
| 22 | 18690000 | 19050000 | 360000  | 31  | 0 | 0.11 | 10.35 |                                                                                                                                                                                           |
| 22 | 19790000 | 20230000 | 440000  | 45  | 0 | 0.16 | 14.09 | LOC375133,HIC2                                                                                                                                                                            |
| X  | 48180000 | 49050000 | 870000  | 88  | 3 | 4.02 | 24.99 | WDR45,CACNA1F,<br>GRIPAP1,PPP1R3F,<br>FTSJ1,POBP1,RBM<br>3,GATA1,EBPHDA<br>C6,CCDC22,LMO6,<br>PCSKIN,PORCN,S<br>YPKCND1,WAS,T<br>BC1D25,WDR13,S<br>UV39HI                                 |
| X  | 52120000 | 52580000 | 460000  | 41  | 0 | 0.04 | 14.7  | XAGE1D,XAGE2                                                                                                                                                                              |

|   |           |           |         |     |   |      |       |                                                                                                                                                            |
|---|-----------|-----------|---------|-----|---|------|-------|------------------------------------------------------------------------------------------------------------------------------------------------------------|
| X | 53030000  | 54600000  | 1570000 | 158 | 3 | 3.27 | 22.72 | FGD1,GNL3L,HSD<br>17B10,SMC1A,FA<br>M120C,WNK3,IQS<br>EC2,JARID1C,HU<br>WE1                                                                                |
| X | 70950000  | 71870000  | 920000  | 93  | 3 | 3.09 | 10.24 | HDAC8,RPS4X,PI<br>N4,ERC6GL                                                                                                                                |
| X | 76150000  | 76450000  | 300000  | 31  | 0 | 0.1  | 10.45 |                                                                                                                                                            |
| X | 76610000  | 77330000  | 720000  | 73  | 0 | 0.16 | 22.93 | TAF9B,PGAM4,AT<br>P7A,COX7B,ATRX                                                                                                                           |
| X | 88350000  | 90160000  | 1810000 | 182 | 0 | 0.39 | 41.25 | TGIF2LX                                                                                                                                                    |
| X | 90180000  | 91420000  | 1240000 | 125 | 1 | 0.78 | 16.87 | PCDH11X                                                                                                                                                    |
| X | 91440000  | 92250000  | 810000  | 82  | 0 | 0.32 | 20.84 | PCDH11X                                                                                                                                                    |
| X | 134810000 | 136510000 | 1700000 | 171 | 3 | 2.86 | 11.62 | ARHGFE6,GPR112,<br>ZIC3,CD40L,GBRS<br>3,SLC9A6,SAGE1,<br>RBMX                                                                                              |
| X | 149000000 | 150910000 | 1910000 | 192 | 3 | 3    | 17.8  | MTM1,CD99L2,H<br>MGB3,GPR50,GAB<br>RE,MAGEA4,CNG<br>A2,MTMR1,FATE1,<br>PASD1                                                                               |
| X | 151710000 | 153060000 | 1350000 | 136 | 3 | 3.91 | 35.88 | TMEM187,CETN2,<br>BGNL1,CAM,MEC<br>P2,SSR4,DUSP9L<br>CAP,BCAP31,UCH<br>L5IP,IRAK1,AVPR2<br>JDH3G,MAGEA1,P<br>NMA5,RENBP,AB<br>CD1,ARHGAP4,TR<br>EX2,ATP2B3 |

**Supplementary Table 11.** Cross comparison of copy numbers in primary tumor, metastasis, and xenograft derived from Illumina SNP array, aCGH, and whole genome sequencing. For primary tumor, we obtained data from Illumina SNP array and whole genome sequencing platforms; For metastasis, we obtained data from aCGH and whole genome sequencing platforms; For xenograft, we obtained data from all three platforms.

|                         |               | Illumina SNP array |                 | aCGH            |                 | whole genome sequencing |                 |                 |
|-------------------------|---------------|--------------------|-----------------|-----------------|-----------------|-------------------------|-----------------|-----------------|
|                         |               | Primary Tumor      | Metastasis      | Metastasis      | Xenograft       | Primary Tumor           | Metastasis      | Xenograft       |
| Illumina SNP array      | Primary Tumor | 1                  | 0.5427571<br>45 | 0.2883278<br>93 | 0.3657749<br>14 | 0.498693966             | 0.5281729<br>36 | 0.5807002<br>91 |
|                         | Metastasis    | 0.542757145        | 1               | 0.5707169<br>06 | 0.5602133<br>47 | 0.639529316             | 0.7028072<br>81 | 0.6447669<br>32 |
| aCGH                    | Metastasis    | 0.288327893        | 0.5707169<br>06 | 1               | 0.5245965<br>97 | 0.554298819             | 0.6079010<br>12 | 0.5071228<br>42 |
|                         | Xenograft     | 0.365774914        | 0.5602133<br>47 | 0.5245965<br>97 | 1               | 0.599758389             | 0.6376763<br>29 | 0.6098458<br>02 |
| Whole genome sequencing | Primary Tumor | 0.498693966        | 0.6395293<br>16 | 0.5542988<br>19 | 0.5997583<br>89 | 1                       | 0.9699160<br>45 | 0.8920434<br>26 |
|                         | Metastasis    | 0.528172936        | 0.7028072<br>81 | 0.6079010<br>12 | 0.6376763<br>29 | 0.969916045             | 1               | 0.9231031<br>36 |
|                         | Xenograft     | 0.580700291        | 0.6447669<br>32 | 0.5071228<br>42 | 0.6098458<br>02 | 0.892043426             | 0.9231031<br>36 | 1               |

**Supplementary Table 12.** Summary of libraries used for structural variation analysis.

| <b>Samples</b>          | <b>Library name</b> | <b>Mean insert size (bp)</b> | <b>SD (bp)</b> | <b>Read length</b> |
|-------------------------|---------------------|------------------------------|----------------|--------------------|
| <b>Brain metastasis</b> | Library 1           | 173.38                       | 28.45          | 64.14              |
| <b>Brain metastasis</b> | Library 2           | 262.4                        | 48.43          | 75.00              |
| <b>Brain metastasis</b> | Library 3           | 176.71                       | 23.82          | 75.00              |
| <b>Brain metastasis</b> | Library 4           | 292.61                       | 49.77          | 75.00              |
| <b>Brain metastasis</b> | Library 5           | 117.03                       | 19.01          | 75.00              |
| <b>Brain metastasis</b> | Library 6           | 335.13                       | 98.97          | 75.00              |
| <b>Peripheral blood</b> | Library 1           | 182.93                       | 27.46          | 79.45              |
| <b>Peripheral blood</b> | Library 2           | 311.74                       | 54.63          | 78.38              |
| <b>Peripheral blood</b> | Library 3           | 197.23                       | 24.56          | 100.00             |
| <b>Peripheral blood</b> | Library 4           | 316.91                       | 45.15          | 100.00             |
| <b>Peripheral blood</b> | Library 5           | 170.28                       | 21.44          | 75.00              |
| <b>Peripheral blood</b> | Library 6           | 170.87                       | 24.27          | 75.00              |
| <b>Peripheral blood</b> | Library 7           | 386.5                        | 65.75          | 75.00              |
| <b>Peripheral blood</b> | Library 8           | 290.77                       | 40.99          | 75.00              |
| <b>Peripheral blood</b> | Library 12          | 120.47                       | 17.17          | 75.00              |
| <b>Peripheral blood</b> | Library 13          | 176.49                       | 60.42          | 39.00              |
| <b>Peripheral blood</b> | Library 14          | 178.36                       | 61.77          | 39.00              |
| <b>Peripheral blood</b> | Library 15          | 177.48                       | 62.99          | 39.00              |
| <b>Peripheral blood</b> | Library 16          | 174.59                       | 61.18          | 39.00              |
| <b>Primary tumor</b>    | Library 1           | 204.05                       | 29.9           | 63.33              |
| <b>Primary tumor</b>    | Library 2           | 200.53                       | 116.05         | 72.57              |
| <b>Primary tumor</b>    | Library 3           | 212.84                       | 29.35          | 62.26              |
| <b>Primary tumor</b>    | Library 4           | 227.34                       | 124.68         | 73.43              |
| <b>Xenograft</b>        | Library 1           | 189.01                       | 26.2           | 71.68              |
| <b>Xenograft</b>        | Library 2           | 141.17                       | 109.78         | 35.78              |
| <b>Xenograft</b>        | Library 3           | 188.59                       | 26.84          | 74.55              |
| <b>Xenograft</b>        | Library 4           | 140.45                       | 104.82         | 36.00              |

**Supplementary Table 13.** Assembled translocations.

| Type          | Tumor source                         | Chromosome A | Breakpoint A | Orientation A | Chromosome B | Breakpoint B | Orientation B | Gene                |
|---------------|--------------------------------------|--------------|--------------|---------------|--------------|--------------|---------------|---------------------|
| Translocation | Primary Tumor, Metastasis, Xenograft | 1            | 245548334    | minus         | 2            | 64855174     | plus          | ZNF496              |
| Translocation | Primary Tumor, Metastasis, Xenograft | 2            | 64855565     | plus          | 6            | 144243118    | minus         | C6orf94             |
| Translocation | Primary Tumor, Metastasis, Xenograft | 4            | 188855443    | plus          | 9            | 139022260    | plus          | ABCA2               |
| Translocation | Primary Tumor, Metastasis, Xenograft | 1            | 204459091    | plus          | 4            | 147603427    | minus         | SLC10A7             |
| Translocation | Primary Tumor, Xenograft             | 1            | 232964339    | plus          | 5            | 142123065    | plus          |                     |
| Translocation | Primary Tumor, Metastasis, Xenograft | 1            | 35723320     | plus          | 19           | 6102013      | minus         | KIAA0319L, ACSBG2   |
| Translocation | Metastasis, Xenograft                | 2            | 65010855     | plus          | 6            | 144244490    | minus         | C6orf94             |
| Translocation | Primary Tumor, Metastasis, Xenograft | 2            | 165126335    | plus          | 16           | 4537865      | plus          | GRB14               |
| Translocation | Primary Tumor, Metastasis, Xenograft | 3            | 188010736    | minus         | 19           | 17188979     | plus          | USE1                |
| Translocation | Primary Tumor, Metastasis, Xenograft | 4            | 89034073     | plus          | 6            | 44329592     | plus          | HSP90AB3P, HSP90AB1 |
| Translocation | Xenograft                            | 4            | 133969991    | minus         | 18           | 9304740      | plus          |                     |
| Translocation | Metastasis, Xenograft                | 6            | 31958079     | plus          | 10           | 42184694     | minus         | EHMT2               |
| Translocation | Primary Tumor, Xenograft             | 7            | 97691541     | minus         | 19           | 16528270     | plus          | TECPRI, SLC35E1     |
| Translocation | Primary Tumor                        | 7            | 107452378    | plus          | 20           | 59581275     | minus         | LAMB4, CDH4         |
| Translocation | Metastasis, Xenograft                | 12           | 10874018     | plus          | 14           | 99382253     | minus         | EML1                |
| Translocation | Primary Tumor, Metastasis, Xenograft | 16           | 362509       | minus         | 17           | 3842170      | minus         | TMEM8A              |
| Translocation | Metastasis, Xenograft                | 16           | 442130       | plus          | 17           | 3720863      | plus          | RAB11FIP3, CAMKK1   |
| Translocation | Primary Tumor, Metastasis, Xenograft | 16           | 69630532     | plus          | 17           | 43100610     | plus          | HYDIN, KPNB1        |
| Translocation | Metastasis                           | 7            | 142047745    | minus         | 9            | 33642293     | minus         | TCRVB               |

**Supplementary Table 14.** GO annotation for genes enriched in metastasis and/or xenograft.

| GO         | Description                          | Genes                                   |
|------------|--------------------------------------|-----------------------------------------|
| GO:0005524 | ATP binding                          | TXNDC6 NRK ADCY3 MAP3K8 TP53<br>DYNC2H1 |
| GO:0008270 | zinc ion binding                     | TADA2A ZNF786 DPEP3 TP53                |
| GO:0005737 | cytoplasm                            | TXNDC6 PID1 DLG5 ADCY3 WWTR1            |
| GO:0006350 | cellular transcription               | FOXI1 ZNF786 MYCBP2 WWTR1               |
| GO:0003700 | transcription factor activity        | FOXI1 TADA2A NRK TP53                   |
| GO:0005634 | nucleus                              | FOXI1 RBM47 PTPRJ ZNF786                |
| GO:0005886 | plasma membrane                      | PAQR7 SLC44A1 DYNC2H1                   |
| GO:0045449 | regulation of cellular transcription | TADA2A NRK                              |
| GO:0005515 | protein binding                      | PTPRJ MAP3K8 DHDDS                      |
| GO:0016021 | integral to membrane                 | PAQR7 SLC44A1 NALCN                     |
| GO:0000287 | magnesium ion binding                | ADCY3 MAP3K8                            |
| GO:0005887 | integral to plasma membrane          | PTPRJ ADCY3                             |
| GO:0006468 | protein amino acid phosphorylation   | NRK MAP3K8                              |
| GO:0004872 | receptor activity                    | PAQR7 CHRNA9                            |
| GO:0005509 | calcium ion binding                  | CHRNA9                                  |
| GO:0005856 | cytoskeleton                         | TXNDC6                                  |
| GO:0030054 | cell junction                        | PTPRJ CHRNA9                            |
| GO:0005829 | cytosol                              | MAP3K8                                  |
| GO:0003723 | RNA binding                          | RBM47 RBMX2                             |
| GO:0007275 | multicellular organismal development | PAQR7 DYNC2H1                           |

**Supplementary Table 15.** 454 read counts for RT-PCR products of 11 mutations in excel spreadsheet.

## E. Supplementary References

### References

1. Mardis, E.R., Ding, L., Dooling, D.J., Larson, D.E., McLellan, M.D., Chen, K., Koboldt, D.C., Fulton, R.S., Delehaunty, K.D., McGrath, S.D., et al. 2009. Recurring mutations found by sequencing an acute myeloid leukemia genome. *N Engl J Med* 361:1058-1066.
2. Li, H., Ruan, J., and Durbin, R. 2008. Mapping short DNA sequencing reads and calling variants using mapping quality scores. *Genome Res* 18:1851-1858.
3. Ng, P.C., and Henikoff, S. 2003. SIFT: Predicting amino acid changes that affect protein function. *Nucleic Acids Res* 31:3812-3814.
4. Ning, Z., Cox, A.J., and Mullikin, J.C. 2001. SSAHA: a fast search method for large DNA databases. *Genome Res* 11:1725-1729.
5. Koboldt, D.C., Chen, K., Wylie, T., Larson, D.E., McLellan, M.D., Mardis, E.R., Weinstock, G.M., Wilson, R.K., and Ding, L. 2009. VarScan: variant detection in massively parallel sequencing of individual and pooled samples. *Bioinformatics* 25:2283-2285.
6. Ding, L., Getz, G., Wheeler, D.A., Mardis, E.R., McLellan, M.D., Cibulskis, K., Sougnez, C., Greulich, H., Muzny, D.M., Morgan, M.B., et al. 2008. Somatic mutations affect key pathways in lung adenocarcinoma. *Nature* 455:1069-1075.
7. Stephens, P., Edkins, S., Davies, H., Greenman, C., Cox, C., Hunter, C., Bignell, G., Teague, J., Smith, R., Stevens, C., et al. 2005. A screen of the complete protein kinase gene family identifies diverse patterns of somatic mutations in human breast cancer. *Nat Genet* 37:590-592.
8. Chen, K., Wallis, J.W., McLellan, M.D., Larson, D.E., Kalicki, J.M., Pohl, C.S., McGrath, S.D., Wendl, M.C., Zhang, Q., Locke, D.P., et al. 2009. BreakDancer: an algorithm for high-resolution mapping of genomic structural variation. *Nat Methods* 6:677-681.
